# Supplementary material
Source: publisher figshare collection journal article supplement (https://sage.figshare.com/ndownloader/files/18531386)
Supplement: Supplementary file 1 [file 18531386]

## Sheet: All records identified
Author	Title	Year of publication	Database
Merenda	The day I took my last dive: a patient's viewpoint after SCI	2001	Pubmed
Kuno	...and after the clinic? Reflections on domestic-familial rehabilitation and management of the spinal cord injured patient	1992	Pubmed
Coe	22 years a tetraplegic	1982	Pubmed
Crevoisier	4/11. The paraplegic patient	2008	Pubmed
Ulin	A biomechanical analysis of methods used for transferring totally dependent patient	1997	Pubmed
Chung	A causal model of rehabilitation resource use for subjects with spinal cord injury in Taiwan	2003	Pubmed
Prentke	A chin switch for control of orthoses	1970	Pubmed
Yim	A comparison of bowel care patterns in patients with spinal cord injury: upper motor neuron bowel vs lower motor neuron bowel	2001	Pubmed
Bonaroti	A comparison of FES with KAFO for providing ambulation and upright mobility in a child with a complete thoracic spinal cord injury	1999	Pubmed
Harker	A comparison of independent living outcomes following traumatic brain injury and spinal cord injury	2002	Pubmed
Hughes	A comparison of spinergy versus standard steel-spoke wheelchair wheels	2005	Pubmed
Rades	A comparison of two different radiation schedules for metastatic spinal cord compression considering a new prognostic factor	2002	Pubmed
Yavuz	A comparison of two functional tests in quadriplegia: the quadriplegia index of function and the functional independence measure	1998	Pubmed
Sgouros	A critical appraisal of pediculated omental graft transposition in progressive spinal cord failure	1996	Pubmed
Perrier	A description and estimate of very low-intensity activity and inactive awake time in community-dwelling adults with chronic spinal cord injury	2016	Pubmed
Hokken	A dynamic pronation orthosis for the C6 tetraplegic arm.	1993	Pubmed
Boswell	A Falls Concern Scale for people with spinal cord injury (SCI-FCS)	2010	Pubmed
Prabhaka	A follow-up program in India for patients with spinal cord injury: paraplegia safari.	2004	Pubmed
Greene	A knee and ankle flexing hybrid orthosis for paraplegic ambulation	2003	Pubmed
Krause	A latent variable structural path model of health behaviors after spinal cord injury.	2009	Pubmed
Krause	A latent variable structural path model of health behaviors after spinal cord injury.	2009	Pubmed
Jones	A level of independence	1988	Pubmed
Saunders	A longitudinal study of depression in survivors of spinal cord injury	2012	Pubmed
Lambert	A lousy, rotten deal	1983	Pubmed
Stauffer	A master-plan for teaching the patient with spinal cord injury	1979	Pubmed
Soopramanien	A medico-social survey of Romanians with spinal cord injury	1995	Pubmed
Meyers	A model of outcomes research: spinal cord injury	2000	Pubmed
Nooijen	A more active lifestyle in persons with a recent spinal cord injury benefits physical fitness and health	2012	Pubmed
Catz	A multicenter international study on the Spinal Cord Independence Measure, version III: Rasch psychometric validation	2007	Pubmed
Cifu	A multicenter investigation of age-related differences in lengths of stay, hospitalization charges, and outcomes for a matched tetraplegia sample	1999	Pubmed
Pagliacci	A multicentre follow-up of clinical aspects of traumatic spinal cord injury.	2007	Pubmed
Kennedy	A multi-centre study of the community needs of people with spinal cord injuries: the first 18 months	2010	Pubmed
Audu	A neuroprosthesis for control of seated balance after spinal cord injury. J Neuroeng Rehabil	2015	Pubmed
Yu	A neuroprosthesis for high tetraplegia	2001	Pubmed
Adler	A new assistive device for intermittent self-catheterization in men with tetraplegia	2003	Pubmed
Lawlor	A new dynamic triceps-driven orthosis (DTDO): achieving elbow flexion in patients with C5 deficits	1998	Pubmed
Bluvshtein	A new grading for easy and concise description of functional status after spinal cord lesions.	2012	Pubmed
Roberts	A new life. Interview by Mary Hampshire.	1998	Pubmed
Kohlmeyer	A new orthosis for central cord syndrome and brachial plexus injuries	1990	Pubmed
Lude	A new, more creative approach is called for	2015	Pubmed
Thorsen	A noninvasive neuroprosthesis augments hand grasp force in individuals with cervical spinal cord injury: the functional and therapeutic effects	2013	Pubmed
Hohl	A novel classification system for traumatic central cord syndrome: the central cord injury scale (CCIS)	2010	Pubmed
Saunders	A novel method for testing learning and preferences in people with minimal motor movement	2005	Pubmed
Engstrand	A nursing challenge: effective patient education	1979	Pubmed
Urbano	A PC-based system for evaluating the efficacy of the NESS Handmaster orthosis	2003	Pubmed
Hogan	A personal view of independent living	1989	Pubmed
Oh	A Phase III Clinical Trial Showing Limited Efficacy of Autologous Mesenchymal Stem Cell Therapy for Spinal Cord Injury	2016	Pubmed
Lou	A pilot study to assess the relationships among coping, self-efficacy and functional improvement in men with paraplegia	1997	Pubmed
Sato	A preliminary study describing body position in daily life in children with severe cerebral palsy using a wearable device	2011	Pubmed
Douglas	A preschool severely disabled boy and his powered wheelchair: a case study	1987	Pubmed
Mulcahey	A prospective evaluation of upper extremity tendon transfers in children with cervical spinal cord injury	1999	Pubmed
van den Berg-Emons	A prospective study on physical activity levels after spinal cord injury during inpatient rehabilitation and the year after discharge	2008	Pubmed
Vilchis-Aranguren	A prospective, longitudinal, descriptive study of the effect of a customized wheelchair cushion on clinical variables, satisfaction, and functionality among patients with spinal cord injury.	2015	Pubmed
Berry	A psychometric analysis of the Needs Assessment Checklist (NAC)	2003	Pubmed
Crawford	A question of attitude	1992	Pubmed
Hsieh	A Rasch analysis of the Frenchay Activities Index in patients with spinal cord injury	2007	Pubmed
Mattson-Prince	A rational approach to long-term care: comparing the independent living model with agency-based care for persons with high spinal cord injuries	1997	Pubmed
Esclarín-De Ruz	A robotic system for gait re-education in patients with an incomplete spinal cord injury	2009	Pubmed
DeSanto-Madeya	A secondary analysis of the meaning of living with spinal cord injury using Roy's adaptation model	2006	Pubmed
Geis	A self care program for quadriplegic patients	1974	Pubmed
Boss	A self-care assessment tool (SCAT) for persons with a spinal cord injury: an expanded abstract	1996	Pubmed
Fridén	A single-stage operation for reconstruction of hand flexion, extension, and intrinsic function in tetraplegia: the alphabet procedure	2011	Pubmed
Symington	A study of functional independence in the quadriplegic patient	1966	Pubmed
Choi	A study of home care needs of patients at discharge and effects of home care--centered on patients discharged from a rural general hospital	1992	Pubmed
Jan	A survey of chronic pain in the pediatric spinal cord injury population	2004	Pubmed
Gay	A survey of problems of independence in paraplegics	1975	Pubmed
Velstra	A systematic literature review of outcome measures for upper extremity function using the international classification of functioning, disability, and health as reference	2011	Pubmed
Tsang	A systematic review and comparison of questionnaires in the management of spinal cord injury, multiple sclerosis and the neurogenic bladder.	2016	Pubmed
Fliess-Douer	A systematic review of wheelchair skills tests for manual wheelchair users with a spinal cord injury: towards a standardized outcome measure	2010	Pubmed
Dijkers	A tale of two countries: environmental impacts on social participation after spinal cord injury	2002	Pubmed
Bendixen	A telerehabilitation model for victims of polytrauma.	2008	Pubmed
Solyom	A treatment program for functional paraplegia/Munchausen syndrome	1990	Pubmed
Jang	A validity study of the WHOQOL-BREF assessment in persons with traumatic spinal cord injury	2004	Pubmed
Henshaw	ABC of spinal cord injury. Occupational therapy	1986	Pubmed
Kinnersly	ABC of spinal cord injury. Transfer of care from hospital to community	1986	Pubmed
van den Berg-Emons	Accelerometry-based activity spectrum in persons with chronic physical conditions	2010	Pubmed
Anderson	Acceptable benefits and risks associated with surgically improving arm function in individuals living with cervical spinal cord injury	2009	Pubmed
Kratz	Acceptance of pain in neurological disorders: associations with functioning and psychosocial well-being	2013	Pubmed
Richards	Access to the environment and life satisfaction after spinal cord injury	1999	Pubmed
Inokuchi	Accidental falls	2013	Pubmed
Lim	Accommodating Autistics and Treating Autism: Can We Have Both? Bioethics.	2015	Pubmed
Boothe	Achieving normalcy following spinal cord injury	1999	Pubmed
Braun	Activation of paraplegic patients by functional electrical stimulation: training and biomechanical evaluation	1985	Pubmed
Garshick	Active Lifestyle Is Associated With Reduced Dyspnea and Greater Life Satisfaction in Spinal Cord Injury	2016	Pubmed
van der Woude	Active LifestyLe Rehabilitation interventions in aging spinal cord injury (ALLRISC): a multicentre research program.	2013	Pubmed
Hetz	Activities of daily living performed by individuals with SCI: relationships with physical fitness and leisure time physical activity	2009	Pubmed
Henriksen	Activities of daily living. Specialized care of the spinal cord injured patient	1976	Pubmed
Ullrich	Activity and participation after spinal cord injury: state-of-the-art report	2012	Pubmed
Wangdell	Activity gains after reconstructions of elbow extension in patients with tetraplegia.	2012	Pubmed
Stineman	Activity Limitation Stages empirically derived for Activities of Daily Living (ADL) and Instrumental ADL in the U.S. Adult community-dwelling Medicare population	2014	Pubmed
Halstead	Activity monitoring in chronic illness: time out of bed for tetraplegics during comprehensive rehabilitation	1978	Pubmed
Dahlgren	Activity performance and upper extremity function in cervical spinal cord injury patients according to the Klein-Bell ADL Scale	2007	Pubmed
Jones	Activity-based therapy for recovery of walking in individuals with chronic spinal cord injury: results from a randomized clinical trial	2014	Pubmed
Mitcho	Acute care management of spinal cord injuries	1999	Pubmed
Kalita	Acute pure motor quadriplegia: is it dengue myositis?	2005	Pubmed
Aguilar	Adaptation and validation of the Spanish self-report version of the Spinal Cord Independence Measure (SCIM III).	2015	Pubmed
Harel	Adaptation of computerized posturography to assess seated balance in persons with spinal cord injury	2013	Pubmed
Küçükdeveci	Adaptation of the modified Barthel Index for use in physical medicine and rehabilitation in Turkey	2000	Pubmed
Smith	Adapted bed controls and the quadriplegic patient	1978	Pubmed
Collins	Adapted plate for use in a microwave oven	1978	Pubmed
Wilson	Adapting "Portage" for neurological patients	1985	Pubmed
LoPresti	Adaptive software for head-operated computer controls	2004	Pubmed
Rodakowski	Additive effect of age on disability for individuals with spinal cord injuries.	2014	Pubmed
Webster	Addressing children's needs and evaluating rehabilitation outcome after spinal cord injury: the child needs assessment checklist and goal-planning program	2007	Pubmed
Qureshi	Adductor tenotomy and selective obturator neurectomy for the treatment of spasticity in a man with paraplegia	2013	Pubmed
Craig	Adjustment following chronic spinal cord injury: Determining factors that contribute to social participation	2015	Pubmed
Vogel	Adults with pediatric-onset spinal cord injuries: part 3: impact of medical complications.	2002	Pubmed
Jones	After Oswestry--what next?	1979	Pubmed
Putzke	Age and spinal cord injury: an emphasis on outcomes among the elderly.	2003	Pubmed
Molton	Age and the role of restricted activities in adjustment to disability-related pain.	2014	Pubmed
Penrod	Age effect on prognosis for functional recovery in acute, traumatic central cord syndrome	1990	Pubmed
Crewe	Ageing and severe physical disability: patterns of change and implications for services	1991	Pubmed
Weitzenkamp	Ageing with spinal cord injury: cross-sectional and longitudinal effects	2001	Pubmed
Seel	Age-related differences in length of stays, hospitalization costs, and outcomes for an injury-matched sample of adults with paraplegia	2001	Pubmed
Seel	Age-related differences in length of stays, hospitalization costs, and outcomes for an injury-matched sample of adults with paraplegia.	2001	Pubmed
Hinrichs	Age-related variation in mobility independence among wheelchair users with spinal cord injury: A cross-sectional study	2016	Pubmed
Kemp	Aging and spinal cord injury: medical, functional, and psychosocial changes	2002	Pubmed
Liem	Aging with a spinal cord injury: factors associated with the need for more help with activities of daily living	2004	Pubmed
Charlifue	Aging with spinal cord injury: changes in selected health indices and life satisfaction	2004	Pubmed
Lüthi	Aging with vitality	2015	Pubmed
McColl	Aging, spinal cord injury, and quality of life: structural relationships	2003	Pubmed
Barlow	Aids for the disabled: a measure of independence	1974	Pubmed
Sasaki	Allodynia corresponding to the levels of cervical cord injury treated by surgical decompression: a report of 3 cases	2009	Pubmed
Hardin	Ambulation and spinal cord injury	2013	Pubmed
Díaz	Ambulation in patients with myelomeningocele: a study of 1500 patients	1993	Pubmed
Stauffer	Ambulation in thoracic paraplegia	1978	Pubmed
Hamon-Mekki	An "expanded" nurse-patient relationship guaranteed by experience and professionalism	2003	Pubmed
Shaddinger	An acute spinal cord injury: my family's story	1995	Pubmed
Bryden	An ADL measure for spinal cord injury	2011	Pubmed
Peckham	An advanced neuroprosthesis for restoration of hand and upper arm control using an implantable controller	2002	Pubmed
Matsumura	An approach in assisting a patient's recovery of independent actions. A lesson in interactions with a patient with a cervical spinal cord injury who was unwilling to accept rehabilitation therapy	1985	Pubmed
Kennedy	An audit of demographics and rehabilitation outcomes in non-traumatic spinal cord injury	2016	Pubmed
Prior	An electric wheelchair mounted robotic arm--a survey of potential users	1990	Pubmed
Saxena	An EMG-controlled grasping system for tetraplegics	1995	Pubmed
Smith	An enquiry into the use of financial compensation for severe injury	1990	Pubmed
The Rehabilitation R&D Evaluation Unit	An evaluation of capuchin monkeys trained to help severely disabled individuals	1991	Pubmed
McCormack	An exercise protocol for SCI	1977	Pubmed
Rottkamp	An experimental nursing study: a behavior modification approach to nursing therapeutics in body positioning of spinal cord-injured patients	1976	Pubmed
Andrade	An ICF-based approach for cerebral palsy from a biopsychosocial perspective	2012	Pubmed
Kilgore	An implanted myoelectrically-controlled neuroprosthesis for upper extremity function in spinal cord injury.	2006	Pubmed
Kilgore	An implanted upper-extremity neuroprosthesis using myoelectric control.	2008	Pubmed
Kilgore	An implanted upper-extremity neuroprosthesis. Follow-up of five patients.	1997	Pubmed
Perrier	An investigation of seasonal variation in leisure-time physical activity in persons with spinal cord injury	2012	Pubmed
Magora	An investigation of the problem of sick-leave in the patient suffering from low back pain	1969	Pubmed
Magora	An investigation of the problem of sick-leave in the patient suffering from low back pain.	1969	Pubmed
Lai	An Item Bank to Measure Systems, Services, and Policies: Environmental Factors Affecting People With Disabilities	2016	Pubmed
Kaji	Analysis and control of factors responsible for preventing social rehabilitation of patients with cervical cord injuries	1983	Pubmed
Meiners	Analysis of FIM-values during the hospital treatment of patients with acute spinal cord injury	2004	Pubmed
Hu	Analysis of functional status, quality of life and community integration in earthquake survivors with spinal cord injury at hospital discharge and one-year follow-up in the community	2012	Pubmed
Gagnon	Analysis of quality of life in patients with spinal cord injury: environmental and self esteem variables	1996	Pubmed
Theilig	András Petö conductive promotion	2004	Pubmed
Desachy	Animal therapy: current status and future	1996	Pubmed
Coignard	ANSO study: evaluation in an indoor environment of a mobile assistance robotic grasping arm.	2013	Pubmed
Ferch	Anterior correction of cervical kyphotic deformity: effects on myelopathy, neck pain, and sagittal alignment	2004	Pubmed
Anderson	Anterior decompression and arthrodesis of the cervical spine: long-term motor improvement. Part II--Improvement in complete traumatic quadriplegia	1992	Pubmed
Baba	Anterior decompressive surgery for cervical ossified posterior longitudinal ligament causing myeloradiculopathy	1995	Pubmed
Sakai	Anterior transvertebral herniotomy for cervical disc herniation: a long-term follow-up study	2009	Pubmed
Vall	Application of International Classification of Functioning, Disability and Health (ICF) in individuals with spinal cord injury	2011	Pubmed
Vall	Application of International Classification of Functioning, Disability and Health (ICF) in individuals with spinal cord injury.	2011	Pubmed
Hakenberg	Application of the Mitrofanoff principle for intermittent self-catheterization in quadriplegic patients	2001	Pubmed
Henderson	Application of ventilatory strategies to enhance functional activities for an individual with spinal cord injury	2005	Pubmed
Kadanka	Approaches to spondylotic cervical myelopathy: conservative versus surgical results in a 3-year follow-up study	2002	Pubmed
Ferrari	Artificial grasping system for the paralyzed hand	2000	Pubmed
Lalumiere	Ascending curbs of progressively higher height increases forward trunk flexion along with upper extremity mechanical and muscular demands in manual wheelchair users with a spinal cord injury	2013	Pubmed
Kozin	Ashworth S, Mulcahey MJ. Biceps-to-triceps transfer for elbow extension in persons with tetraplegia.	2010	Pubmed
Gärtner	Aspects of rehabilitation after early stabilization of complex injury of the cervical spine	1991	Pubmed
Nicklas	Aspects of the life situation of spinal cord injured persons – a socio-medical study of 246 persons with spinal cord injuries (author's transl)	1980	Pubmed
Tolerico	Assessing mobility characteristics and activity levels of manual wheelchair users	2007	Pubmed
Klaas	Assessing patterns of participation and enjoyment in children with spinal cord injury.	2010	Pubmed
Ravenek	Assessing quality of life in relation to physical activity participation in persons with spinal cord injury: a systematic review	2012	Pubmed
Chaves	Assessing the influence of wheelchair technology on perception of participation in spinal cord injury	2004	Pubmed
Begue-Simon	Assessment instruments used in rehabilitation	1989	Pubmed
Khenioui	Assessment of chronic pain as a disability in patients with spinal cord injuries	2006	Pubmed
Dearwater	Assessment of physical activity in inactive populations	1985	Pubmed
Bourke-Taylor	Assessment of Unilateral Upper Limb Function: construct validity and correlation with the Pediatric Evaluation of Disability Inventory	2003	Pubmed
Shoji	Assistance for young paraplegic patients and the nursing personnel--with special reference to the psychological approach	1981	Pubmed
Shimoyama	Assistance of a patient with a cervical cord injury resisting the ADL training	1980	Pubmed
Allison	Assisted reach and transfers in individuals with tetraplegia: towards a solution.	1997	Pubmed
Linskell	Assisted-living spaces for end-users with complex needs: a proposed implementation and delivery model	2012	Pubmed
Bates	Assistive technology and the newly disabled adult: adaptation to wheelchair use.	1993	Pubmed
Friesen	Assistive technology devices for toileting and showering used in spinal cord injury rehabilitation - a comment on terminology	2016	Pubmed
Platts	Assistive technology in the rehabilitation of patients with high spinal cord lesions.	1993	Pubmed
Blair	Assistive technology: what and how for persons with spinal cord injury	2000	Pubmed
Morse	Association between mobility mode and C-reactive protein levels in men with chronic spinal cord injury	2008	Pubmed
Brotherton	Association between reliance on devices and people for walking and ability to walk community distances among persons with spinal cord injury.	2012	Pubmed
Cohen	Association between the functional independence measure following spinal cord injury and long-term outcomes	2012	Pubmed
Kalpakjian	Association of daily stressors and salivary cortisol in spinal cord injury.	2009	Pubmed
Krause	Association of mode of locomotion and independence in locomotion with long-term outcomes after spinal cord injury	2009	Pubmed
Eriks-Hoogland	Association of Shoulder Problems in Persons With Spinal Cord Injury at Discharge From Inpatient Rehabilitation With Activities and Participation 5 Years Later	2016	Pubmed
Bourke	Attending to biographical disruption: the experience of rehabilitation following tetraplegia due to spinal cord injury	2015	Pubmed
Gannon	Attitudes toward disability and beliefs regarding support for a university student with quadriplegia	1996	Pubmed
Brown	Attribution of responsibility for injury and long-term outcome of patients with paralytic spinal cord trauma	1999	Pubmed
Gruskin	Auditory feedback device in a patient with left-sided neglect	1983	Pubmed
Carroll	Australian experience with the Freehand System for restoring grasp in quadriplegia	2000	Pubmed
Mackay-Sim	Autologous olfactory ensheathing cell transplantation in human paraplegia: a 3-year clinical trial	2008	Pubmed
Hou	Autonomic consequences of spinal cord injury	2014	Pubmed
Shepherd	Back to basics	1999	Pubmed
Lohne	Back to life again--patients' experiences of hope three to four years after a spinal cord injury--a longitudinal study	2009	Pubmed
Silver	Barriers for individuals with spinal cord injury returning to the community: a preliminary classification	2012	Pubmed
Vissers	Barriers to and facilitators of everyday physical activity in persons with a spinal cord injury after discharge from the rehabilitation centre	2008	Pubmed
Jaarsma	Barriers to and facilitators of sports participation for people with physical disabilities: a systematic review	2014	Pubmed
Tsai	Basic psychometric properties of the transfer assessment instrument (version 3.0)	2013	Pubmed
Höök	Bed hoist for tetraplegic patients	1970	Pubmed
Suzuki	Bedside nursing. Assistance for a patient with a spinal cord injury who has lost desire for social rehabilitation	1979	Pubmed
Rintala	Behavioral and demographic predictors of postdischarge outcomes in spinal cord injury	1987	Pubmed
Duman	Behcet's disease presenting with sudden-onset paraplegia due to anterior spinal artery involvement: 1-year follow-up of rehabilitation in conjunction with medication	2013	Pubmed
Steeves	Bench to bedside: challenges of clinical translation	2015	Pubmed
Li	Beneficial effects of the herbal medicine Di Huang Yin Zi in patients with spinal cord injury: a randomized, placebo-controlled clinical study	2012	Pubmed
Lu	Benefits of rehabilitation for traumatic spinal cord injury: a case report	1996	Pubmed
Stuifbergen	Benefits of wellness interventions for persons with chronic and disabling conditions: a review of the evidence	2010	Pubmed
Kuz	Biceps-to-triceps transfer in tetraplegic patients: report of the medial routing technique and follow-up of three cases	1999	Pubmed
Kozin	Bilateral biceps-to-triceps transfer to salvage failed bilateral deltoid-to-triceps transfer: a case report	2002	Pubmed
Dickson	Biographical disruption and the experience of loss following a spinal cord injury: an interpretative phenomenological analysis	2008	Pubmed
Ville	Biographical work and returning to employment following a spinal cord injury	2005	Pubmed
Granger	Biologic patterns of disability	2000	Pubmed
Hashizume	Biomechanics and Physiology for Propelling Wheelchair Uphill Slope	2015	Pubmed
Bauman	Blunted growth hormone response to intravenous arginine in subjects with a spinal cord injury	1994	Pubmed
Hatchett	Body mass index changes over 3 years and effect of obesity on community mobility for persons with chronic spinal cord injury. J Spinal Cord Med.	2016	Pubmed
Effing	Body weight-supported treadmill training in chronic incomplete spinal cord injury: a pilot study evaluating functional health status and quality of life	2006	Pubmed
Wessels	Body weight-supported gait training for restoration of walking in people with an incomplete spinal cord injury: a systematic review	2010	Pubmed
Geva-Dayan	Botulinum toxin injections for pediatric patients with hereditary spastic paraparesis	2010	Pubmed
Naicker	Botulinum toxin type A for rehabilitation after a spinal cord injury: a case report.	2009	Pubmed
Kirshblum	Bowel care practices in chronic spinal cord injury patients	1998	Pubmed
Lynch	Bowel dysfunction following spinal cord injury: a description of bowel function in a spinal cord-injured population and comparison with age and gender matched controls	2000	Pubmed
Waters	Brachioradialis to flexor pollicis longus tendon transfer for active lateral pinch in the tetraplegic	1985	Pubmed
Failla	Brachioradialis transfer for digital palsy	1990	Pubmed
Johnson	Brachioradialis transfer for wrist extension in tetraplegic patients who have fifth-cervical-level neurological function	1996	Pubmed
Chafetz	Bracing for success	2002	Pubmed
Wien	Breathlessness and exercise in spinal cord injury	1999	Pubmed
Wu	Brown-Sèquard syndrome caused by type III odontoid fracture: a case report and review of the literature	2010	Pubmed
Post	Burden of support for partners of persons with spinal cord injuries	2005	Pubmed
Clarke	Caloric costs of activity in paraplegic persons	1966	Pubmed
Halliday	Can functional electric stimulation-assisted rowing reproduce a race-winning rowing stroke?	2004	Pubmed
Whiting	Cannabinoids for Medical Use: A Systematic Review and Meta-analysis	2015	Pubmed
Hjeltnes	Capacity for physical work and training after spinal injuries and strokes	1982	Pubmed
Vavra-Hadziahmetović	Capacity of paraplegic individuals for activities of daily living	2002	Pubmed
Davis	Cardiorespiratory fitness and muscular strength of wheelchair users	1981	Pubmed
Kiyono	Car-driving abilities of people with tetraplegia.	2001	Pubmed
Kemp	Care and services for spinal injured people with, and without, neurological deficit	2002	Pubmed
Jensen	Care and teaching of a patient with cervical neck fracture. Teaching for increased abilities in self help	1981	Pubmed
Walther	Care for single paraplegics by conscentious objectors (author's transl)	1977	Pubmed
Kristel	Care of paraplegics. 3. Independence strengthens self reliance and self esteem	1998	Pubmed
Smith	Caregiving services in spinal cord injury: a systematic review of the literature	2016	Pubmed
Barabas	Care-load for children and young adults with severe cerebral palsy	1992	Pubmed
Gibson	Caring for a patient who lives with a spinal cord injury.	2003	Pubmed
Aljure	Carpal tunnel syndrome in paraplegic patients	1985	Pubmed
Gellman	Carpal tunnel syndrome in paraplegic patients	1988	Pubmed
Oesterling	Carpal tunnel syndrome: an occupational hazard for persons with paraplegia	1995	Pubmed
Winter	Case report: 122° kyphosis secondary to C5-L3 laminectomy and quadriplegia, surgical correction and 30-year follow-up	2011	Pubmed
Kurtz	Case study of an adolescent spinal cord injured patient	1993	Pubmed
Harr	Case study on effect of household task participation on home, community, and work opportunities for a youth with multiple disabilities	2011	Pubmed
Nataraj	Center of mass acceleration feedback control of standing balance by functional neuromuscular stimulation against external postural perturbations	2013	Pubmed
Gillette	Center of pressure measures to assess standing performance	2002	Pubmed
Ina	Central cervical cord syndrome: a case report on rehabilitation, with special references to accidental falls in the elderly	1995	Pubmed
Dudas	Central cord injury: implications for nursing	1984	Pubmed
Wyndaele	Central nervous system tuberculosis reviewed	2015	Pubmed
Vall	Central neuropathic pain and its relation to the quality of life of a person with a traumatic spinal cord injury	2006	Pubmed
Ross	Cervical cord compressive myelopathy in a man with a primary complaint of knee pain	2010	Pubmed
Murphy	Cervical fractures and spinal cord injury: outcome of surgical and nonsurgical management	1990	Pubmed
Marr	Cervical orthoses: the issue of patient compliance	1990	Pubmed
Roche	Cervical spinal cord trauma. Case reports	1975	Pubmed
Fielingsdorf	Cervical spine injury outcome--a review of 101 cases treated in a tertiary referral unit.	2007	Pubmed
Kadaňka	Cervical spondylotic myelopathy: conservative versus surgical treatment after 10 years	2011	Pubmed
Yamazaki	Cervical spondylotic myelopathy: surgical results and factors affecting outcome with special reference to age differences	2003	Pubmed
Sorsdahl	Change in basic motor abilities, quality of movement and everyday activities following intensive, goal-directed, activity-focused physiotherapy in a group setting for children with cerebral palsy	2010	Pubmed
Chen	Change in life satisfaction of adults with pediatric-onset spinal cord injury	2008	Pubmed
van Koppenhagen	Changes and determinants of life satisfaction after spinal cord injury: a cohort study in the Netherlands	2008	Pubmed
Wirth	Changes in activity after a complete spinal cord injury as measured by the Spinal Cord Independence Measure II (SCIM II).	2008	Pubmed
Zariffa	Changes in hand muscle synergies in subjects with spinal cord injury: characterization and functional implications	2012	Pubmed
Richardson	Changes in pain and quality of life in depressed individuals with spinal cord injury: does type of pain matter?	2016	Pubmed
Janssen	Changes in physical strain and physical capacity in men with spinal cord injuries	1996	Pubmed
Velstra	Changes in Strength, Sensation, and Prehension in Acute Cervical Spinal Cord Injury: European Multicenter Responsiveness Study of the GRASSP.	2015	Pubmed
van Boxel	Characteristics of patients from hospital-based in-patient rehabilitation in The Netherlands	1995	Pubmed
Hall	Characteristics of the Functional Independence Measure in traumatic spinal cord injury	1999	Pubmed
Mulcahey	Children's and parents' perspectives about activity performance and participation after spinal cord injury: initial development of a patient-reported outcome measure	2010	Pubmed
Mulcahey	Children's reports of activity and participation after sustaining a spinal cord injury: a cognitive interviewing study	2009	Pubmed
Han	Chronic gastrointestinal problems and bowel dysfunction in patients with spinal cord injury	1998	Pubmed
Ordia	Chronic intrathecal delivery of baclofen by a programmable pump for the treatment of severe spasticity	1996	Pubmed
Goossens	Chronic neuropathic pain in spinal cord injury patients: what is the impact of social and environmental factors on care management?	2009	Pubmed
Modirian	Chronic pain after spinal cord injury: results of a long-term study	2010	Pubmed
Widerström-Noga	Chronic pain after spinal injury: interference with sleep and daily activities	2001	Pubmed
Widerström-Noga	Chronic pain and nonpainful sensations after spinal cord injury: is there a relation?	2003	Pubmed
Turner	Chronic pain associated with spinal cord injuries: a community survey	2001	Pubmed
Rintala	Chronic pain in a community-based sample of men with spinal cord injury: prevalence, severity, and relationship with impairment, disability, handicap, and subjective well-being	1998	Pubmed
Jensen	Chronic pain in individuals with spinal cord injury: a survey and longitudinal study	2005	Pubmed
Hjeltnes	Circulatory strain in everyday life of paraplegics	1979	Pubmed
Sutton	Clean intermittent self-catheterisation for quadriplegic patients--a five year follow-up.	1991	Pubmed
Joseph	Client Perspectives on Reclaiming Participation After a Traumatic Spinal Cord Injury in South Africa	2016	Pubmed
Donnelly	Client-centred assessment and the identification of meaningful treatment goals for individuals with a spinal cord injury	2004	Pubmed
Zörner	Clinical algorithm for improved prediction of ambulation and patient stratification after incomplete spinal cord injury	2010	Pubmed
Liu	Clinical analysis of the treatment of spinal cord injury with umbilical cord mesenchymal stem cells	2013	Pubmed
Thoumie	Clinical and functional evaluation of a gaze controlled system for the severely handicapped	1998	Pubmed
Rintala	Clinical application of longitudinal functional assessment	1980	Pubmed
Goad	Clinical application of the motor impairment concept	1983	Pubmed
Priebe	Clinical assessment of spasticity in spinal cord injury: a multidimensional problem	1996	Pubmed
Zeng	Clinical effect of methylprednisolone sodium succinate and mouse nerve growth factor for injection in treating acute spinal cord injury and cauda equina injury	2010	Pubmed
Hammel	Clinical evaluation of a desktop robotic assistant.	1989	Pubmed
Kato	Clinical evaluation of Luque's segmental spinal instrumentation for upper cervical metastases	2003	Pubmed
Popović	Clinical evaluation of the bionic glove	1999	Pubmed
Campos	Clinical evaluation of the effect of spinal cord stimulation on motor performance in patients with upper motor neuron lesions	1981	Pubmed
Liang	Clinical experience in rehabilitation of spinal cord injury associated with schizophrenia	1996	Pubmed
Shimada	Clinical experience of functional electrical stimulation in complete paraplegia	1996	Pubmed
Fyffe	Clinical interpretation of the Spinal Cord Injury Functional Index (SCI-FI)	2016	Pubmed
Al-Habib	Clinical predictors of recovery after blunt spinal cord trauma: systematic review	2011	Pubmed
McKinley	Clinical presentations, medical complications, and functional outcomes of individuals with gunshot wound-induced spinal cord injury	1999	Pubmed
Gerner	Clinical rehabilitation of the spinal cord injury patient—is the Guttmann concept still valid?	1992	Pubmed
Yoshino	Clinical studies and postoperative results of 51 nonambulatory rheumatoid patients with total joint replacements	1985	Pubmed
Wong	Clinical trial of acupuncture for patients with spinal cord injuries	2003	Pubmed
Józefowski	Clinimetrical scales in spinal cord lesion	2013	Pubmed
Jegede	Cognitive performance in hypotensive persons with spinal cord injury	2010	Pubmed
Fowler	Collaborative efforts in achieving patient outcomes in central cord injury syndrome in the acute care setting	1995	Pubmed
Lynch	Colorectal motility and defecation after spinal cord injury in humans	2006	Pubmed
Boldt	Combined application of the International Classification of Functioning, Disability and Health and the NANDA-International Taxonomy II	2010	Pubmed
Nakashima	Combined posteroanterior surgery for osteoporotic delayed vertebral fracture and neural deficit in patients with Parkinson's disease	2009	Pubmed
Gallagher	Combining Adult Learning Theory with Occupational Therapy Intervention for Bladder and Bowel Management after Spinal Cord Injury: A Case Report	2016	Pubmed
Goodman	Combining traditional physical therapy and karate in the treatment of a patient with quadriplegia	1980	Pubmed
Dinsdale	Community based monitoring for spinal man	1981	Pubmed
Anderson	Community integration among adults with spinal cord injuries sustained as children or adolescents	2003	Pubmed
Samuelkamaleshkumar	Community reintegration in rehabilitated South Indian persons with spinal cord injury	2010	Pubmed
Samuelkamaleshkumar	Community reintegration in rehabilitated South Indian persons with spinal cord injury.	2010	Pubmed
Harrison	Community reintegration of SCI persons: problems and perceptions	1989	Pubmed
Sekaran	Community reintegration of spinal cord-injured patients in rural south India.	2010	Pubmed
Jovanović	Community-based study of health-related quality of life in spinal cord injury, muscular dystrophy, multiple sclerosis, and cerebral palsy	2012	Pubmed
Zhang	Comorbidity and the concentration of healthcare expenditures in older patients with heart failure	2003	Pubmed
Wimmer	Comparative evaluation of luque and isola instrumentation for treatment of neuromuscular scoliosis	2005	Pubmed
Singer	Comparative mortality in cerebral palsy patients in California, 1980-1996	1998	Pubmed
Riek	Comparative shoulder kinematics during free standing, standing depression lifts and daily functional activities in persons with paraplegia: considerations for shoulder health	2008	Pubmed
Agarwal	Comparative study of therapeutic response to baclofen vs tolperisone in spasticity	2017	Pubmed
van Langeveld	Comparing content of therapy for people with a spinal cord injury in postacute inpatient rehabilitation in Australia, Norway, and The Netherlands	2011	Pubmed
McCarthy	Comparing reliability and validity of pediatric instruments for measuring health and well-being of children with spastic cerebral palsy	2002	Pubmed
Noonan	Comparing the reliability of five participation instruments in persons with spinal conditions	2010	Pubmed
Noonan	Comparing the validity of five participation instruments in persons with spinal conditions	2010	Pubmed
Krause	Comparison of the Patient Health Questionnaire and the Older Adult Health and Mood Questionnaire for self-reported depressive symptoms after spinal cord injury	2009	Pubmed
Bednarczyk	Comparison of functional and medical assessment in the classification of persons with spinal cord injury	1993	Pubmed
Bonaroti	Comparison of functional electrical stimulation to long leg braces for upright mobility for children with complete thoracic level spinal injuries.	1999	Pubmed
Gagnon	Comparison of peak shoulder and elbow mechanical loads during weight-relief lifts and sitting pivot transfers among manual wheelchair users with spinal cord injury	2008	Pubmed
McKinley	Comparison of rehabilitation outcomes following vascular-related and traumatic spinal cord injury	2011	Pubmed
Turner-Stokes	Comparison of Rehabilitation Outcomes for Long Term Neurological Conditions: A Cohort Analysis of the Australian Rehabilitation Outcomes Centre Dataset for Adults of Working Age	2015	Pubmed
Bogner	Comparison of scoring methods for the participation assessment with recombined tools-objective	2011	Pubmed
Anderson	Comparison of short-term SF-36 results between total joint arthroplasty and cervical spine decompression and fusion or arthroplasty	2009	Pubmed
van der Zee	Comparison of the Utrecht Scale for Evaluation of Rehabilitation-Participation with the ICF Measure of Participation and Activities Screener and the WHO Disability Assessment Schedule II in persons with spinal cord injury	2014	Pubmed
Aprile	Complex regional pain syndrome	1997	Pubmed
Yavuzer	Compliance with bladder management in spinal cord injury patients	2000	Pubmed
Manns	Components of quality of life for persons with a quadriplegic and paraplegic spinal cord injury.	2001	Pubmed
Wirz	Concepts of aging with paralysis: implications for recovery and treatment	2012	Pubmed
Su	Concomitance of cervical intramedullary traumatic neuroma and cervical cord herniation in a tetraplegic woman	2013	Pubmed
Behari	Congenital reducible atlantoaxial dislocation: classification and surgical considerations	2002	Pubmed
Gilinsky	Considering power	2008	Pubmed
Brady	Constraint-induced movement therapy (CIMT): pediatric applications	2009	Pubmed
Taub	Constraint-Induced Movement Therapy: a new family of techniques with broad application to physical rehabilitation—a clinical review	1999	Pubmed
van Langeveld	Contents of physical therapy, occupational therapy, and sports therapy sessions for patients with a spinal cord injury in three Dutch rehabilitation centres	2011	Pubmed
Pazooki	Continent cutaneous urinary diversion in patients with spinal cord injury	2006	Pubmed
Albright	Continuous intrathecal baclofen infusion for spasticity of cerebral origin	1993	Pubmed
Moore	Coping and emotional attributions following spinal cord injury.	1994	Pubmed
Song	Coping strategies, physical function, and social adjustment in people with spinal cord injury.	2010	Pubmed
van Lankveld	Coping with spinal cord injury: tenacious goal pursuit and flexible goal adjustment.	2011	Pubmed
Fekete	Correlates and determinants of physical activity in persons with spinal cord injury: A review using the International Classification of Functioning, Disability and Health as reference framework	2012	Pubmed
Eriks-Hoogland	Correlation of shoulder range of motion limitations at discharge with limitations in activities and participation one year later in persons with spinal cord injury.	2011	Pubmed
Masala	Cost-effectiveness of percutaneous vertebroplasty in osteoporotic vertebral fractures	2008	Pubmed
Turner-Stokes	Cost-efficiency of specialist hyperacute in-patient rehabilitation services for medically unstable patients with complex rehabilitation needs: a prospective cohort analysis	2016	Pubmed
Turner-Stokes	Cost-efficiency of specialist inpatient rehabilitation for working-aged adults with complex neurological disabilities: a multicentre cohort analysis of a national clinical data set	2016	Pubmed
Gunther	Countertransference issues in staff caregivers who work to rehabilitate catastrophic-injury survivors	1994	Pubmed
Becker-Casademont	Course and prognosis of the rehabilitation of patients following acute polyneuritis	1986	Pubmed
Behari	Craniocervical tuberculosis: protocol of surgical management	2003	Pubmed
Gibson	C-Reactive protein in adults with chronic spinal cord injury: increased chronic inflammation in tetraplegia vs paraplegia	2008	Pubmed
Fries	Critical rehabilitation of the patient with spinal cord injury	2005	Pubmed
Fattal	Critical review of the evaluation of the results of upper limb functional surgery in tetraplegia since 50 years	2004	Pubmed
McLaughlin	Critique of "Health Program Maintenance by Males with Spinal Cord Injury".	1976	Pubmed
Lawton	Cross-cultural validity of FIM in spinal cord injury	2006	Pubmed
Lundgren-Nilsson	Cross-diagnostic validity in a generic instrument: an example from the Functional Independence Measure in Scandinavia.	2006	Pubmed
Forchheimer	Cut point determination in the measurement of pain and its relationship to psychosocial and functional measures after traumatic spinal cord injury: a retrospective model spinal cord injury system analysis	2011	Pubmed
Yamasaki	Daily energy expenditure in active and inactive persons with spinal cord injury.	1992	Pubmed
Burke	Data on spinal injuries--Part II. Outcome of the treatment of 352 consecutive admissions	1985	Pubmed
Clark	Data-based models of how pressure ulcers develop in daily-living contexts of adults with spinal cord injury	2006	Pubmed
Dunn	Decision-Making About Upper Limb Tendon Transfer Surgery by People With Tetraplegia for More Than 10 Years	2016	Pubmed
Dunkerley	Deltoid triceps transfer and functional independence of people with tetraplegia	2000	Pubmed
Hunt	Demographic and socioeconomic factors associated with disparity in wheelchair customizability among people with traumatic spinal cord injury	2004	Pubmed
Martinsen	Dependence on care experienced by people living with Duchenne muscular dystrophy and spinal cord injury	2012	Pubmed
MacDonald	Depression and activity patterns of spinal cord injured persons living in the community	1987	Pubmed
Tate	Depression and pain among inpatients with spinal cord injury and spinal cord disease: differences in symptoms and neurological function.	2013	Pubmed
Clair-Auger	Depression and recovery of reflex amplitude during electrical stimulation after spinal cord injury	2013	Pubmed
Clair-Auger	Depression and recovery of reflex amplitude during electrical stimulation afterspinal cord injury	2013	Pubmed
Fedoroff	Depression in patients with acute traumatic brain injury	1992	Pubmed
Geyh	Describing functioning and health after spinal cord injury in the light of psychological-personal factors	2016	Pubmed
Zanca	Describing what we do: a qualitative study of clinicians' perspectives on classifying rehabilitation interventions	2014	Pubmed
Kuipers	Descriptions of community by people with spinal cord injuries: concepts to inform community integration and community rehabilitation	2011	Pubmed
Washburn	Descriptive epidemiology of physical activity in university graduates with locomotor disabilities	1997	Pubmed
Oess	Design and evaluation of a low-cost instrumented glove for hand function assessment	2012	Pubmed
Harrow	Design and evaluation of a stand-up motorized prone cart.	2007	Pubmed
Malassigné	Design of the advanced commode-shower chair for spinal cord-injured individuals	2000	Pubmed
Lindsey	Designing patient education materials to increase independence	1995	Pubmed
Tederko	Determinants of health knowledge and health perceptions from the perspective of health-related education of patients with spinal cord injury: a systematic review	2017	Pubmed
Horn	Determinants of self-efficacy among persons with spinal cord injuries	1998	Pubmed
Tate	Determining differences in post discharge outcomes among catastrophically and noncatastrophically sponsored outpatients with spinal cord injury	1994	Pubmed
Lee	Determining metabolic equivalent values of physical activities for persons with paraplegia	2010	Pubmed
Manns	Determining the relation between quality of life, handicap, fitness, and physical activity for persons with spinal cord injury	1999	Pubmed
Slavin	Developing a contemporary functional outcome measure for spinal cord injury research.	2010	Pubmed
Chen	Developing an ICF core set for sub-acute stages of spinal cord injury in Taiwan: a preliminary study	2015	Pubmed
Belliveau	Developing Artificial Neural Network Models to Predict Functioning One Year After Traumatic Spinal Cord Injury	2016	Pubmed
Glazeroff	Developing direction on new streets: rehabilitating the street person	1978	Pubmed
Noreau	Development and assessment of a community follow-up questionnaire for the Rick Hansen spinal cord injury registry	2013	Pubmed
Jette	Development and initial evaluation of the spinal cord injury-functional index	2012	Pubmed
Fekete	Development and validation of a self-report version of the Spinal Cord Independence Measure (SCIM III).	2013	Pubmed
Post	Development and validation of IMPACT-S, an ICF-based questionnaire to measure activities and participation	2008	Pubmed
de Groot	Development and validation of prognostic models designed to predict wheelchair skills at discharge from spinal cord injury rehabilitation	2010	Pubmed
Invernizzi	Development and validation of the Italian version of the Spinal Cord Independence Measure III.	2010	Pubmed
van Langeveld	Development of a classification of physical, occupational, and sports therapy interventions to document mobility and self-care in spinal cord injury rehabilitation	2008	Pubmed
Pot	Development of a needs assessment system in rehabilitation	1999	Pubmed
Pot	Development of a needs assessment system in rehabilitation.	1999	Pubmed
Bieri	Development of a new assessment of effort and assistance in standing pivot transfers with functional electrical stimulation	2004	Pubmed
Fliess-Douer	Development of a new scale for perceived self-efficacy in manual wheeled mobility: a pilot study	2011	Pubmed
McDonough	Development of a self-report physical function instrument for disability assessment: item pool construction and factor analysis	2013	Pubmed
Marino	Development of a short-form Quadriplegia Index of Function scale	1999	Pubmed
Smith	Development of an upper extremity FES system for individuals with C4 tetraplegia	1996	Pubmed
Siegler	Development of complications during rehabilitation	1994	Pubmed
Koontz	Development of custom measurement system for biomechanical evaluation of independent wheelchair transfers	2011	Pubmed
Kalsi-Ryan	Development of the Graded Redefined Assessment of Strength, Sensibility and Prehension (GRASSP): reviewing measurement specific to the upper limb in tetraplegia	2012	Pubmed
Post	Development of the International Spinal Cord Injury Activities and Participation Basic Data Set	2016	Pubmed
Curtis	Development of the Wheelchair User's Shoulder Pain Index (WUSPI)	1995	Pubmed
Sprigle	Development of valid and reliable measures of postural stability	2007	Pubmed
Friesen	Development, construction, and content validation of a questionnaire to test mobile shower commode usability	2015	Pubmed
Wadhwa	Development, validity and reliability of the 'Sitting Balance Measure' (SBM) in spinal cord injury	2016	Pubmed
Majnemer	Developmental and functional abilities in children with cerebral palsy as related to pattern and level of motor function	2010	Pubmed
Botticello	Differences in the Community Built Environment Influence Poor Perceived Health Among Persons With Spinal Cord Injury	2015	Pubmed
Cruz-Almeida	Differentiation between pain-related interference and interference caused by the functional impairments of spinal cord injury	2009	Pubmed
Hampton	Dimensions of quality of life for Chinese adults with spinal cord injury: a qualitative study	2004	Pubmed
Krause	Dimensions of subjective well-being after spinal cord injury: an empirical analysis by gender and race/ethnicity	1998	Pubmed
Ruff	Directed rehabilitation reduces pain and depression while increasing independence and satisfaction with life for patients with paraplegia due to epidural metastatic spinal cord compression	2007	Pubmed
Ville	Disability and a sense of community belonging. A study among tetraplegic spinal-cord-injured persons in France	2003	Pubmed
Botticello	Disability and the built environment: an investigation of community and neighborhood land uses and participation for physically impaired adults	2014	Pubmed
Hoenig	Disability fingerprints: patterns of disability in spinal cord injury and multiple sclerosis differ	1999	Pubmed
DeVivo	Discharge disposition from model spinal cord injury care system rehabilitation programs	1999	Pubmed
Imms	Diversity of participation in children with cerebral palsy	2008	Pubmed
Bombardier	Do preinjury alcohol problems predict poorer rehabilitation progress in persons with spinal cord injury?	2004	Pubmed
Harvey	Does parent report measure performance? A study of the construct validity of the Functional Mobility Scale	2010	Pubmed
Gagnon	Does upper-limb muscular demand differ between preferred and nonpreferred sitting pivot transfer directions in individuals with a spinal cord injury?	2009	Pubmed
Escorpizo	Domain sets and measurement instruments on participation and environmental factors in spinal cord injury research	2011	Pubmed
Marino	Domains of outcomes in spinal cord injury for clinical trials to improve neurological function	2007	Pubmed
Anderson	Domain-specific satisfaction in adults with pediatric-onset spinal cord injuries	2003	Pubmed
Waters	Donal Munro Lecture: Functional and neurologic recovery following acute SCI.	1998	Pubmed
Hara	Dorsal wrist joint pain in tetraplegic patients during and after rehabilitation	2003	Pubmed
Nelson	Durable medical equipment for children with spinal cord dysfunction: implications of age and level of injury	2007	Pubmed
Post	Dutch interview version of the Barthel Index evaluated in patients with spinal cord injuries	1995	Pubmed
Osterthun	Dutch-Flemish Spinal Cord Society. Characteristics, length of stay and functional outcome of patients with spinal cord injury in Dutch and Flemish rehabilitation centres.	2009	Pubmed
Osebold	Dynamics of hip joint remodeling after Chiari osteotomy. 10 patients with neuromuscular disease followed for 8 years	1997	Pubmed
Sisto	Dynamometry testing in spinal cord injury	2007	Pubmed
Grandas	Dyspnea during daily activities in chronic spinal cord injury	2005	Pubmed
Wangdell	Early Active Rehabilitation After Grip Reconstructive Surgery in Tetraplegia	2016	Pubmed
Kiwerski	Early anterior decompression and fusion for crush fractures of cervical vertebrae	1993	Pubmed
Saboe	Early predictors of functional independence 2 years after spinal cord injury	1997	Pubmed
Nemunaitis	Early Predictors of Functional Outcome After Trauma	2016	Pubmed
Sumida	Early rehabilitation effect for traumatic spinal cord injury	2001	Pubmed
Scivoletto	Early versus delayed inpatient spinal cord injury rehabilitation: an Italian study	2005	Pubmed
Mackelprang	Ecological factors in rehabilitation of patients with severe spinal cord injuries	1987	Pubmed
Bodner	Editors' note	2014	Pubmed
Brillhart	Education as the key to rehabilitation	1989	Pubmed
Brillhart	Education as the key to rehabilitation.	1989	Pubmed
Hart	Educational interests of individuals with spinal cord injury living in the community: medical, sexuality, and wellness topics	1996	Pubmed
Dudgeon	Educational participation of children with spinal cord injury	1997	Pubmed
Hart	Educational interests of individuals with spinal cord injury living in the community: medical, sexuality, and wellness topics.	1996	Pubmed
Wang	Effect on the activities of daily life of the patients with traumatic spinal cord injury treated by the paraplegia-triple-needling method	2012	Pubmed
Algood	Effect of a pushrim-activated power-assist wheelchair on the functional capabilities of persons with tetraplegia	2005	Pubmed
Logothetis	Effect of abiraterone acetate and prednisone compared with placebo and prednisone on pain control and skeletal-related events in patients with metastatic castration-resistant prostate cancer: exploratory analysis of data from the COU-AA-301 randomised trial	2012	Pubmed
Furusawa	Effect of age on bowel management in traumatic central cord syndrome	2012	Pubmed
DiCarlo	Effect of arm ergometry training on wheelchair propulsion endurance of individuals with quadriplegia	1988	Pubmed
Yang	Effect of backrest height on wheelchair propulsion biomechanics for level and uphill conditions	2011	Pubmed
Tsuchiya	Effect of Dual Therapy with Botulinum Toxin A Injection and Electromyography-controlled Functional Electrical Stimulation on Active Function in the Spastic Paretic Hand	2016	Pubmed
Jung	Effect of pre-exercise carbohydrate ingestion on substrate consumption in persons with spinal cord injury	2009	Pubmed
Lamontagne	Effect of rehabilitation length of stay on outcomes in individuals with traumatic brain injury or spinal cord injury: a systematic review protocol	2013	Pubmed
Aissaoui	Effect of seat cushion on dynamic stability in sitting during a reaching task in wheelchair users with paraplegia	2001	Pubmed
Yang	Effect of selective posterior rhizotomy on transverse myelitis in a patient with systemic lupus erythematosus	2002	Pubmed
Blanchard-Dauphin	Effect of spasticity on functional capacity in spinal cord injuries: value of visual analogue scale (preliminary study)	2001	Pubmed
de Groot	Effect of training intensity on physical capacity, lipid profile and insulin sensitivity in early rehabilitation of spinal cord injured individuals	2003	Pubmed
de Groot	Effect of training intensity on physical capacity, lipid profile and insulin sensitivity in early rehabilitation of spinal cord injured individuals.	2003	Pubmed
Dallmeijer	Effect of training on physical capacity and physical strain in persons with tetraplegia	1997	Pubmed
Bussmann	Effect of wearing an activity monitor on the amount of daily manual wheelchair propulsion in persons with spinal cord injury	2010	Pubmed
Liu	EFFECTIVENESS OF APONEUROSIS BRISEMEN FOR TREATMENT OF SPASTIC PALSY AFTER SPINAL CORD INJURY	2014	Pubmed
Wolf	Effectiveness of functional retraining for patients with quadriplegia	1971	Pubmed
Soler	Effectiveness of transcranial direct current stimulation and visual illusion on neuropathic pain in spinal cord injury	2010	Pubmed
Williams	Effects of a static bicycling programme on the functional ability of young people with cerebral palsy who are non-ambulant	2007	Pubmed
Wilson	Effects of assistive technology on functional decline in people aging with a disability	2009	Pubmed
Nash	Effects of circuit resistance training on fitness attributes and upper-extremity pain in middle-aged men with paraplegia	2007	Pubmed
Sipski	Effects of gender on neurologic and functional recovery after spinal cord injury.	2004	Pubmed
Kay	Effects of gender on inpatient rehabilitation outcomes in the elderly with incomplete paraplegia from nontraumatic spinal cord injury	2010	Pubmed
Feng	Effects of hyperbaric oxygen therapy on depression and anxiety in the patients with incomplete spinal cord injury (a STROBE-compliant article)	2017	Pubmed
Kemp	Effects of reduction in shoulder pain on quality of life and community activities among people living long-term with SCI paraplegia: a randomized control trial	2011	Pubmed
Lu	Effects of training on upper limb function after cervical spinal cord injury: a systematic review	2015	Pubmed
Devillard	Effects of training programs for spinal cord injury	2007	Pubmed
Sagawa	Effects of wheelchair mass on the physiologic responses, perception of exertion, and performance during various simulated daily tasks	2010	Pubmed
Nance	Efficacy and safety of tizanidine in the treatment of spasticity in patients with spinal cord injury. North American Tizanidine Study Group	1994	Pubmed
Peckham	Efficacy of an implanted neuroprosthesis for restoring hand grasp in tetraplegia: a multicenter study	2001	Pubmed
Chipman	Efficacy of dantrolene sodium in the treatment of spasticity	1974	Pubmed
Nakamura	Efficacy of traditional herbal medicine, Yokukansan on patients with neuropathic pain	2009	Pubmed
Ejeskär	Elbow extension	2002	Pubmed
Jaffe	Elective bilateral above the knee amputation in T4-complete spinal cord injury: a case report	2008	Pubmed
Kohlmeyer	Electrical stimulation and biofeedback effect on recovery of tenodesis grasp: a controlled study.	1996	Pubmed
Carroll	Electrical stimulation for restoring independent feeding in a man with quadriplegia.	1993	Pubmed
Gronley	Electromyographic and kinematic analysis of the shoulder during four activities of daily living in men with C6 tetraplegia	2000	Pubmed
Rigby	Electronic aids to daily living and quality of life for persons with tetraplegia.	2011	Pubmed
Verdonck	Electronic aids to daily living: be able to do what you want	2011	Pubmed
Efthimiou	Electronic assistive devices: their impact on the quality of life of high level quadriplegic persons	1981	Pubmed
Brudny	EMG feedback therapy: review of treatment of 114 patients	1976	Pubmed
Anderson	Employment outcomes of adults who sustained spinal cord injuries as children or adolescents	2002	Pubmed
Jakob	EM-SCI Study Group. Difficulty of elderly SCI subjects to translate motor recovery--"body function"--into daily living activities	2009	Pubmed
Lynch	Energy Cost of Lower Body Dressing, Pop-Over Transfers, and Manual Wheelchair Propulsion in People with Paraplegia Due to Motor-Complete Spinal Cord Injury.	2015	Pubmed
Collins	Energy cost of physical activities in persons with spinal cord injury	2010	Pubmed
Forrest	Energy cost of the case Western reserve standing neuroprosthesis.	2007	Pubmed
Tanhoffer	Energy expenditure in individuals with spinal cord injury quantified by doubly labeled water and a multi-sensor armband	2015	Pubmed
Merkel	Energy expenditure in patients with low-, mid-, or high-thoracic paraplegia using Scott-Craig knee-ankle-foot orthoses	1985	Pubmed
Cooper	Engineering better wheelchairs to enhance community participation	2006	Pubmed
Wangdell	Enhanced independence: experiences after regaining grip function in people with tetraplegia	2013	Pubmed
Chen	Enhancement of operational efficiencies for people with high cervical spinal cord injuries using a flexible integrated pointing device apparatus	2006	Pubmed
Forchheimer	Enhancing community re-integration following spinal cord injury	2004	Pubmed
Tsai	Environmental barriers and social participation in individuals with spinal cord injury.	2017	Pubmed
Hammel	Environmental barriers and supports to everyday participation: a qualitative insider perspective from people with disabilities	2015	Pubmed
Van Laere	Environmental control and social integration of a high-lesion tetraplegic patient: case report	1986	Pubmed
Woods	Environmental control systems in a spinal injuries unit: a review of 10 years' experience	1990	Pubmed
McDonald	Environmental control unit utilization by high-level spinal cord injured patients	1989	Pubmed
Lysack	Environmental factors and their role in community integration after spinal cord injury	2007	Pubmed
Whiteneck	Environmental factors and their role in participation and life satisfaction after spinal cord injury	2004	Pubmed
Smith	Equating rehabilitation outcome scales: developing common metrics	2004	Pubmed
Cowley	Equipment and modifications that enabled infant child-care by a mother with C8 tetraplegia: a case report	2007	Pubmed
McGee	Equipment and transfer techniques used by C6 quadriplegic patients	1977	Pubmed
Cardenas	Etiology and incidence of rehospitalization after traumatic spinal cord injury: a multicenter analysis	2004	Pubmed
Wirz	European Multicenter Study of Spinal Cord Injury (EMSCI) Network. Recovery of sensorimotor function and activities of daily living after cervical spinal cord injury: the influence of age	2015	Pubmed
Hartoonian	Evaluating a spinal cord injury-specific model of depression and quality of life.	2014	Pubmed
Freeman	Evaluating neurorehabilitation: lessons from routine data collection	2005	Pubmed
Whiteneck	Evaluating outcome after spinal cord injury: what determines success? 1996 Donald Munro Lecture	1997	Pubmed
Glaesener	Evaluating the independence of paraplegic patients at the end of the first rehabilitation--a multicenter project of computer-assisted quality control in rehabilitation	1992	Pubmed
Cooper	Evaluation of a pushrim-activated, power-assisted wheelchair	2001	Pubmed
Laffont	Evaluation of a stair-climbing power wheelchair in 25 people with tetraplegia	2008	Pubmed
Hammel	Evaluation of a vocational robot with a quadriplegic employee	1992	Pubmed
Pillastrini	Evaluation of an occupational therapy program for patients with spinal cord injury	2008	Pubmed
Edebol-Tysk	Evaluation of care-load for individuals with spastic tetraplegia	1989	Pubmed
Imamura	Evaluation of central paralysis	1997	Pubmed
Tsang	Evaluation of custom energy expenditure models for SenseWear armband in manual wheelchair users	2015	Pubmed
Scranton	Evaluation of functional levels of patients during and following rehabilitation.	1970	Pubmed
Li	Evaluation of functional outcomes of physical rehabilitation and medical complications in spinal cord injury victims of the Sichuan earthquake	2012	Pubmed
Mulcahey	Evaluation of newly developed item banks for child-reported outcomes of participation following spinal cord injury	2012	Pubmed
Knox	Evaluation of the functional effects of a course of Bobath therapy in children with cerebral palsy: a preliminary study	2002	Pubmed
Calmels	Evaluation of the handicap and the quality of life in spinal cord injuries: study in a population of 58 patients living at home	2003	Pubmed
Karimi	Evaluation of the stability of normal subjects and patients with Perthes and spinal cord injury disorders during short and long periods of time	2013	Pubmed
Bérard	Evaluation of the treatments for the cerebral palsy child	2006	Pubmed
van Tuijl	Evaluation of upper extremity motor function tests in tetraplegics	2002	Pubmed
Solanki	Evaluation of volitional control of hand with vertical force assist device for high tetraplegia	2012	Pubmed
Ostensjø	Everyday functioning in young children with cerebral palsy: functional skills, caregiver assistance, and modifications of the environment	2003	Pubmed
Zehr	Evidence-based risk assessment and recommendations for physical activity clearance: stroke and spinal cord injury	2011	Pubmed
Seki	Examination of living environment upon return to home for patients with cervical spinal cord injury--report of a case	2002	Pubmed
McIntyre	Examining the effectiveness of intrathecal baclofen on spasticity in individuals with chronic spinal cord injury: a systematic review	2014	Pubmed
Rapport	Executive functioning and predictors of falls in the rehabilitation setting	1998	Pubmed
Martin Ginis	Exercise and sport for persons with spinal cord injury	2012	Pubmed
Barfield	Exercise Intensity During Power Wheelchair Soccer	2016	Pubmed
Nooijen	Exercise self-efficacy in persons with spinal cord injury: psychometric properties of the Dutch translation of the Exercise Self-Efficacy Scale	2013	Pubmed
Zwinkels	Exercise training programs to improve hand rim wheelchair propulsion capacity: a systematic review	2014	Pubmed
Allen-Wright	Expanding health promotion to individuals with spinal cord injuries	1999	Pubmed
McColl	Expectations of health, independence, and quality of life among aging spinal cord-injured adults	1999	Pubmed
Masini	Experience with a spinal cord unit in Brasilia, Brazil	1990	Pubmed
Dumrese	Experience with the orthotic provision of the quadraplegics (author's transl)	1974	Pubmed
Lundström	Experiences of participation in everyday occupations among persons aging with a tetraplegia	2015	Pubmed
Ballert	Explanatory power does not equal clinical importance: study of the use of the Brief ICF Core Sets for Spinal Cord Injury with a purely statistical approach.	2012	Pubmed
Tóth	Exploration of the goals for the quality of life in primary rehabilitation after spinal cord injury	2013	Pubmed
Rohde	Exploratory study of perceived quality of life with implanted standing neuroprostheses.	2012	Pubmed
Mortenson	Exploratory Validation of a Multidimensional Power Wheelchair Outcomes Toolkit	2015	Pubmed
Hammell	Exploring quality of life following high spinal cord injury: a review and critique.	2004	Pubmed
O'Connor	Exploring rating scale responsiveness: does the total score reflect the sum of its parts?	2004	Pubmed
Miyazaki	Extensive simultaneous multisegment laminectomy for myelopathy due to the ossification of the posterior longitudinal ligament in the cervical region	1986	Pubmed
Barclay	Facilitators and barriers to social and community participation following spinal cord injury	2016	Pubmed
King	Facing the future	1981	Pubmed
Bagley	Factor- and item-level analyses of the 38-item activities scale for kids-performance	2011	Pubmed
Wee	Factors affecting measures of activities and participation in persons with mobility impairment	2009	Pubmed
Roehrig	Factors affecting shoulder pain in adolescents and young adults with spina bifida	2008	Pubmed
Kennedy	Factors associated with acute and chronic pain following traumatic spinal cord injuries	1997	Pubmed
Suriá Martínez	Factors associated with empowerment in people with a spinal cord injury due to traffic accidents	2015	Pubmed
Jain	Factors associated with health-related quality of life in chronic spinal cord injury	2007	Pubmed
Warren	Factors associated with life satisfaction among a sample of persons with neurotrauma	1996	Pubmed
Krause	Factors associated with risk for subsequent injuries after traumatic spinal cord injury	2004	Pubmed
Sinnott	Factors associated with thoracic spinal cord injury, lesion level and rotator cuff disorders	2000	Pubmed
Beck	Factors influencing functional outcome and discharge disposition after thoracic spinal cord injury	1999	Pubmed
Burnside	Factors influencing readmission to hospital. I. Tetraplegia	1976	Pubmed
George	Failure of methylprednisolone to improve the outcome of spinal cord injuries	1995	Pubmed
Siegrist	Fair opportunities, social productivity and wellbeing in disability: Towards a theoretical foundation	2016	Pubmed
Nelson	Fall-related fractures in persons with spinal cord impairment: a descriptive analysis	2003	Pubmed
Finlayson	Falls, aging, and disability	2010	Pubmed
McGowan	Family functioning and functional independence in spinal cord injury adjustment	1987	Pubmed
Kapidzić-Duraković	Family participation in determination of FIM and Barthel indices.	2006	Pubmed
Kreuter	Family situation and psychosocial issues including problems that impact on partnership or resettlement in the home and into society.	1999	Pubmed
Barat	Fatigue after spinal cord injury	2006	Pubmed
Samaniego	Favorable outcome from a locked-in state despite extensive pontine infarction by MRI	2009	Pubmed
van Langeveld	Feasibility of a classification system for physical therapy, occupational therapy, and sports therapy interventions for mobility and self-care in spinal cord injury rehabilitation	2008	Pubmed
Dahl	Feeding and nutritional characteristics in children with moderate or severe cerebral palsy	1996	Pubmed
Bobroff	Femoral anteversion and neck-shaft angle in children with cerebral palsy	1999	Pubmed
Newham	FES cycling. Acta Neurochir Suppl	2007	Pubmed
van Hedel	Fighting for each segment: estimating the clinical value of cervical and thoracic segments in SCI.	2006	Pubmed
Linacre	FIM levels as ordinal categories	2000	Pubmed
Middleton	Five additional mobility and locomotor items to improve responsiveness of the FIM in wheelchair-dependent individuals with spinal cord injury.	2006	Pubmed
Colyer	Flexor pollicis longus tenodesis in tetraplegia at the sixth cervical level. A prospective evaluation of functional gain	1981	Pubmed
Bloemen-Vrencken	Follow-up care for persons with spinal cord injury living in the community: a systematic review of interventions and their evaluation	2005	Pubmed
Franceschini	Follow-up in persons with traumatic spinal cord injury: questionnaire reliability	2006	Pubmed
Hallin	Follow-up of paraplegics and tetraplegics after comprehensive rehabilitation	1968	Pubmed
Exner	Follow-up of spinal injuries with transverse spinal cord lesion	1994	Pubmed
Hall	Follow-up study of individuals with high tetraplegia (C1-C4) 14 to 24 years postinjury	1999	Pubmed
Scovil	Follow-up study of spinal cord injured patients after discharge from inpatient rehabilitation in Nepal in 2007	2012	Pubmed
Allen	Follow-up study of wrist-driven flexor-hinge-splint use.	1971	Pubmed
Stucki	Four steps to follow when documenting functioning with the International Classification of Functioning, Disability and Health	2017	Pubmed
Albert	French Physical and Rehabilitation Medicine Society; French Federation of PRM. Physical and rehabilitation medicine (PRM) care pathways: "spinal cord injury".	2012	Pubmed
Brown	From contemporary rehabilitation to restorative neurology	2012	Pubmed
Wangdell	From regained function to daily use: experiences of surgical reconstruction of grip in people with tetraplegia	2014	Pubmed
McCormack	From the clinic: trapeze strap	1975	Pubmed
Rubinelli	From the person's perspective: Perceived problems in functioning among individuals with spinal cord injury in Switzerland	2016	Pubmed
Machado	Functional (in)dependence in the dependent relationship of quadriplegic men with their (un)replaceable parents/caregivers].	2010	Pubmed
Sinha	Functional ability level development and validation: providing clinical meaning for Spinal Cord Injury Functional Index scores	2015	Pubmed
Wang	Functional ability, perceived exertion and employment of the individuals with spinal cord lesion in Taiwan	2002	Pubmed
Symington	Functional achievement in a patient with C5—spared quadriparesis	1970	Pubmed
Dallolio	Functional and clinical outcomes of telemedicine in patients with spinal cord injury	2008	Pubmed
Johnstone	Functional and cosmetic outcome of surgery for cerebral palsy in the upper limb.	2003	Pubmed
Ota	Functional assessment of patients with spinal cord injury: measured by the motor score and the Functional Independence Measure.	1996	Pubmed
Sharif-Alhoseini	Functional assessment of SCI patients by FIM: yes or no?	2015	Pubmed
Yaşar	Functional assessment of SCI patients by FIM: yes or no?	2015	Pubmed
Hui	Functional assessment of the shoulder following latissimus dorsi muscle donation in the handicapped	1999	Pubmed
Thompson	Functional changes in persons aging with spinal cord injury	1999	Pubmed
Lapointe	Functional community ambulation requirements in incomplete spinal cord injured subjects	2001	Pubmed
Coura	Functional disability of adult individuals with spinal cord injury and its association with socio-demographic characteristics	2012	Pubmed
Schindler	Functional effect of bilateral tendon transfers on a person with C-5 quadriplegia	1994	Pubmed
Sipski	Functional electrical stimulation bicycle ergometry: patient perceptions	1989	Pubmed
Mayson	Functional electrical stimulation cycling in youth with spinal cord injury: A review of intervention studies	2014	Pubmed
Handa	Functional electrical stimulation for the control of the upper extremities	1987	Pubmed
Degnan	Functional electrical stimulation in tetraplegic patients to restore hand function	2002	Pubmed
Pfurtscheller	Functional electrical stimulation instead of surgery? Improvement of grasping function with FES in a patient with C5 tetraplegia	2005	Pubmed
Faghri	Functional electrical stimulation leg cycle ergometer exercise: training effects on cardiorespiratory responses of spinal cord injured subjects at rest and during submaximal exercise.	1992	Pubmed
Stanic	Functional electrical stimulation of abdominal muscles to augment tidal volume in spinal cord injury	2000	Pubmed
Thorsen	Functional electrical stimulation reinforced tenodesis effect controlled by myoelectric activity from wrist extensors	2006	Pubmed
Gschwind	Functional electrical stimulation: a new horizon for quadriplegic patients	2000	Pubmed
Freeman	Functional electrical stimulation: recent developments for the rehabilitation of spinal injured patients	1987	Pubmed
Popovic	Functional electrical therapy: retraining grasping in spinal cord injury	2006	Pubmed
Inmann	Functional evaluation of natural sensory feedback incorporated in a hand grasp neuroprosthesis	2004	Pubmed
Wijman	Functional evaluation of quadriplegic patients using a hand neuroprosthesis.	1990	Pubmed
Toh	Functional evaluation using motor scores after cervical spinal cord injuries.	1998	Pubmed
van Cooten	Functional hindrance due to spasticity in individuals with spinal cord injury during inpatient rehabilitation and 1 year thereafter	2015	Pubmed
Haisma	Functional independence and health-related functional status following spinal cord injury: a prospective study of the association with physical capacity	2008	Pubmed
Jongjit	Functional independence and rehabilitation outcome in traumatic spinal cord injury	2004	Pubmed
Dahlberg	Functional independence in persons with spinal cord injury in Helsinki	2003	Pubmed
Welch	Functional independence in quadriplegia: critical levels.	1986	Pubmed
Opara	Functional marker "Repty" for evaluation of independence in patients with paraplegia	1997	Pubmed
Mulcahey	Functional neuromuscular stimulation: outcomes in young people with tetraplegia	1994	Pubmed
Parke	Functional outcome after delivery of intrathecal baclofen	1989	Pubmed
Polinder	Functional outcome at 2.5, 5, 9, and 24 months after injury in the Netherlands	2007	Pubmed
Heinemann	Functional outcome following spinal cord injury. A comparison of specialized spinal cord injury center vs general hospital short-term care	1989	Pubmed
Curt	Functional outcome following spinal cord injury: significance of motor-evoked potentials and ASIA scores	1998	Pubmed
Di Scala	Functional outcome in children with traumatic brain injury. Agreement between clinical judgment and the functional independence measure	1992	Pubmed
Boviatsis	Functional outcome of intrathecal baclofen administration for severe spasticity	2005	Pubmed
Schönherr	Functional outcome of patients with spinal cord injury: rehabilitation outcome study	1999	Pubmed
Harvey	Functional outcomes attained by T9-12 paraplegic patients with the walkabout and the isocentric reciprocal gait orthoses	1997	Pubmed
Lo	Functional Priorities in Persons with Spinal Cord Injury: Using Discrete Choice Experiments To Determine Preferences	2016	Pubmed
Collinger	Functional priorities, assistive technology, and brain-computer interfaces after spinal cord injury	2013	Pubmed
Collinger	Functional priorities, assistive technology, and brain-computer interfaces afterspinal cord injury	2013	Pubmed
MacKenzie	Functional recovery and medical costs of trauma: an analysis by type and severity of injury	1988	Pubmed
Choksi	Functional recovery in children and adolescents with spinal cord injury	2010	Pubmed
Anderson	Functional Recovery Outcome Measures Work Group. Functional recovery measures for spinal cord injury: an evidence-based review for clinical practice and research.	2008	Pubmed
Hansen	Functional rehabilitation of the paraplegic	1977	Pubmed
Giuffrida	Functional restoration of elbow extension after spinal-cord injury using a neural network-based synergistic FES controller	2005	Pubmed
Velozo	Functional scale discrimination at admission and discharge: Rasch analysis of the Level of Rehabilitation Scale-III	1995	Pubmed
Pajareya	Functional skills after rehabilitation for patients with spinal cord injury.	1998	Pubmed
Dzidic	Functional skills after the rehabilitation of spinal cord injury patients; observation period of 3 years	1997	Pubmed
Taricco	Functional status in patients with spinal cord injury: a new standardized measurement scale. Gruppo Interdisciplinare Valutazione Interventi Riabilitativi	2000	Pubmed
Harada	Functional status outcomes in rehabilitation. Implications for prospective payment	1993	Pubmed
Ahl	Functional therapy for children with cerebral palsy: an ecological approach	2005	Pubmed
Bar-On	Functional, neurological and surgical aspects of the tetraplegic's hand	1993	Pubmed
Kuo	Functioning and disability analysis of patients with traumatic brain injury and spinal cord injury by using the world health organization disability assessment schedule 2.0.	2015	Pubmed
Kirchberger	Functioning and disability in spinal cord injury from the consumer perspective: an international qualitative study using focus groups and the ICF	2010	Pubmed
Graves	Gain in functional ability during medical rehabilitation as related to rehabilitation process indices and neurologic measures	1999	Pubmed
Freehafer	Gaining independence in tetraplegia. Cleveland technique	1998	Pubmed
van Hedel	Gait speed in relation to categories of functional ambulation after spinal cord injury	2009	Pubmed
Greenwald	Gender-related differences in acute rehabilitation lengths of stay, charges, and functional outcomes for a matched sample with spinal cord injury: a multicenter investigation	2001	Pubmed
Fitzharris	General health status and functional disability following injury in traffic crashes	2007	Pubmed
Simone	Generic ABILHAND questionnaire can measure manual ability across a variety of motor impairments	2011	Pubmed
Botticello	Geographic variation in participation for physically disabled adults: the contribution of area economic factors to employment after spinal cord injury	2012	Pubmed
van Drongelen	Glenohumeral contact forces and muscle forces evaluated in wheelchair-related activities of daily living in able-bodied subjects versus subjects with paraplegia and tetraplegia	2005	Pubmed
Raymond	Glucose tolerance and physical activity level in people with spinal cord injury.	2010	Pubmed
Fridén	Good possibilities of reconstructing grip function in tetraplegia. Care measures in a life-long patient perspective after cervical spinal cord injuries	2010	Pubmed
Shimada	Grasping power by means of functional electrical stimulation in a case of C6 complete tetraplegia	2003	Pubmed
Buchholz	Greater daily leisure time physical activity is associated with lower chronic disease risk in adults with spinal cord injury	2009	Pubmed
Dutton	Guidelines for using both activity and exercise	1989	Pubmed
Thibodaux	Habitus and the embodiment of disability through lifestyle	2005	Pubmed
Chodoroff	Hajdu-Cheney syndrome: rehabilitation after decompression of cervical spinal cord compromise	1984	Pubmed
Harvey	Hand function of C6 and C7 tetraplegics 1 - 16 years following injury.	2001	Pubmed
Bell	Hand skill measurement: a gauge for treatment.	1976	Pubmed
Pisotta	Hand-in-hand advances in biomedical engineering and sensorimotor restoration	2015	Pubmed
Stambrook	Head injury and spinal cord injury: differential effects on psychosocial functioning	1991	Pubmed
Kreuter	Health and quality of life of persons with spinal cord lesion in Australia and Sweden	2005	Pubmed
Fernhall	Health implications of physical activity in individuals with spinal cord injury: a literature review	2008	Pubmed
Bloemen-Vrencken	Health problems of persons with spinal cord injury living in the Netherlands	2005	Pubmed
Getchel	Health program maintenance by males with spinal cord injury	1976	Pubmed
Whitehurst	Health state descriptions, valuations and individuals' capacity to walk: a comparative evaluation of preference-based instruments in the context of spinal cord injury	2016	Pubmed
Fjermestad	Health survey of adults with hereditary spastic paraparesis compared to population study controls	2016	Pubmed
Curtis	Health, vocational, and functional status in spinal cord injured athletes and nonathletes	1986	Pubmed
Njoki	Health-promotion needs of youth with a spinal cord injury in South Africa	2007	Pubmed
Dorsett	Health-related outcomes of people with spinal cord injury--a 10 year longitudinal study	2008	Pubmed
Saadat	Health-related quality of life among individuals with long-standing spinal cord injury: a comparative study of veterans and non-veterans	2010	Pubmed
Tapia	Health-related quality of life and economic impact of urinary incontinence due to detrusor overactivity associated with a neurologic condition: a systematic review	2013	Pubmed
Carlozzi	Health-related quality of life in caregivers of individuals with traumatic brain injury: development of a conceptual model	2015	Pubmed
Israeli-Mendlovic	Heart rate and heart rate variability parameters at rest, during activity and passive standing among children with cerebral palsy GMFCS IV-V.	2014	Pubmed
Hayes	Heart rate as a predictor of energy expenditure in people with spinal cord injury	2005	Pubmed
Moslavac	Hemodialysis-associated amyloidosis with cervical spinal cord compression and incomplete tetraplegia: a case report	2007	Pubmed
Gibson	Heterotopic ossification as a complication of toxic epidermal necrolysis	1997	Pubmed
Cipriano	Heterotopic ossification following traumatic brain injury and spinal cord injury	2009	Pubmed
Girard	High prevalence of nosocomial infections in rehabilitation units accounted for by urinary tract infections in patients with spinal cord injury	2006	Pubmed
Dieckmann	High-dose epinephrine in pediatric out-of-hospital cardiopulmonary arrest	1995	Pubmed
Collinger	High-performance neuroprosthetic control by an individual with tetraplegia	2013	Pubmed
Abel	Hindrance of spasticity after spinal cord injury	2015	Pubmed
Biering-Sørensen	Home aids and personal assistance 10-45 years after spinal cord injury	2009	Pubmed
Huml	Home environment clinic--transition from hospital to home	1986	Pubmed
Huml	Home environment clinic--transition from hospital to home.	1986	Pubmed
Storey	Home nursing care. III. Home care for the mobility disabled--a case study of a spinal cord injury client	1991	Pubmed
Moynahan	Home use of a functional electrical stimulation system for standing and mobility in adolescents with spinal cord injury	1996	Pubmed
Biniek	Home ventilation in neurologic diseases. Survey of 62 patients	1994	Pubmed
Norin	Housing accessibility and its associations with participation among older adults living with long-standing spinal cord injury	2017	Pubmed
McNeese	Houston VA spinal cord injury program: initiating a spinal cord injury program.	1986	Pubmed
Grand	How an American plaintiff's lawyer presents the spinal cord injury resulting from trauma.	1977	Pubmed
Grossman	How can nurses use limit setting to facilitate spinal cord patients' independence?	1997	Pubmed
Côté-Leclerc	How does playing adapted sports affect quality of life of people with mobility limitations? Results from a mixed-method sequential explanatory study	2017	Pubmed
Petrillo	How to equip the quadriplegic patient	1990	Pubmed
Aarabi	Hyperextension cervical spine injuries and traumatic central cord syndrome	2008	Pubmed
Kirchberger	Identification of the most common problems in functioning of individuals with spinal cord injury using the International Classification of Functioning, Disability and Health	2010	Pubmed
Tsai	Immediate Biomechanical Implications of Transfer Component Skills Training on Independent Wheelchair Transfers	2016	Pubmed
Rice	Impact of a wheelchair education protocol based on practice guidelines for preservation of upper-limb function: a randomized trial	2014	Pubmed
Seguin	Impact of age on mortality in patients with acute traumatic spinal cord injury requiring intensive care	2012	Pubmed
Schenk-Rootlieb	Impact of cerebral visual impairment on the everyday life of cerebral palsied children	1993	Pubmed
Rigby	Impact of electronic aids to daily living on the lives of persons with cervical spinal cord injuries	2005	Pubmed
van der Meer	Impact of health problems secondary to SCI one and five years after first inpatient rehabilitation	2017	Pubmed
Burnett	Impact of minority status following traumatic spinal cord injury	2002	Pubmed
Burnett	Impact of minority status following traumatic spinal cord injury.	2002	Pubmed
Mylotte	Impact of nosocomial infection on length of stay and functional improvement among patients admitted to an acute rehabilitation unit	2001	Pubmed
Sahlin	Impact of Organized Sports on Activity, Participation, and Quality of Life in People With Neurologic Disabilities	2015	Pubmed
Tlili	Impact of physical activity on the autonomy and the quality of life of patients with spinal cord injury	2008	Pubmed
Lala	Impact of pressure ulcers on individuals living with a spinal cord injury.	2014	Pubmed
Wang	Impact of pressure ulcers on outcomes in inpatient rehabilitation facilities	2014	Pubmed
Chafetz	Impact of prophylactic thoracolumbosacral orthosis bracing on functional activities and activities of daily living in the pediatric spinal cord injury population	2007	Pubmed
Munce	Impact of quality improvement strategies on the quality of life and well-being of individuals with spinal cord injury: a systematic review protocol	2013	Pubmed
Munce	Impact of quality improvement strategies on the quality of life and well-being of individuals with spinal cord injury: a systematic review protocol	2013	Pubmed
Bravo-Esteban	Impact of specific symptoms of spasticity on voluntary lower limb muscle function, gait and daily activities during subacute and chronic spinal cord injury.	2013	Pubmed
Murray	Impact of spinal cord injury on self-perceived pre- and postmorbid cognitive, emotional and physical functioning	2007	Pubmed
Rice	Impact of the clinical practice guideline for preservation of upper limb function on transfer skills of persons with acute spinal cord injury	2013	Pubmed
Lund	Impact on participation and autonomy questionnaire: internal scale validity of the Swedish version for use in people with spinal cord injury	2007	Pubmed
Postma	Impaired respiratory function and associations with health-related quality of life in people with spinal cord injury	2016	Pubmed
Rodriguez	Impairment, disability, and handicap in multiple sclerosis: a population-based study in Olmsted County, Minnesota	1994	Pubmed
Keith	Implantable functional neuromuscular stimulation in the tetraplegic hand	1989	Pubmed
Mulcahey	Implantation of the Freehand System during initial rehabilitation using minimally invasive techniques	2004	Pubmed
Lam	Implantation of a breathing pacemaker in a tetraplegic patient in Hong Kong	2009	Pubmed
Triolo	Implanted electrical stimulation of the trunk for seated postural stability and function after cervical spinal cord injury: a single case study.	2009	Pubmed
Mulcahey	Implanted functional electrical stimulation hand system in adolescents with spinal injuries: an evaluation	1997	Pubmed
Memberg	Implanted neuroprosthesis for restoring arm and hand function in people with high level tetraplegia	2014	Pubmed
Inmann	Implementation of natural sensory feedback in a portable control system for a hand grasp neuroprosthesis	2004	Pubmed
Chen	Implementing technology-based embedded assessment in the home and community life of individuals aging with disabilities: a participatory research and development study	2014	Pubmed
Young	Implications of elbow arthrodesis for individuals with paraplegia	1993	Pubmed
Iezzoni	Implications of mobility impairment on the diagnosis and treatment of breast cancer	2011	Pubmed
Edwards	Importance of access to research information among individuals with spinal cord injury: results of an evidenced-based questionnaire	2002	Pubmed
Biering-Sørensen	Improved function of the hand in persons with tetraplegia using electric stimulation via implanted electrodes	2000	Pubmed
van Hedel	Improvement in function after spinal cord injury: the black-box entitled rehabilitation	2012	Pubmed
McCarty	Improvement of sleep apnea in a patient with cerebral palsy	2001	Pubmed
Spooren	Improvement of the Van Lieshout hand function test for tetraplegia using a Rasch analysis	2013	Pubmed
Meiners	Improvements in activities of daily living following functional hand surgery for treatment of lesions to the cervical spinal cord: self-assessment by patients.	2002	Pubmed
Buccino	Improving upper limb motor functions through action observation treatment: a pilot study in children with cerebral palsy.	2012	Pubmed
Phonthee	Incidence and factors associated with falls in independent ambulatory individuals with spinal cord injury: a 6-month prospective study	2013	Pubmed
Lannem	Incomplete spinal cord injury, exercise and life satisfaction	2009	Pubmed
Hetz	Increased participation in activities of daily living is associated with lower cholesterol levels in people with spinal cord injury	2009	Pubmed
Frieden	Independence: the ultimate goal of rehabilitation for spinal cord-injured persons	1985	Pubmed
Barbonetti	Independent Association of Vitamin D With Physical Function in People With Chronic Spinal Cord Injury	2016	Pubmed
Weingarden	Independent dressing after spinal cord injury: a functional time evaluation	1989	Pubmed
Mattinson	Independent living for high-lesion quadriplegics	1987	Pubmed
Boschen	Independent living long-term outcome variables in spinal cord injury: a replication of DeJong	1998	Pubmed
DeJong	Independent living outcomes in spinal cord injury: multivariate analyses	1984	Pubmed
DeJong	Independent living: methodology for measuring long-term outcomes	1982	Pubmed
Khalifa	Inducing the quality of home health care theory through the use of grounded theory methodology	1993	Pubmed
Khalifa	Inducing the quality of home health care theory through the use of grounded theory methodology.	1993	Pubmed
Scivoletto	Inflammatory myelopathies and traumatic spinal cord lesions: comparison of functional and neurological outcomes	2008	Pubmed
Kiwerski	Influence of alcohol intake on the course and consequences of spinal cord injury	1992	Pubmed
Mingaila	Influence of complications on independence of patients with spinal cord injury in early rehabilitation	2005	Pubmed
Kloosterman	Influence of gravity compensation on kinematics and muscle activation patterns during reach and retrieval in subjects with cervical spinal cord injury: an explorative study	2010	Pubmed
Anneken	Influence of physical exercise on quality of life in individuals with spinal cord injury.	2010	Pubmed
Ribeiro	Influence of Relative Strength on Functional Independence of Patients With Spinal Cord Injury	2017	Pubmed
McVeigh	Influence of sport participation on community integration and quality of life: a comparison between sport participants and non-sport participants with spinal cord injury.	2009	Pubmed
Kowalczewski	In-home tele-rehabilitation improves tetraplegic hand function	2011	Pubmed
Daverat	Initial factors predicting functional performance in patients with traumatic tetraplegia	1990	Pubmed
Saunders	Injuries and Falls in an Aging Cohort with Spinal Cord Injury: SCI Aging Study	2015	Pubmed
Lin	Injuries during a massive tug-of-war game	2003	Pubmed
Yoshikawa	Innovation in the training for preservation of the functions of the extremities in patients with cervical cord injuries	1983	Pubmed
Wijkstra	Inpatient chronic assisted ventilatory care: a 15-year experience	2003	Pubmed
Adamczyk	Input-output nonlinearities and time delays increase tracking errors in hand grasp neuroprostheses	1996	Pubmed
Chang	Institutional contexts contribute to the low priority given to developing self-care independence in a rehabilitation ward: a qualitative study	2013	Pubmed
Sato	Instruction and practice training of patients with cervical cord injuries for expansion of ADL	1983	Pubmed
Memberg	Instrumented objects for quantitative evaluation of hand grasp	1997	Pubmed
Zwick	Integrating Iyengar yoga into rehab for spinal cord injury	2006	Pubmed
Zwick	Integrating Iyengar yoga into rehab for spinal cord injury.	2006	Pubmed
Jacobs	Integrating the Americans With Disabilities Act of 1990 into client intervention	1992	Pubmed
Buck	Integration of patient exercise/physical therapy in the rehabilitation team	1992	Pubmed
Murai	Intensity modulated stereotactic body radiation therapy for single or multiple vertebral metastases with spinal cord compression	2014	Pubmed
Tang	Interactive development and evaluation of an independently accessible video education system for rehabilitation	1985	Pubmed
Putzke	Interference due to pain following spinal cord injury: important predictors and impact on quality of life	2002	Pubmed
Alander	Intermediate-term outcome of cervical spinal cord-injured patients older than 50 years of age.	1997	Pubmed
Steeves	International Campaign for Cures of Spinal Cord Injury Paralysis. Guidelines for the conduct of clinical trials for spinal cord injury (SCI) as developed by the ICCP panel: clinical trial outcome measures	2007	Pubmed
Li	International classification of functioning, disability and health categories for spinal cord injury nursing in China	2015	Pubmed
Fekete	International Spinal Cord Injury Community Survey (InSCI) group. A Structured Approach to Capture the Lived Experience of Spinal Cord Injury: Data Model and Questionnaire of the International Spinal Cord Injury Community Survey	2017	Pubmed
Biering	International spinal cord injury musculoskeletal basic data set	2012	Pubmed
Maynard	International Standards for Neurological and Functional Classification of Spinal Cord Injury.	1997	Pubmed
Yonenobu	Interobserver and intraobserver reliability of the japanese orthopaedic association scoring system for evaluation of cervical compression myelopathy	2001	Pubmed
Basso	Interrater reliability of the Neuromuscular Recovery Scale for spinal cord injury	2015	Pubmed
Roberts	Interview by Craig Kenny	1998	Pubmed
Hocevar	Intestinal diversion (colostomy or ileostomy) in patients with severe bowel dysfunction following spinal cord injury	2008	Pubmed
Azouvi	Intrathecal baclofen administration for control of severe spinal spasticity: functional improvement and long-term follow-up	1996	Pubmed
Ueta	Intrathecal baclofen for severe spasticity	2008	Pubmed
Lewis	Intrathecal baclofen for severe spasticity secondary to spinal cord injury	1993	Pubmed
Penn	Intrathecal baclofen for severe spinal spasticity	1989	Pubmed
Savoy	Intrathecal baclofen infusion: an innovative approach for controlling spinal spasticity	1993	Pubmed
Armstrong	Intrathecally administered baclofen for treatment of children with spasticity of cerebral origin	1997	Pubmed
McCarthy	Intrinsic balancing in reconstruction of the tetraplegic hand	1997	Pubmed
Sweet	Investigating intermediary variables in the physical activity and quality of life relationship in persons with spinal cord injury	2013	Pubmed
de Groot	Investigation of bias due to loss of participants in a Dutch multicentre prospective spinal cord injury cohort study	2009	Pubmed
de Groot	Investigation of bias due to loss of participants in a Dutch multicentre prospective spinal cord injury cohort study.	2009	Pubmed
Koontz	Investigation of the performance of an ergonomic handrim as a pain-relieving intervention for manual wheelchair users	2006	Pubmed
Behrman	Invited commentary	2009	Pubmed
Norton	Is bed rest an effective treatment modality for pressure ulcers?	2004	Pubmed
Oe	Is extensive cervical laminoplasty an effective treatment for spinal cord sarcoidosis combined with cervical spondylosis?	2009	Pubmed
de Groot	Is manual wheelchair satisfaction related to active lifestyle and participation in people with a spinal cord injury?	2011	Pubmed
Piccardi	Is the patient able to watch TV or read the newspaper? A functional semi-structured scale to observe Hemineglect symptoms in Activities of Daily Living (H-ADL).	2016	Pubmed
Arora	Isolated involvement of the posterior elements in spinal tuberculosis: a review of twenty-four cases	2012	Pubmed
Sullivan	Isolated pelvic ring injuries: functional outcomes following percutaneous, posterior fixation	2015	Pubmed
Malassigné	Iterative design and evaluation of new prone carts for individuals with SCDs:a technical note	2002	Pubmed
Baranoski	Jill Kinmont Boothe: the obstacles and triumphs of living with an SCI	2000	Pubmed
Yarkony	Jones-Hedman walker modification for C7 quadriplegic patient: case study in team cooperation.	1986	Pubmed
Hirayama	Juvenile muscular atrophy of unilateral upper extremity (Hirayama disease)--half-century progress and establishment since its discovery	2008	Pubmed
de los Reyes-Guzmán	Kinematic analysis of the daily activity of drinking from a glass in a population with cervical spinal cord injury	2010	Pubmed
Venturini	Knowing the history and the life conditions of subjects with spinal cord lesions	2006	Pubmed
Venturini	Knowing the history and the life conditions of subjects with spinal cord lesions	2006	Pubmed
Sietsma	Kyphoplasty as treatment for osteoporotic vertebral compression fractures: relatively safe, but still no evidence of functional improvement; a review of the literature	2008	Pubmed
Rowell	Labour market outcomes for people with a spinal cord injury	2010	Pubmed
Kirshblum	Late neurologic recovery after traumatic spinal cord injury	2004	Pubmed
Osborne	Learning from experience	1978	Pubmed
Marshall	Learning to live with paraplegia	1973	Pubmed
Nunnerley	Leaving a spinal unit and returning to the wider community: an interpretative phenomenological analysis	2013	Pubmed
Knight	Leisure-time physical activity and diet quality are not associated in people with chronic spinal cord injury	2011	Pubmed
Maric	Levodopa therapy in incomplete spinal cord injury	2008	Pubmed
Kelly	Life began at 55	1985	Pubmed
Strauss	Life expectancy of children with cerebral palsy	1998	Pubmed
Dunnum	Life satisfaction and spinal cord injury: the patient perspective	1990	Pubmed
Hicken	Life satisfaction following spinal cord and traumatic brain injury: a comparative study	2002	Pubmed
Anderson	Life satisfaction in adults with pediatric-onset spinal cord injuries	2002	Pubmed
Saikkonen	Life situation of spinal cord-injured persons in Central Finland	2004	Pubmed
Cooke	Life without limbs: Technology to the rescue	2016	Pubmed
Ghaisas	Lifestyle changes and pressure ulcer prevention in adults with spinal cord injury in the pressure ulcer prevention study lifestyle intervention	2015	Pubmed
Morita	Lifestyle risk factors for pressure ulcers in community-based patients with spinal cord injuries in Japan	2015	Pubmed
Rohlmann	Lifting up and laying down a weight causes high spinal loads	2013	Pubmed
Kierney	Limb-salvage in reconstruction of recalcitrant pressure sores using the inferiorly based rectus abdominis myocutaneous flap	1998	Pubmed
Takeuchi	Limitation of activities of daily living accompanying reduced neck mobility after laminoplasty preserving or reattaching the semispinalis cervicis into axis	2008	Pubmed
Copes	Linking data from national trauma and rehabilitation registries	1996	Pubmed
Dahlgren	Linking the Klein-Bell Activities of Daily Living Scale to the International Classification of Functioning, Disability and Health	2013	Pubmed
Dallmeijer	Lipid, lipoprotein, and apolipoprotein profiles in active and sedentary men with tetraplegia	1997	Pubmed
Levack	Listen to the patient: quality of life of patients with recently diagnosed malignant cord compression in relation to their disability	2004	Pubmed
Frieden	Listening for footsteps	2002	Pubmed
Boothe	Living a full life with a spinal cord injury	2000	Pubmed
Sprigle	Load redistribution in variable position wheelchairs in people with spinal cord injury	2010	Pubmed
Casanova	Locked-in syndrome: improvement in the prognosis after an early intensive multidisciplinary rehabilitation	2003	Pubmed
Kiwerski	Locomotive capacity of patients with spinal cord injuries in the thoraco-lumbar segment	1985	Pubmed
Behrman	Locomotor training progression and outcomes after incomplete spinal cord injury	2005	Pubmed
Amsters	Long duration spinal cord injury: perceptions of functional change over time	2005	Pubmed
Zahavi	Long term effect (more than five years) of intrathecal baclofen on impairment, disability, and quality of life in patients with severe spasticity of spinal origin	2004	Pubmed
Charlifue	Longitudinal outcomes in spinal cord injury: aging, secondary conditions, and well-being.	1999	Pubmed
Hiremath	Longitudinal Prediction of Quality-of-Life Scores and Locomotion in Individuals With Traumatic Spinal Cord Injury	2017	Pubmed
van Koppenhagen	Longitudinal relationship between wheelchair exercise capacity and life satisfaction in patients with spinal cord injury: A cohort study in the Netherlands	2014	Pubmed
Fekete	Longitudinal study of social participation and well-being among persons with spinal cord injury and their partners (pro-WELL)	2017	Pubmed
Halstead	Longitudinal unobtrusive measurements in rehabilitation.	1976	Pubmed
Jaspers Focks-Feenstra	Long-term patient satisfaction after reconstructive upper extremity surgery to improve arm-hand function in tetraplegia	2011	Pubmed
Boschen	Long-term adjustment and community reintegration following spinal cord injury.	2003	Pubmed
Hicks	Long-term body-weight-supported treadmill training and subsequent follow-up in persons with chronic SCI: effects on functional walking ability and measures of subjective well-being	2005	Pubmed
Li	Long-term care services needs for spinal-cord injury patients in Taiwan	2001	Pubmed
Poretti	Long-term complications and quality of life in children with intraspinal tumors	2008	Pubmed
Noreau	Long-term consequences of spinal cord injury on social participation: the occurrence of handicap situations.	2000	Pubmed
Padula	Long-term effects of an intensive interventional training program based on activities for individuals with spinal cord injury: a pilot study	2015	Pubmed
Tasdemiroglu	Long-term follow-up results of thoracolumbar fractures after posterior instrumentation	1995	Pubmed
Dudley	Long-term functional benefits of selective dorsal rhizotomy for spastic cerebral palsy	2013	Pubmed
Vogel	Long-term outcomes and life satisfaction of adults who had pediatric spinal cord injuries	1998	Pubmed
Hwang	Long-Term Outcomes and Longitudinal Changes of Neurogenic Bowel Management in Adults With Pediatric-Onset Spinal Cord Injury	2017	Pubmed
Vogel	Long-term outcomes of adults with pediatric-onset spinal cord injuries as a function of neurological impairment	2011	Pubmed
Bozzacco	Long-term psychosocial effects of spinal cord injury.	1993	Pubmed
Batten	Long-term rehab. Improving quality of life	1999	Pubmed
Matsuyama	Long-term results of occipitothoracic fusion surgery in RA patients with destruction of the cervical spine	2005	Pubmed
Park	Long-term results of spinal cord injury therapy using mesenchymal stem cells derived from bone marrow in humans	2012	Pubmed
Gerhart	Long-term spinal cord injury: functional changes over time.	1993	Pubmed
Strauss	Long-term survival of children and adolescents after traumatic brain injury	1998	Pubmed
Agarwal	Long-term user perceptions of an implanted neuroprosthesis for exercise, standing, and transfers after spinal cord injury	2003	Pubmed
Schmeisser	Low cost assistive device systems for a high spinal-cord-injured person in the home environment--a technical note	1979	Pubmed
Barbonetti	Lower Vitamin D Levels Are Associated With Depression in People With Chronic Spinal Cord Injury	2017	Pubmed
Merli	Low-molecular-weight heparins versus unfractionated heparin in the treatment of deep vein thrombosis and pulmonary embolism	2000	Pubmed
Iwakiri	Lumbosacral reconstruction for intractable pyogenic spondylitis using a total leg flap with a vascularized tibia graft	2008	Pubmed
Mildenberger	Magnetic splint for object retrieval	1984	Pubmed
Christen	Maintaining hard won independence as long as possible	2015	Pubmed
Sgouros	Management and outcome of posttraumatic syringomyelia	1996	Pubmed
Cobb	Management of a paraplegic patient with a full thickness ischial pressure ulcer	2002	Pubmed
Ganguly	Management of chronic myelopathy symptoms and activities of daily living	2012	Pubmed
Coggrave	Management of neurogenic bowel dysfunction in the community after spinal cord injury: a postal survey in the United Kingdom	2009	Pubmed
Richardson	Management of spasticity in hereditary spastic paraplegia	1999	Pubmed
Grosse	Management of the spinal cord injured patient--hospital routine or principles of comprehensive rehabilitation?].	1992	Pubmed
Sherman	Management of traumatic optic neuropathy with coexistent spinal cord injury: a case report	1997	Pubmed
Wirtz	Managing chronic spinal cord injury: issues in critical care.	1996	Pubmed
Grant	Managing the disabled at home	1972	Pubmed
Dudgeon	Managing usual and unexpected pain with physical disability: a qualitative analysis	2006	Pubmed
Schopp	Masculine role variables and outcomes among men with spinal cord injury.	2007	Pubmed
Starck	Maslow's needs and the spinal cord injured client	1980	Pubmed
Hosack	Maximizing independent function	2010	Pubmed
Nilsson	Meanings of balance for people with long-term illnesses	2016	Pubmed
Packham	Measurement properties of painDETECT: Rasch analysis of responses from community-dwelling adults with neuropathic pain	2017	Pubmed
Chang	Measurement of motor conduction in the thoracolumbar cord. A possible predictor of surgical outcome in cervical spondylotic myelopathy	1996	Pubmed
Chang	Measurement properties of a modified measure of participation for persons with spinal cord injury	2016	Pubmed
Post	Measurement properties of the short version of the Van Lieshout test for arm/hand function of persons with tetraplegia after spinal cord injury	2006	Pubmed
Heinemann	Measurement properties of the Spinal Cord Injury-Functional Index (SCI-FI) short forms.	2014	Pubmed
Azaula	Measuring functional status and family support in older school-aged children with cerebral palsy: comparison of three instruments	2000	Pubmed
Hahn	Measuring Access to Information and Technology: Environmental Factors Affecting Persons With Neurologic Disorders	2016	Pubmed
Slavin	Measuring activity limitation outcomes in youth with spinal cord injury	2016	Pubmed
Dean	Measuring appraisals following acquired spinal cord injury: a preliminary psychometric analysis of the appraisals of disability	2009	Pubmed
Spooren	Measuring change in arm hand skilled performance in persons with a cervical spinal cord injury: responsiveness of the Van Lieshout Test	2006	Pubmed
Heinemann	Measuring enfranchisement: importance of and control over participation by people with disabilities	2013	Pubmed
Heinemann	Measuring participation enfranchisement	2011	Pubmed
Bonniaud	Measuring quality of life in multiple sclerosis patients with urinary disorders using the Qualiveen questionnaire	2004	Pubmed
May	Measuring quality of life of persons with spinal cord injury: external and structural validity	2002	Pubmed
Van Drongelen	Mechanical load on the upper extremity during wheelchair activities	2005	Pubmed
Markenson	Mechanisms of chronic pain	1996	Pubmed
Huang	Mediating effects of social support and self-concept on depressive symptoms in adults with spinal cord injury	2015	Pubmed
Huang	Mediating effects of social support and self-concept on depressive symptoms in adults with spinal cord injury	2015	Pubmed
Willot	Medical monitoring and the daily life of paraplegic patients	1988	Pubmed
Fiorilli	Mental health and social participation skills of wheelchair basketball players: a controlled study	2013	Pubmed
Samy	Mental health forum 10. Making the most of his days.	1983	Pubmed
Bracken	Methylprednisolone or tirilazad mesylate administration after acute spinal cord injury: 1-year follow up. Results of the third National Acute Spinal Cord Injury randomized controlled trial	1998	Pubmed
Prodinger	Metric properties of the Spinal Cord Independence Measure - Self Report in a community survey	2016	Pubmed
Marino	Metric properties of the ASIA motor score: subscales improve correlation with functional activities	2004	Pubmed
Spaić	Microsurgical DREZotomy for pain of spinal cord and Cauda equina injury origin: clinical characteristics of pain and implications for surgery in a series of 26 patients	2002	Pubmed
Sasai	Microsurgical posterior herniotomy with en bloc laminoplasty: alternative method for treating cervical disc herniation	2005	Pubmed
Vaidyanathan	Midodrine: insidious development of urologic adverse effects in patients with spinal cord injury: a report of 2 cases	2007	Pubmed
van Hedel	Mismatch between investigator-determined and patient-reported independence after spinal cord injury: consequences for rehabilitation and trials.	2011	Pubmed
Atkins	Mobile arm supports: evidence-based benefits and criteria for use	2008	Pubmed
Biering-Sørensen	Mobility aids and transport possibilities 10-45 years after spinal cord injury	2004	Pubmed
Heinemann	Mobility for persons with spinal cord injury: an evaluation of two systems	1987	Pubmed
Molton	Modeling secondary health conditions in adults aging with physical disability	2014	Pubmed
Hattori	Modular megaprosthesis in metastatic bone disease of the femur	2011	Pubmed
Reichenfelser	Monitoring of spasticity and functional ability in individuals with incomplete spinal cord injury with a functional electrical stimulation cycling system	2012	Pubmed
Gulati	Morquio syndrome: a rehabilitation perspective	1996	Pubmed
Krause	Mortality after spinal cord injury: an 11-year prospective study	1997	Pubmed
Fliess-Douer	Most essential wheeled mobility skills for daily life: an international survey among Paralympic wheelchair athletes with spinal cord injury	2012	Pubmed
Westgren	Motherhood after traumatic spinal cord injury	1994	Pubmed
Alexander	Mothers with spinal cord injuries: impact on marital, family, and children's adjustment	2002	Pubmed
Brillhart	Motivation and the coping process of adults with disabilities: a qualitative study.	1997	Pubmed
Sasanuma	Motor and cognitive function analysis for home discharge using the Functional Independence Measure in patients undergoing cardiac rehabilitation at a long-term acute-care hospital	2015	Pubmed
Fattal	Motor capacities of upper limbs in tetraplegics: a new scale for the assessment of the results of functional surgery on upper limbs	2004	Pubmed
Hirschfeld	Motor control of every day motor tasks: guidance for neurological rehabilitation	2007	Pubmed
Dickstein	Motor imagery in physical therapist practice	2007	Pubmed
Wichers	Motor impairments and activity limitations in children with spastic cerebral palsy: a Dutch population-based study	2009	Pubmed
van Hedel	Motor recovery after spinal cord injury: assessments, factors and mechanisms	2010	Pubmed
Allen	Motor scores on the functional independence measure after pediatric spinal cord injury	2009	Pubmed
Müslümanoğlu	Motor, sensory and functional recovery in patients with spinal cord lesions.	1997	Pubmed
Zbogar	Movement repetitions in physical and occupational therapy during spinal cord injury rehabilitation	2017	Pubmed
Pollack	Moving Out Services for Education and Support (MOSES): a model program for individuals with spinal cord injury	1992	Pubmed
Hahn	Multidimensional health risk appraisal among adults aging with acquired disabilities	2013	Pubmed
Quan	Multidisciplinary treatment and survival of patients with vertebral metastases from thyroid carcinoma	2012	Pubmed
van der Sluis	Multiple injuries: an overview of the outcome	1995	Pubmed
Drolet	Muscle strength changes as measured by dynamometry following functional rehabilitation in individuals with spinal cord injury	1999	Pubmed
Sloan	Musculoskeletal effects of an electrical stimulation induced cycling programme in the spinal injured	1994	Pubmed
Hincapie	Musculoskeletal model-guided, customizable selection of shoulder and elbow muscles for a C5 SCI neuroprosthesis	2008	Pubmed
Joubert	My suprapubic catheter	2002	Pubmed
Florio	Need and use of assistive devices for personal mobility by individuals with spinal cord injury	2016	Pubmed
Elliott	Negotiating reality after physical loss: hope, depression, and disability	1991	Pubmed
McKinley	Neoplastic versus traumatic spinal cord injury: an outcome comparison after inpatient rehabilitation	1999	Pubmed
McKinley	Neoplastic vs. traumatic spinal cord injury: an inpatient rehabilitation comparison.	2000	Pubmed
Wu	Nerve repair using acidic fibroblast growth factor in human cervical spinal cord injury: a preliminary Phase I clinical study	2008	Pubmed
Fox	Nerve Transfers in Tetraplegia.	2016	Pubmed
Strobl	Neurogenic spinal deformities. II. Sitting and seating devices: principles and indications	2002	Pubmed
Beckung	Neuroimpairments, activity limitations, and participation restrictions in children with cerebral palsy	2002	Pubmed
Schenker	Neuroimpairments, activity performance, and participation in children with cerebral palsy mainstreamed in elementary schools	2005	Pubmed
Riaz	Neurologic compression by thoracic disc in a case of scheuermann kyphosis - an infrequent combination	2005	Pubmed
Manghi	Neurologic diseases, mental retardation and reduction in work capacity	1985	Pubmed
Munin	Neurologic recovery and functional improvement after vecuronium-induced quadriparesis	1995	Pubmed
Aito	Neurological and functional outcome in traumatic central cord syndrome	2007	Pubmed
Bracken	Neurological and functional status 1 year after acute spinal cord injury: estimates of functional recovery in National Acute Spinal Cord Injury Study II from results modeled in National Acute Spinal Cord Injury Study III	2002	Pubmed
Hundsberger	Neurological complications in cancer patients	2014	Pubmed
Fujimura	Neurological evaluation after radical resection of sacral neoplasms	1994	Pubmed
Middleton	Neurological level effect on the discharge functional status of spinal cord injured persons after rehabilitation	1998	Pubmed
Hillman	Neurological worsening due to infection from renal stones in a multiple sclerosis patient	2000	Pubmed
Doucet	Neuromuscular electrical stimulation for skeletal muscle function	2012	Pubmed
Allam	Neuromuscular scoliosis	2013	Pubmed
Popovic	Neuroprostheses for grasping	2002	Pubmed
Keith	Neuroprostheses for the upper extremity	2001	Pubmed
Rupp	Neuroprosthetics of the upper extremity—clinical application in spinal cord injury and future perspectives	2004	Pubmed
Xiong	Neuroprotection of erythropoietin and methylprednisolone against spinal cord ischemia-reperfusion injury	2011	Pubmed
Gear	New assistive technology for passive standing	1999	Pubmed
Lobo-Prat	New biomechanical model for clinical evaluation of the upper extremity motion in subjects with neurological disorders: an application case	2014	Pubmed
Stepanov	New conceptions in complex management of spine trauma patients including reconstructive microsurgery and succeeding rehabilitation	2008	Pubmed
Beekhuizen	New perspectives on improving upper extremity function after spinal cord injury	2005	Pubmed
Jorge	New rehabilitation models for neurologic inpatients in Brazil	2015	Pubmed
Raithatha	Non-invasive brain stimulation and robot-assisted gait training after incomplete spinal cord injury: A randomized pilot study	2016	Pubmed
Aidinoff	Non-linear formulas for the spinal cord injury ability realization measurement index	2012	Pubmed
Parry	Non-traumatic paraplegia [correction of paraplegis] in a Zimbabwean population--a retrospective survey	1999	Pubmed
McKinley	Nontraumatic vs. traumatic spinal cord injury: a rehabilitation outcome comparison	2001	Pubmed
Augoustides	Novel approaches to spinal cord protection during thoracoabdominal aortic interventions	2014	Pubmed
De los Reyes-Guzmán	Novel kinematic indices for quantifying movement agility and smoothness after cervical Spinal Cord Injury	2016	Pubmed
McCullumsmith	Novel risk factors associated with current suicidal ideation and lifetime suicide attempts in individuals with spinal cord injury	2015	Pubmed
Brogioli	Novel Sensor Technology To Assess Independence and Limb-Use Laterality in Cervical Spinal Cord Injury	2016	Pubmed
Schoening	Numerical scoring of self-care status: a study of the Kenny self-care evaluation	1968	Pubmed
Yagihashi	Nurse questionnaire survey about the urethral catheterization and clinical analysis of iatrogenic urethral injury	2014	Pubmed
Yagihashi	Nurse questionnaire survey about the urethral catheterization and clinical analysis of iatrogenic urethral injury	2014	Pubmed
Peters	Nursing care study - living with paraplegia: day by day	1982	Pubmed
Kristel	Nursing in quadriplegia. 1. Rehabilitation is a basic task of care	1998	Pubmed
Kida	Nursing of a patient with a central cervical cord injury	1983	Pubmed
Tanaka	Nursing of patients with cervical and other spinal cord injuries for independent urination actions: description of the nursing processes	1985	Pubmed
Yoshida	Nursing of patients with cervical cord injuries in a rehabilitation ward	1983	Pubmed
Yoon	Nursing study on rehabilitation of spinal cord injury client at home	1992	Pubmed
Wilson	Objective assessment of mobility of the spinal cord injured in a free-living environment	2008	Pubmed
Liang	Objective measures of neighborhood environment and self-reported physical activity in spinal cord injured men	2008	Pubmed
Okada	Observations in the diagnosis of cervical myelopathy in patients suffering from diabetes mellitus	2012	Pubmed
Gorzkowski	Obstacles to community participation among youth with spinal cord injury	2011	Pubmed
Mingaila	Occupational therapy for patients with spinal cord injury in early rehabilitation	2005	Pubmed
Mingaila	Occupational therapy in spinal cord injury	2004	Pubmed
Sargant	Occupational therapy management of the acute spinal cord-injured patient.	1986	Pubmed
Sosner	Odontoid fracture and C1-C2 subluxation in psoriatic cervical spondyloarthropathy. A case report	1996	Pubmed
Kadefors	On the feasibility of myo-electric control of multifunctional orthoses	1973	Pubmed
Scivoletto	One year follow up of spinal cord injury patients using a reciprocating gait orthosis: preliminary report	2000	Pubmed
House	One-stage key pinch and release with thumb carpal-metacarpal fusion in tetraplegia	1992	Pubmed
Kikuike	One-staged combined cervical and lumbar decompression for patients with tandem spinal stenosis on cervical and lumbar spine: analyses of clinical outcomes with minimum 3 years follow-up	2009	Pubmed
Chan	One-year follow-up of Chinese people with spinal cord injury: a preliminary study	2013	Pubmed
Shimada	Open heart surgery in a paraplegic patient	2004	Pubmed
McCunniff	Operative Versus Nonoperative Management of Civilian Gunshot Wounds to the Spinal Cord: Novel Use of the Functional Independence Measure for Validated Outcomes	2017	Pubmed
Zrubecky	Orthoses for restoration of prehensile function in tetraplegics	1972	Pubmed
DiPasquale-Lehnerz	Orthotic intervention for development of hand function with C-6 quadriplegia	1994	Pubmed
Wirz	Outcome after incomplete spinal cord injury: central cord versus Brown-Sequard syndrome.	2010	Pubmed
Ardolino	Outcome measurements in major trauma--results of a consensus meeting	2012	Pubmed
Ditunno	Outcome measures: evolution in clinical trials of neurological/functional recovery in spinal cord injury	2010	Pubmed
Davis	Outcome of functional electrical stimulation in the rehabilitation of a child with C-5 tetraplegia	1999	Pubmed
Spooren	Outcome of motor training programmes on arm and hand functioning in patients with cervical spinal cord injury according to different levels of the ICF: a systematic review	2009	Pubmed
Sampath	Outcome of patients treated for cervical myelopathy. A prospective, multicenter study with independent clinical review	2000	Pubmed
Luksanapruksa	Outcomes and effectiveness of posterior occipitocervical fusion for suboccipital spinal metastases	2017	Pubmed
Consortium for Spinal Cord Medicine	Outcomes following traumatic spinal cord injury: clinical practice guidelines for health-care professionals.	2000	Pubmed
McKinley	Outcomes of early surgical management versus late or no surgical intervention after acute spinal cord injury	2004	Pubmed
Lucke	Outcomes of nurse caring as perceived by individuals with spinal cord injury during rehabilitation	1999	Pubmed
Hammond	Outcomes of social work and case management services during inpatient spinal cord injury rehabilitation: the SCIRehab project	2012	Pubmed
Matsuda	Outcomes of surgical treatment for cervical myelopathy in patients more than 75 years of age	1999	Pubmed
Mulcahey	Outcomes of tendon transfer surgery and occupational therapy in a child with tetraplegia secondary to spinal cord injury	1995	Pubmed
Davis	Outcomes of upper-extremity tendon transfers and functional electrical stimulation in an adolescent with C-5 tetraplegia.	1997	Pubmed
Shirado	Outdoor winter activities of spinal cord-injured patients. With special reference to outdoor mobility	1995	Pubmed
Lugo	Out-patient rehabilitation programme for spinal cord injured patients: evaluation of the results on motor FIM score	2007	Pubmed
Anderson	Overview of adult outcomes in pediatric-onset spinal cord injuries: implications for transition to adulthood	2004	Pubmed
Kratz	Pain Acceptance Decouples the Momentary Associations Between Pain, Pain Interference, and Physical Activity in the Daily Lives of People With Chronic Pain and Spinal Cord Injury	2017	Pubmed
Barrett	Pain characteristics in patients admitted to hospital with complications after spinal cord injury	2003	Pubmed
Donnelly	Pain following spinal cord injury: the impact on community reintegration	2005	Pubmed
Nepomuceno	Pain in patients with spinal cord injury	1979	Pubmed
Ullrich	Pain intensity, pain interference and characteristics of spinal cord injury.	2008	Pubmed
Hanley	Pain interference in persons with spinal cord injury: classification of mild, moderate, and severe pain	2006	Pubmed
Miró	Pain location and functioning in persons with spinal cord injury	2014	Pubmed
Marcondes	Pain severity and mobility one year after spinal cord injury: a multicenter, cross-sectional study	2016	Pubmed
Kunju	palmar pressure sensor for measurement of upper limb weight bearing by the hands during transfers by paraplegics	2013	Pubmed
Sakaura	Paraparesis due to exacerbation of preexisting spinal pseudoarthrosis following infliximab therapy for advanced ankylosing spondylitis	2006	Pubmed
Hancock	Paraplegia	1998	Pubmed
Huitt	Paraplegia ambulatory training using Craig-Scott orthoses	1978	Pubmed
Rodríguez Luna	Paraplegia due to adhesive arachnoiditis. A case report	2009	Pubmed
Lamid	Paraplegia due to adrenomyeloneuropathy	1984	Pubmed
Rosman	Paraplegic use of walking braces: a survey	1974	Pubmed
Mechanick	Parathyroid hormone suppression in spinal cord injury patients is associated with the degree of neurologic impairment and not the level of injury	1997	Pubmed
Sullivan	Part I: preventing injury and promoting rehabilitation. Specialized care of the spinal cord injured patient	1976	Pubmed
Noreau	Participation after spinal cord injury: the evolution of conceptualization and measurement	2005	Pubmed
Majnemer	Participation and enjoyment of leisure activities in school-aged children with cerebral palsy	2008	Pubmed
Ruoranen	Participation and integration from the perspective of persons with spinal cord injury from five European countries	2015	Pubmed
Kelly	Participation and quality of life among youth with spinal cord injury	2012	Pubmed
Magasi	Participation following traumatic spinal cord injury: an evidence-based review for research	2008	Pubmed
Lundström	Participation in activities and secondary health complications among persons aging with traumatic spinal cord injury	2017	Pubmed
Gray	Participation survey/mobility: psychometric properties of a measure of participation for people with mobility impairments and limitations	2006	Pubmed
Kreuter	Partner relationships, functioning, mood and global quality of life in persons with spinal cord injury and traumatic brain injury	1998	Pubmed
Norris-Baker	Patient behavior as a predictor of outcomes in spinal cord injury	1981	Pubmed
Nelson	Patient evaluation of prone carts used in spinal cord injury	1996	Pubmed
Gunnarsson	Patient experiences with intrathecal baclofen as a treatment for spasticity - a pilot study	2015	Pubmed
Iwakura	Patient monitoring in the hospital rehabilitation department	1984	Pubmed
Carter	Patient planning in a spinal cord centre using a computer	1972	Pubmed
Byrnes	Patient-focused goal planning process and outcome after spinal cord injury rehabilitation: quantitative and qualitative audit	2012	Pubmed
Adelved	Patient-reported health minimum 8 years after operatively treated displaced sacral fractures: a prospective cohort study	2014	Pubmed
Eva	Patients' constructions of disability in metastatic spinal cord compression	2009	Pubmed
Zaoui	Patients with complicated Pott's disease: management in a rehabilitation department and functional prognosis	2012	Pubmed
Bartz	Patients with severe disabilities: assistence is the key to independent living	2003	Pubmed
Taylor	Pattern of use and user satisfaction of Neuro Control Freehand system	2001	Pubmed
Taylor	Patterns in Wheeled Mobility Skills Training, Equipment Evaluation, and Utilization: Findings from the SCIRehab Project. Assist Technol	2015	Pubmed
Norweg	Patterns, predictors, and associated benefits of driving a modified vehicle after spinal cord injury: findings from the National Spinal Cord Injury Model Systems	2011	Pubmed
Murphy	Pediatric rehabilitation: 2. Environmental factors affecting participation	2010	Pubmed
Kim	Pediatric rehabilitation: 5. Transitioning teens with disabilities into adulthood.	2010	Pubmed
Paleg	Pediatric seating and support	2006	Pubmed
Crawford	People with mobility impairments: Physical activity and quality of participation	2008	Pubmed
Borges	People with spinal cord injury and the different perceptions about their condition	2012	Pubmed
Price	Perceived causes of change in function and quality of life for people with long duration spinal cord injury	2004	Pubmed
Reinhardt	Perceived impact of environmental barriers on participation among people living with spinal cord injury in Switzerland	2016	Pubmed
Gontkovsky	Perceived information needs of community-dwelling persons with chronic spinal cord injury: findings of a survey and impact of race	2007	Pubmed
Bryden	Perceived outcomes and utilization of upper extremity surgical reconstruction in individuals with tetraplegia at model spinal cord injury systems.	2004	Pubmed
Fleuren	Perception of lower limb spasticity in patients with spinal cord injury	2009	Pubmed
Bell	Perception of the impact of assistive devices on daily life of three individuals with quadriplegia.	1995	Pubmed
Larsson Lund	Perceptions of participation and predictors of perceived problems with participation in persons with spinal cord injury	2005	Pubmed
Cesar	Perceptions of environmental safety among individuals with spinal cord injury	2002	Pubmed
Lannem	Perceptions of exercise mastery in persons with complete and incomplete spinal cord injury	2010	Pubmed
Kushchayev	Percutaneous vertebroplasty for thyroid cancer metastases to the spine	2010	Pubmed
Andresen	Performance of health-related quality-of-life instruments in a spinal cord injured population	1999	Pubmed
Wangdell	Performance of prioritized activities is not correlated with functional factors after grip reconstruction in tetraplegia	2011	Pubmed
Rowell	Personal assistance, income and employment: the spinal injuries survey instrument (SISI) and its application in a sample of people with quadriplegia.	2008	Pubmed
Rowell	Personal assistance, income and employment: the spinal injuries survey instrument (SISI) and its application in a sample of people with quadriplegia.	2008	Pubmed
Nosek	Personal assistance: its effect on the long-term health of a rehabilitation hospital population	1993	Pubmed
Alon	Persons with C5 or C6 tetraplegia achieve selected functional gains using a neuroprosthesis.	2003	Pubmed
Taricco	Pharmacological interventions for spasticity following spinal cord injury	2000	Pubmed
Taricco	Pharmacological interventions for spasticity following spinal cord injury: results of a Cochrane systematic review	2006	Pubmed
Awad	Phenol block for control of hip flexor and adductor spasticity	1972	Pubmed
Burns	Phenomenological study of neurogenic bowel from the perspective of individuals living with spinal cord injury	2015	Pubmed
Burns	Phenomenological study of neurogenic bowel from the perspective of individualsliving with spinal cord injury	2015	Pubmed
Martin Ginis	Physical activity and subjective well-being among people with spinal cord injury: a meta-analysis	2010	Pubmed
Tawashy	Physical activity is related to lower levels of pain, fatigue and depression in individuals with spinal-cord injury: a correlational study	2009	Pubmed
Buchholz	Physical activity levels are low in free-living adults with chronic paraplegia	2003	Pubmed
Morris	Physical activity recommendations for children and adolescents with chronic disease	2008	Pubmed
Kawanishi	Physical activity, quality of life, and functional autonomy of adults with spinal cord injuries	2013	Pubmed
Nakajima	Physical and social condition of rehabilitated spinal cord injury patients in Japan: a long-term review	1988	Pubmed
Dallmeijer	Physical capacity and physical strain in persons with tetraplegia; the role of sport activity	1996	Pubmed
Murphy	Physical disability and social liminality: a study in the rituals of adversity.	1988	Pubmed
Dudgeon	Physical disability and the experience of chronic pain	2002	Pubmed
Hjeltnes	Physical endurance capacity, functional status and medical complications in spinal cord injured subjects with long-standing lesions	1990	Pubmed
Marin	Physical medicine and rehabilitation in the military: the Bosnian mass casualty experience	2001	Pubmed
Dallmeijer	Physical performance during rehabilitation in persons with spinal cord injuries	1999	Pubmed
Dallmeijer	Physical performance in persons with spinal cord injuries after discharge from rehabilitation.	1999	Pubmed
Yoshihara	Physical rehabilitation and nursing of patients with cervical cord injuries and severe paralysis of the shoulder and arms	1983	Pubmed
Trigiano	Physical rehabilitation of quadriplegic patients	1970	Pubmed
Janssen	Physical strain in daily life of wheelchair users with spinal cord injuries.	1994	Pubmed
Chu	Physical therapists' ability to predict future mobility after spinal cord injury.	2012	Pubmed
Gilgoff	Planning an outing from hospital for ventilator-dependent children	1992	Pubmed
Wu	Plasma Tumor Necrosis Factor-alpha (TNF-α) Levels Correlate with Disease Severity in Spastic Diplegia, Triplegia, and Quadriplegia in Children with Cerebral Palsy	2015	Pubmed
Silber	Pneumatic orthosis PILOT STUDY	1975	Pubmed
Miller	Pneumobelt use among high quadriplegic population	1988	Pubmed
Schellinger	Poliomyelitic-like illness in central European encephalitis	2000	Pubmed
Schmidt	Polyneuropathy as a sole syndrome in malignant thymoma	2003	Pubmed
Rogers	Portrait of an active tetraplegic	1983	Pubmed
Yoshimura	Possibility of independence in ADL (Activities of Daily Living) for patients with cervical spinal cord injuries--an evaluation based on the Zancolli Classification of Residual Arm Functions	1998	Pubmed
Cizmar	Possible restorations of the upper extremity motion in tetraplegic patients - 5-year clinical experience	2006	Pubmed
Sapountzi-Krepia	Post traumatic paraplegics living in Athens: the impact of pressure sores and UTIs on everyday life activities.	1998	Pubmed
Bloemen-Vrencken	Post-discharge nursing problems of spinal cord injured patients: on which fields can nurses contribute to rehabilitation?	2003	Pubmed
Bonds	Posterior deltoid-to-triceps tendon transfer to restore active elbow extension in patients with tetraplegia	2009	Pubmed
Nielsen	Post-traumatic syringomyelia	2003	Pubmed
Goldstein	Posttraumatic syringomyelia: profound neuronal loss, yet preserved function.	1998	Pubmed
Anton	Posttraumatic syringomyelia: the British Columbia experience	1986	Pubmed
Middleton	Postural control during stance in paraplegia: effects of medially linked versus unlinked knee-ankle-foot orthoses	1999	Pubmed
Schüssler-Fiorenza Rose	Potentially Avoidable Hospitalizations among People at Different Activity of Daily Living Limitation Stages	2017	Pubmed
Bottos	Powered wheelchairs and independence in young children with tetraplegia	2001	Pubmed
Atanasov	Practical guidelines for the management of closed spinal cord injuries	1997	Pubmed
Nunn	Practical issues affecting the measurement and analysis of physiological data recorded remotely from individuals with spinal cord injury (SCI) during normal daily activities	2006	Pubmed
Aass	Pre- and post-treatment daily life function in patients with hormone resistant prostate carcinoma treated with radiotherapy for spinal cord compression	2005	Pubmed
Whiteneck	Predicting community reintegration after spinal cord injury from demographic and injury characteristics	1999	Pubmed
Whiteneck	Predicting community reintegration after spinal cord injury from demographic and injury characteristics.	1999	Pubmed
Tate	Predicting depression and psychological distress in persons with spinal cord injury based on indicators of handicap	1994	Pubmed
Murphy	Predicting employment status at 2 years' postdischarge from spinal cord injury rehabilitation	2011	Pubmed
Tonack	Predicting life satisfaction after spinal cord injury in a Canadian sample	2008	Pubmed
MacKenzie	Predicting posttrauma functional disability for individuals without severe brain injury	1986	Pubmed
Erosa	Predicting quality of life 5 years after medical discharge for traumatic spinal cord injury	2014	Pubmed
DeVivo	Predicting unplanned hospitalizations in persons with spinal cord injury	1994	Pubmed
Ivie	Predicting unplanned hospitalizations in persons with spinal cord injury.	1994	Pubmed
Velstra	Prediction and stratification of upper limb function and self-care in acute cervical spinal cord injury with the graded redefined assessment of strength, sensibility, and prehension (GRASSP)	2014	Pubmed
Murphy	Prediction of employment status one year post-discharge from rehabilitation following traumatic spinal cord injury: an exploratory analysis of participation and environmental variables	2009	Pubmed
Schönherr	Prediction of functional outcome after spinal cord injury: a task for the rehabilitation team and the patient.	2000	Pubmed
Lazar	Prediction of functional outcome by motor capability after spinal cord injury	1989	Pubmed
Velstra	Predictive Value of Upper Limb Muscles and Grasp Patterns on Functional Outcome in Cervical Spinal Cord Injury	2016	Pubmed
Abdul-Sattar	Predictors of functional outcome in patients with traumatic spinal cord injury after inpatient rehabilitation: in Saudi Arabia.	2014	Pubmed
Meyers	Predictors of medical care utilization by independently living adults with spinal cord injuries	1989	Pubmed
Meyers	Predictors of medical care utilization by independently living adults with spinal cord injuries.	1989	Pubmed
Aarabi	Predictors of outcome in acute traumatic central cord syndrome due to spinal stenosis	2011	Pubmed
Weitzenkamp	Predictors of personal care assistance for people with spinal cord injury	2002	Pubmed
Epstein	Predictors of rehabilitation outcome among patients with SCI	1989	Pubmed
Creighton	Pregnancy and quadriplegia: an occupational therapy home program	1989	Pubmed
Fisher	Preliminary evaluation of a neural prosthesis for standing after spinal cord injury with four contact nerve-cuff electrodes for quadriceps stimulation	2006	Pubmed
Kalpakjian	Preliminary reliability and validity of a Spinal Cord Injury Secondary Conditions Scale	2007	Pubmed
Nyland	Preserving transfer independence among individuals with spinal cord injury	2000	Pubmed
Finnegan	Pressure sores. 1. Positive living or negative existence?	1983	Pubmed
Garber	Pressure ulcer risk in spinal cord injury: predictors of ulcer status over 3 years	2000	Pubmed
Fuhrer	Pressure ulcers in community-resident persons with spinal cord injury: prevalence and risk factors	1993	Pubmed
Holtz	Prevalence and Effect of Problematic Spasticity After Traumatic Spinal Cord Injury.	2017	Pubmed
Subbarao	Prevalence and impact of wrist and shoulder pain in patients with spinal cord injury.	1995	Pubmed
Pellegrini	Prevalence of shoulder discomfort in paraplegic subjects	2012	Pubmed
Breitung	Preventive psychology - theory and practical application on the example of paraplegic patients (author's transl)	1982	Pubmed
Lee	Primary intradural extramedullary melanoma of the cervical spinal cord: case report	2010	Pubmed
Döderlein	Principles of orthopedic treatment of flaccid paralysis	2014	Pubmed
Piatt	Problematic secondary health conditions among adults with spinal cord injury and its impact on social participation and daily life	2016	Pubmed
Hicks	Problems in writing injury assessment reports. Part III: Spinal injury and paraplegia: the third of a series.	1988	Pubmed
Hooker	Problems of veterans spinal cord injured after age 55: nursing implications	1986	Pubmed
Curt	Prognosis of traumatic spinal cord lesions. Significance of clinical and electrophysiological findings	1997	Pubmed
Rades	Prognostic factors and a survival score for patients with metastatic spinal cord compression from colorectal cancer	2012	Pubmed
Rades	Prognostic factors in a series of 504 breast cancer patients with metastatic spinal cord compression	2012	Pubmed
Tang	Prognostic indicators in metastatic spinal cord compression: using functional independence measure and Tokuhashi scale to optimize rehabilitation planning	2007	Pubmed
Thometz	Progression of scoliosis after skeletal maturity in institutionalized adults who have cerebral palsy	1988	Pubmed
Merenda	Progressive treatment options for children with spinal cord injury	2000	Pubmed
Lancioni	Promoting ambulation and object manipulation in persons with multiple handicaps through the use of a robot	1994	Pubmed
Bodzioch	Promoting independence in adolescent paraplegics: a 2-week "camping" experience	1986	Pubmed
Coulet	Pronating osteotomy of the radius for forearm supination contracture in high-level tetraplegic patients: technique and results		Pubmed
Mulcahey	Prospective evaluation of biceps to triceps and deltoid to triceps for elbow extension in tetraplegia	2003	Pubmed
Kishi	Prospective longitudinal study of depression following spinal cord injury	1994	Pubmed
Dudgeon	Prospective measurement of functional changes after selective dorsal rhizotomy	1994	Pubmed
Duffill	Prospective study of omental transposition in patients with chronic spinal injury	2001	Pubmed
Herman	Prosthetic fitting and ambulation in a paraplegic patient with an above-knee amputation	1995	Pubmed
Ackerly	Proximal femoral resection for subluxation or dislocation of the hip in spastic quadriplegia	2003	Pubmed
Andresen	Proxy reliability: health-related quality of life (HRQoL) measures for people with disability	2001	Pubmed
Judd	Psychiatric consultation in a spinal injuries unit	1992	Pubmed
Howard	Psychological aftereffects of halo traction	1982	Pubmed
Kennedy	Psychological contributions to functional independence: a longitudinal investigation of spinal cord injury rehabilitation	2011	Pubmed
Gajraj-Singh	Psychological impact and the burden of caregiving for persons with spinal cord injury (SCI) living in the community in Fiji	2011	Pubmed
Kennedy	Psychological impact of the management of methicillin-resistant Staphylococcus aureus (MRSA) in patients with spinal cord injury	1997	Pubmed
deRoon-Cassini	Psychological well-being after spinal cord injury: perception of loss and meaning making	2009	Pubmed
Soler	Psychometric evaluation of the Spanish version of the MPI-SCI	2013	Pubmed
Morales	Psychometric properties of the Child Health Assessment Questionnaire (CHAQ) applied to children and adolescents with cerebral palsy	2008	Pubmed
Hirsh	Psychometric properties of the community integration questionnaire in a heterogeneous sample of adults with physical disability	2011	Pubmed
Ballert	Psychometric properties of the Nottwil Environmental Factors Inventory Short Form	2015	Pubmed
Chase	Psychosocial adjustment of persons with spinal cord injury	1990	Pubmed
Richards	Psycho-social aspects of chronic pain in spinal cord injury	1980	Pubmed
Tran	Psychosocial aspects of spinal cord injury pain: a meta-analysis	2016	Pubmed
Jensen	Psychosocial factors and adjustment to chronic pain in persons with physical disabilities: a systematic review	2011	Pubmed
Anderson	Psychosocial factors associated with pressure sores	1979	Pubmed
Widerström-Noga	Psychosocial subgroups in persons with spinal cord injuries and chronic pain	2007	Pubmed
Appleton	'Pure' and 'complicated' forms of hereditary spastic paraplegia presenting in childhood	1991	Pubmed
McMeekin	Quadriplegia: focus on rehabilitation	1993	Pubmed
Delargy	Quadriplegic care: an assessment of the impact of the carer	1988	Pubmed
Jackson	Qualitative study of principles pertaining to lifestyle and pressure ulcer risk in adults with spinal cord injury	2010	Pubmed
Post	Quality of life after spinal cord injury	2005	Pubmed
Putzke	Quality of life after spinal cord injury caused by gunshot	2001	Pubmed
Hammell	Quality of life among people with high spinal cord injury living in the community	2004	Pubmed
Winthrop	Quality of life and functional outcome after pediatric trauma	2005	Pubmed
Westgren	Quality of life and traumatic spinal cord injury	1998	Pubmed
King	Quality of life assessment with the medical outcomes study short form-36 among patients with cervical spondylotic myelopathy	2003	Pubmed
Gerhart	Quality of life following spinal cord injury: knowledge and attitudes of emergency care providers	1994	Pubmed
Matsunaga	Quality of life in elderly patients with ossification of the posterior longitudinal ligament	2001	Pubmed
Pannek	Quality of life in German-speaking patients with spinal cord injuries and bladder dysfunctions. Validation of the German version of the Qualiveen questionnaire	2007	Pubmed
Gurcay	Quality of life in patients with spinal cord injury	2010	Pubmed
Bach	Quality of life in quadriplegic adults: a focus group study	1993	Pubmed
Rognoni	Quality of life of patients with spinal cord injury in Italy: preliminary evaluation	2014	Pubmed
Hu	Quality of life of traumatic spinal cord injured patients in Hong Kong.	2008	Pubmed
Norrbrink Budh	Quality of sleep in individuals with spinal cord injury: a comparison between patients with and without pain	2005	Pubmed
Yerxa	Quality of time use by adults with spinal cord injuries	1990	Pubmed
Cooper	Quality-of-life technology for people with spinal cord injuries	2010	Pubmed
Whiteneck	Quantifying environmental factors: a measure of physical, attitudinal, service, productivity, and policy barriers	2004	Pubmed
Whiteneck	Quantifying environmental factors: a measure of physical, attitudinal, service, productivity, and policy barriers.	2004	Pubmed
Whiteneck	Quantifying handicap: a new measure of long-term rehabilitation outcomes	1992	Pubmed
Harvey	Quantifying the magnitude of torque physiotherapists apply when stretching the hamstring muscles of people with spinal cord injury	2003	Pubmed
Harvey	Quantifying the magnitude of torque physiotherapists apply when stretching the hamstring muscles of people with spinal cord injury.	2003	Pubmed
Smith	Quantitative comparison of grasp and release abilities with and without functional neuromuscular stimulation in adolescents with tetraplegia	1996	Pubmed
Shirado	Quantitative evaluation of long sitting in paraplegic patients with spinal cord injury.	2004	Pubmed
Putzke	Race: predictor versus proxy variable? Outcomes after spinal cord injury	2002	Pubmed
Fyffe	Racial and ethnic disparities in functioning at discharge and follow-up among patients with motor complete spinal cord injury	2014	Pubmed
Walker	Racial-ethnic variations in paid and unpaid caregiving: Findings among persons with traumatic spinal cord injury	2015	Pubmed
Kida	Radiation therapy for metastatic spinal tumors	2000	Pubmed
Chen	Raffinee in the treatment of spinal cord injury: an open-labeled clinical trial	2005	Pubmed
Nakajima	Rapidly progressive neuropathic arthropathy of the knee in possible association with a huge extruded cervical intervertebral disc herniation	2010	Pubmed
Itzkovich	Rasch analysis of the Catz-Itzkovich spinal cord independence measure	2002	Pubmed
Dumont	Rasch modeling and the measurement of social participation.	2003	Pubmed
Hills	Read my lips	2000	Pubmed
Moore	Real-world applications for brain-computer interface technology	2003	Pubmed
Creighton	Reasoning and the art of therapy for spinal cord injury	1995	Pubmed
Stanback	Rebuilding lives after injury	2014	Pubmed
Giuffrida	Reciprocal EMG control of elbow extension by FES	2001	Pubmed
Mayer	Reciprocal strength ratio in shoulder abduction/adduction in sports and daily living	2001	Pubmed
Vanden Berghe	Reconstruction of the upper extremity in tetraplegia: functional assessment, surgical procedures and rehabilitation	1991	Pubmed
Ainsley	Reconstructive hand surgery for quadriplegic persons	1985	Pubmed
Lim	Recovery and regeneration after spinal cord injury: a review and summary of recent literature	2007	Pubmed
Curt	Recovery from a spinal cord injury: significance of compensation, neural plasticity, and repair	2008	Pubmed
Rao	Recovery in non-vascular locked-in syndrome during treatment with Sinemet	1989	Pubmed
Ditunno	Recovery patterns are observable, predictable and reflect therapist-measured assessments of how well a person is able to perform specific tasks	2009	Pubmed
Middleton	Reexamining the Validity and Dimensionality of the Moorong Self-Efficacy Scale: Improving Its Clinical Utility.	2016	Pubmed
Estwick	Rehabilitating the patient with central cervical cord compression	1973	Pubmed
De Vivo	Rehabilitation adds life to years	1991	Pubmed
Koch-Borner	Rehabilitation After Posterior Deltoid to Triceps Transfer in Tetraplegia.	2016	Pubmed
Johanson	Rehabilitation After Surgical Reconstruction to Restore Function to the Upper Limb in Tetraplegia: A Changing Landscape	2016	Pubmed
House	Rehabilitation and future participation of youth following spinal cord injury: caregiver perspectives	2009	Pubmed
Kurihara	Rehabilitation approach to children with sequelae of hypoxic encephalopathy	1998	Pubmed
Nam	Rehabilitation challenges in craniospinal injury: two case reports	1996	Pubmed
Dollfus	Rehabilitation following injury to the spinal cord.	1993	Pubmed
Sato	Rehabilitation for paraplegia caused by neuromyelitis optica: a case report.	2014	Pubmed
Saur	Rehabilitation for paraplegics	2015	Pubmed
Haas	Rehabilitation goals of people with spinal cord injuries can be classified against the International Classification of Functioning, Disability and Health Core Set for spinal cord injuries	2016	Pubmed
Lewis	Rehabilitation in a rural setting of a young quadriplegic accident victim. Integrative clinicopathological conference: medical, psychosocial, economic, preventive, and ethical dimensions of a case study	1985	Pubmed
Formica	Rehabilitation in neuro-oncology: a meta-analysis of published data and a mono-institutional experience	2011	Pubmed
Keppler	Rehabilitation in spinal cord injury	1987	Pubmed
Rauch	Rehabilitation needs assessment in persons with spinal cord injury following the 2010 earthquake in Haiti: a pilot study using an ICF-based tool	2011	Pubmed
Ford	Rehabilitation of a quadriplegic	1971	Pubmed
Miake	Rehabilitation of adult spinal cord injuries	1986	Pubmed
Mathé	Rehabilitation of paraplegic patients	1988	Pubmed
Apte-Kakade	Rehabilitation of patients with quadriparesis after treatment of status asthmaticus with neuromuscular blocking agents and high-dose corticosteroids	1991	Pubmed
James	Rehabilitation of patients with traumatic cord lesions	1981	Pubmed
Kirshblum	Rehabilitation of persons with central nervous system tumors	2001	Pubmed
Tuel	Rehabilitation of quadriparesis secondary to spinal cord sarcoidosis.	1991	Pubmed
Suyama	Rehabilitation of spinal cord injury in the national rehabilitation center for the disabled of Japan: profile of a spinal service	1997	Pubmed
King	Rehabilitation of the patient with a spinal cord injury	1980	Pubmed
Panchal	Rehabilitation of the patient with spinal cord injury	1980	Pubmed
Woolsey	Rehabilitation outcome following spinal cord injury	1985	Pubmed
Drewes	Rehabilitation outcome for patients with spinal cord injury	1989	Pubmed
McKinley	Rehabilitation outcome of individuals with nontraumatic myelopathy resulting from spinal stenosis	1998	Pubmed
Forer	Rehabilitation outcome: comparative analysis of different patient types	1980	Pubmed
Yarkony	Rehabilitation outcomes in complete C5 quadriplegia.	1988	Pubmed
Yarkony	Rehabilitation outcomes in patients with complete thoracic spinal cord injury.	1990	Pubmed
Kennedy	Rehabilitation outcomes in people with pre-morbid mental health disorders following spinal cord injury	2009	Pubmed
Cruise	Rehabilitation outcomes in the older adult	2006	Pubmed
Tooth	Rehabilitation outcomes in traumatic spinal cord injury in Australia: functional status, length of stay and discharge setting	2003	Pubmed
Meiner	Rehabilitation outcomes of terror victims with multiple trauma: the experience in Hadassah University Hospital 2000-2004	2008	Pubmed
Schwartz	Rehabilitation outcomes of terror victims with multiple traumas	2007	Pubmed
Deng	Rehabilitation therapy in early stage following spinal cord injuries	2004	Pubmed
P Dijkers	Rehabilitation treatment taxonomy: implications and continuations	2014	Pubmed
McKinley	Rehabilitative functional outcome of patients with neoplastic spinal cord compressions	1996	Pubmed
Mukand	Rehabilitative management of polyarteritis: a case report.	1997	Pubmed
Meyers	Rehospitalization and spinal cord injury: cross-sectional survey of adults living independently	1985	Pubmed
Backus	Relation between inpatient and postdischarge services and outcomes 1 year postinjury in people with traumatic spinal cord injury	2013	Pubmed
Hamilton	Relation of disability costs to function: spinal cord injury	1999	Pubmed
Gersten	Relation of muscle strength and range of motion to activities of daily living	1970	Pubmed
Whiteneck	Relationship of patient characteristics and rehabilitation services to outcomes following spinal cord injury: the SCIRehab project	2012	Pubmed
Mizukami	Relationship between functional levels and movement in tetraplegic patients. A retrospective study	1995	Pubmed
Beninato	Relationship between motor FIM and muscle strength in lower cervical-level spinal cord injuries	2004	Pubmed
Kramer	Relationship between motor recovery and independence after sensorimotor-complete cervical spinal cord injury	2012	Pubmed
Liu	Relationship between neurogenic bowel dysfunction and health-related quality of life in persons withspinal cord injury	2009	Pubmed
Bracken	Relationship between neurological and functional status after acute spinal cord injury: an epidemiological study	1980	Pubmed
Gates	Relationship between parental PODCI questionnaire and School Function Assessment in measuring performance in children with CP	2008	Pubmed
Janssen	Relationship between physical strain during standardised ADL tasks and physical capacity in men with spinal cord injuries	1994	Pubmed
Koehler	Relationship between self-concept and successful rehabilitation	1989	Pubmed
Samsa	Relationship between self-reported disability and caregiver hours	2001	Pubmed
Samsa	Relationship between self-reported disability and caregiver hours.	2001	Pubmed
Fujiwara	Relationship between shoulder muscle strength and functional independence measure (FIM) score among C6 tetraplegics	1999	Pubmed
Noreau	Relationship of impairment and functional ability to habitual activity and fitness following spinal cord injury	1993	Pubmed
Fuhrer	Relationship of life satisfaction to impairment, disability, and handicap among persons with spinal cord injury living in the community	1992	Pubmed
Bailey	Relationship of nursing education and care management inpatient rehabilitation interventions and patient characteristics to outcomes following spinal cord injury: the SCIRehab project	2012	Pubmed
Ozelie	Relationship of occupational therapy inpatient rehabilitation interventions and patient characteristics to outcomes following spinal cord injury: the SCIRehab project.	2012	Pubmed
Teeter	Relationship of physical therapy inpatient rehabilitation interventions and patient characteristics to outcomes following spinal cord injury: the SCIRehab project	2012	Pubmed
Cahow	Relationship of therapeutic recreation inpatient rehabilitation interventions and patient characteristics to outcomes following spinal cord injury: the SCIRehab project	2012	Pubmed
Widerström-Noga	Relationships among clinical characteristics of chronic pain after spinal cord injury.	2001	Pubmed
Fuhrer	Relationships between independent living centers and medical rehabilitation programs	1990	Pubmed
van Leeuwen	Relationships between activities, participation, personalfactors, mental health, and life satisfaction in persons with spinal cord injury	2012	Pubmed
Heinemann	Relationships between disability measures and nursing effort during medical rehabilitation for patients with traumatic brain and spinal cord injury	1997	Pubmed
Johnstone	Relationships between the Brief Multidimensional Measure of Religiousness/Spirituality and health outcomes for a heterogeneous rehabilitation population	2009	Pubmed
Curtis	Reliability and validity of the Wheelchair User's Shoulder Pain Index (WUSPI)	1995	Pubmed
Poncumhak	Reliability and validity of three functional tests in ambulatory patients with spinal cord injury	2013	Pubmed
Badke	Reliability of a functional mobility assessment tool with application to neurologically impaired patients: a preliminary report	1993	Pubmed
van Langeveld	Reliability of a new classification system for mobility and self-care in spinal cord injury rehabilitation: the Spinal Cord Injury-Interventions Classification System	2009	Pubmed
Jacobs	Reliability of arm Wingate Anaerobic Testing in persons with complete paraplegia	2003	Pubmed
Ishikawa	Reliability of daily step activity monitoring in adults with incomplete spinal cord injury	2011	Pubmed
Janssen	Reliability of heart rate responses to non-steady-state activities of daily living in men with spinal cord injuries	1994	Pubmed
Itzkovich	Reliability of the Catz-Itzkovich Spinal Cord Independence Measure assessment by interview and comparison with observation	2003	Pubmed
Baunsgaard	Reliability of the International Spinal Cord Injury Musculoskeletal Basic Data Set	2016	Pubmed
Yang	Remote monitoring of sitting behaviors for community-dwelling manual wheelchair users with spinal cord injury	2009	Pubmed
Yang	Remote monitoring of sitting behaviors for community-dwelling manual wheelchair users with spinal cord injury.	2009	Pubmed
Biering-Sørensen	Reproducibility and validity of a questionnaire filled in by spinal cord lesioned individuals before regular follow-up	2001	Pubmed
Gellman	Rerouting of the biceps brachii for paralytic supination contracture of the forearm in tetraplegia due to trauma	1994	Pubmed
Lee	Research Group. Medication use is associated with fatigue in a sample of community-living individuals who have a spinal cord injury: a chart review	2010	Pubmed
Bergmark	Residence and quality of life determinants for adults with tetraplegia of traumatic spinal cord injury etiology	2008	Pubmed
Battalio	Resilience and Function in Adults With Physical Disabilities: An Observational Study	2017	Pubmed
Elliott	Resilience in the initial year of caregiving for a family member with a traumatic spinal cord injury	2014	Pubmed
Elliott	Resilience in the initial year of caregiving for a family member with a traumaticspinal cord injury	2014	Pubmed
Silverman	Resilience predicts functional outcomes in people aging with disability: a longitudinal investigation	2015	Pubmed
Postma	Resistive inspiratory muscle training in people with spinal cord injury during inpatient rehabilitation: a randomized controlled trial.	2014	Pubmed
Lamid	Respirator-dependent quadriplegics: problems during the weaning period.	1985	Pubmed
Oleson	Responsiveness and concurrent validity of the revised capabilities of upper extremity-questionnaire (CUE-Q) in patients with acute tetraplegia	2014	Pubmed
DeBenedetti	Restoration of elbow extension power in the tetraplegic patient using the Moberg technique	1979	Pubmed
Doi	Restoration of prehension with the double free muscle technique following complete avulsion of the brachial plexus. Indications and long-term results	2000	Pubmed
Hobby	Restoration of tetraplegic hand function by use of the neurocontrol freehand system	2001	Pubmed
Bouton	Restoring cortical control of functional movement in a human with quadriplegia	2016	Pubmed
Knox	Results of a survey on the use of a wrist-driven splint for prehension	1971	Pubmed
Berard	Results of rehabilitation in central cord syndromes	1977	Pubmed
New	Retrospective case series of outcomes following spinal cord infarction	2012	Pubmed
Holtslag	Return to work after major trauma	2007	Pubmed
Yasuda	Return to work after spinal cord injury: a review of recent research	2002	Pubmed
Shem	Return to work and school: a model mentoring program for youth and young adults with spinal cord injury	2011	Pubmed
Shem	Return to work and school: a model mentoring program for youth and young adults with spinal cord injury.	2011	Pubmed
Targett	Return to work for persons with spinal cord injury: designing work supports	2004	Pubmed
Smith	Returning an Employee With Newly Diagnosed Tetraplegia to Work	2016	Pubmed
Bergmark	Returning to work after spinal cord injury: exploring young adults' early expectations and experience	2011	Pubmed
del-Ama	Review of hybrid exoskeletons to restore gait following spinal cord injury	2012	Pubmed
Sydor	Risk analysis for operating active wheelchairs in non-urban settings	2017	Pubmed
DiVita	Risk Factors for Development of New or Worsened Pressure Ulcers Among Patients in Inpatient Rehabilitation Facilities in the United States: Data From the Uniform Data System for Medical Rehabilitation	2015	Pubmed
Cheung	Robot-Assisted Training for People With Spinal Cord Injury: A Meta-Analysis	2017	Pubmed
Francisco	Robot-Assisted Training of Arm and Hand Movement Shows Functional Improvements for Incomplete Cervical Spinal Cord Injury	2017	Pubmed
Reynolds	Role of dorsal rhizotomy in spinal cord injury-induced spasticity.	2014	Pubmed
Pham	Rubber band as external assist device to provide simple grip for quadriplegic patients.	1988	Pubmed
Hill	Safety and Ethical Considerations in Discharging Patients to Suboptimal Living Situations	2015	Pubmed
Wangdell	Satisfaction and performance in patient selected goals after grip reconstruction in tetraplegia.	2010	Pubmed
Stroh	Satisfaction with and usage of a hand neuroprosthesis	1999	Pubmed
Yorkston	Satisfaction with participation in multiple sclerosis and spinal cord injury	2012	Pubmed
Rushton	Satisfaction with participation using a manual wheelchair among individuals with spinal cord injury	2010	Pubmed
Gregersen	Satisfaction with upper extremity surgery in individuals with tetraplegia	2015	Pubmed
Wuolle	Satisfaction with upper-extremity surgery in individuals with tetraplegia.	2003	Pubmed
Pahys	Scapular stabilization in patients with spinal cord injury	2009	Pubmed
Cook	School-based use of a robotic arm system by children with disabilities	2005	Pubmed
Duci	SCI home care: transitional rehabilitation as a component of follow-up care	1986	Pubmed
Krause	SCI Longitudinal Aging Study: 40 Years of Research	2015	Pubmed
Barker	SCI patients take a big step forward	2005	Pubmed
Bluvshtein	SCIM III is reliable and valid in a separate analysis for traumatic spinal cord lesions	2011	Pubmed
Catz	SCIM--spinal cord independence measure (version II): sensitivity to functional changes	2002	Pubmed
Catz	SCIM--spinal cord independence measure: a new disability scale for patients with spinal cord lesions	1997	Pubmed
Sawatzky	SCIRE Research Team. Classification and measurement of pain in the spinal cord-injured population	2008	Pubmed
Ozelie	SCIRehab Project series: the occupational therapy taxonomy	2009	Pubmed
Natale	SCIRehab Project series: the physical therapy taxonomy	2009	Pubmed
Cahow	SCIRehab Project series: the therapeutic recreation taxonomy	2009	Pubmed
Wells	Scoring acute spinal cord injury: a study of the utility and limitations of five different grading systems	1995	Pubmed
Nilsson	Scoring alternatives for FIM in neurological disorders applying Rasch analysis	2005	Pubmed
Field-Fote	Seated reach distance and trunk excursion accurately reflect dynamic postural control in individuals with motor-incomplete spinal cord injury	2010	Pubmed
Kroll	Secondary conditions in spinal cord injury: results from a prospective survey	2007	Pubmed
Callaway	Secondary health conditions experienced by people with spinal cord injury within community living: implications for a National Disability Insurance Scheme	2015	Pubmed
Adriaansen	Secondary health conditions in persons with a spinal cord injury for at least 10 years: design of a comprehensive long-term cross-sectional study	2013	Pubmed
Heilman	Selection of an optimal muscle set for a 16-channel standing neuroprosthesis using a human musculoskeletal model	2006	Pubmed
Phillips	Selective alpha adrenergic antagonist reduces severity of transient hypertension during sexual stimulation after spinal cord injury	2014	Pubmed
Iwatsubo	Selective intrathecal phenol block to improve activities of daily living in patients with spastic quadriplegia. A preliminary report.	1994	Pubmed
Matsuo	Selective lengthening of the psoas and rectus femoris and preservation of the iliacus for flexion deformity of the hip in cerebral palsy patients	1987	Pubmed
Kumakura	Self-assessed secondary difficulties among paralytic poliomyelitis and spinal cord injury survivors in Japan	2002	Pubmed
McFarland	Self-care assessment tool for spinal cord injured persons	1992	Pubmed
Boss	Self-care competence among persons with spinal cord injury	1995	Pubmed
Taylor	Self-care in the community	1991	Pubmed
Olson	Self-care needs of patients in the halo brace	1990	Pubmed
Hammell	Self-care, productivity, and leisure, or dimensions of occupational experience? Rethinking occupational "categories"	2009	Pubmed
Bernuz	Self-catheterization acquisition after hand reanimation protocols in C5-C7 tetraplegic patients.	2011	Pubmed
Crivelli	Self-catheterization activity in women with quadriplegia: occupational therapy and achievement of independence	2016	Pubmed
Green	Self-concept among persons with long-term spinal cord injury	1984	Pubmed
Yetzer	Self-concept and body image in persons who are spinal cord injured with and without lower limb amputation	2003	Pubmed
Runge	Self-dressing techniques for patients with spinal cord injury	1967	Pubmed
Woll	Self-help training in paraplegics	1975	Pubmed
Davis	Self-reported use of an implanted FES hand system by adolescents with tetraplegia	1998	Pubmed
Bode	Self-scoring templates for motor and cognitive subscales of the FIM instrument for persons with spinal cord injury	2014	Pubmed
Martinsen	Sensitive cooperation: a basis for assisted feeding	2009	Pubmed
Lonini	Sensor Fusion to Infer Locations of Standing and Reaching Within the Home in Incomplete Spinal Cord Injury	2017	Pubmed
Nathan	Sensory effects in man of lesions of the posterior columns and of some other afferent pathways	1986	Pubmed
Moussavi	Serum levels of vitamins A, C, and E in persons with chronic spinal cord injury living in the community	2003	Pubmed
Post	Services for spinal cord injured: availability and satisfaction	1997	Pubmed
Zhang	Several time indicators and Barthel index relationships at different spinal cord injury levels	2015	Pubmed
Lorenz	Severe Brain Injury in Massachusetts: Assessing the Continuum of Care	2015	Pubmed
Celik	Sex hormone levels and functional outcomes: a controlled study of patients with spinal cord injury compared with healthy subjects	2007	Pubmed
White	Sexual activities, concerns and interests of women with spinal cord injury living in the community	1993	Pubmed
Nwuga	Sexual adjustment among upper class Nigerian male paraplegics and tetraplegics	1982	Pubmed
Sidman	Sexual functioning and the physically disabled adult	1977	Pubmed
Block	Shake-It-Up: health promotion and capacity building for people with spinal cord injuries and related neurological disabilities	2005	Pubmed
Dijkers	Short versions of the telephone motor Functional Independence Measure for use with persons with spinal cord injury	1999	Pubmed
Glinsky	Short-term progressive resistance exercise may not be effective at increasing wrist strength in people with tetraplegia: a randomised controlled trial	2008	Pubmed
Vastamäki	Short-term versus long-term comparative results after reconstructive upper-limb surgery in tetraplegic patients	2006	Pubmed
Morrow	Shoulder demands in manua wheelchair users across a spectrum of activities	2010	Pubmed
Salisbury	Shoulder pain following tetraplegia: a follow-up study 2-4 years after injury.	2006	Pubmed
Alm	Shoulder pain in persons with thoracic spinal cord injury: prevalence and characteristics.	2008	Pubmed
Alm	Shoulder pain in persons with thoracic spinal cord injury: prevalence and characteristics.	2008	Pubmed
Curtis	Shoulder pain in wheelchair users with tetraplegia and paraplegia.	1999	Pubmed
Yildirim	Shoulder pain: a comparison of wheelchair basketball players with trunk control and without trunk control	2010	Pubmed
Gillette	Simulation of functional neuromuscular stimulation assisted sit-to-stand movements	2003	Pubmed
Paul	Single-stage reconstruction of key pinch and extension of the elbow in tetraplegic patients	1994	Pubmed
Cook	Six patient-reported outcome measurement information system short form measures have negligible age- or diagnosis-related differential item functioning in individuals with disabilities	2012	Pubmed
Mourcou	Smartphone-based approach to assess and improve accessibility for wheelchair users	2013	Pubmed
Kiwerski	Social and occupational problems of paraplegia and tetraplegia	1981	Pubmed
Kiwerski	Social and professional evaluation of para and tetraplegics	1982	Pubmed
Forner	Social and working conditions of our paraplegics	1976	Pubmed
Fougeyrollas	Social consequences of long term impairments and disabilities: conceptual approach and assessment of handicap	1998	Pubmed
Michelsen	Social integration of adults with cerebral palsy	2006	Pubmed
Müller	Social skills: a resource for more social support, lower depression levels, higher quality of life, and participation in individuals with spinal cord injury?	2015	Pubmed
van Leeuwen	Social support and life satisfaction in spinal cord injury during and up to one year after inpatient rehabilitation	2010	Pubmed
Spencer	Socialization to the culture of a rehabilitation hospital: an ethnographic study.	1995	Pubmed
Sollerman	Sollerman hand function test. A standardised method and its use in tetraplegic patients	1995	Pubmed
Sköld	Spasticity after traumatic spinal cord injury: nature, severity, and location	1999	Pubmed
Pfister	Spasticity in adults living in a developmental center	2003	Pubmed
St George	Spasticity. Mechanisms and nursing care	1993	Pubmed
Lundqvist	Spinal arteriovenous malformations. Health-related quality of life after embolization.	1994	Pubmed
Faria	Spinal brucellosis: a personal experience of nine patients and a review of the literature	1995	Pubmed
Hicks	Spinal cord compression: the hospice perspective	1993	Pubmed
Curtis	Spinal cord compromise: an important but underdiagnosed condition in people with mental retardation	2004	Pubmed
Delparte	Spinal cord essentials: The development of an individualized, handout-based patient and family education initiative for people with spinal cord injury	2014	Pubmed
Glass	Spinal Cord Independence Measure, version III: applicability to the UK spinal cord injured population	2009	Pubmed
Catz	Spinal Cord Independence Measure: comprehensive ability rating scale for the spinal cord lesion patient	2007	Pubmed
Dewis	Spinal cord injured adolescents and young adults: the meaning of body changes	1989	Pubmed
Owen	Spinal cord injured graduates of a transitional residential program: an evaluation of thirty-three	1982	Pubmed
Lysberg	Spinal cord injured women's views of sexuality: a Norwegian survey	2003	Pubmed
Harris	Spinal cord injuries	1986	Pubmed
Knútsdóttir	Spinal cord injuries in Iceland 1973-1989. A follow up study	1993	Pubmed
Lundqvist	Spinal cord injuries. Clinical, functional, and emotional status.	1991	Pubmed
Lundqvist	Spinal cord injuries: a shortened measure of function and mood	1997	Pubmed
Partridge	Spinal cord injuries: aspects of psychological care	1994	Pubmed
Craig	Spinal cord injury and pregnancy: the stories of two women	1994	Pubmed
Ragnarsson	Spinal cord injury clinical trials for neurologic restoration: improving care through clinical research	2005	Pubmed
Hasegawa	Spinal cord injury hospitalisation in a rehabilitation hospital in Japan	1994	Pubmed
Pérez-de la Cruz	Spinal cord injury in pediatric age in Spain. Reality of a national reference center	2015	Pubmed
Kirshblum	Spinal cord injury medicine. 3. Rehabilitation phase after acute spinal cord injury.	2007	Pubmed
Scelza	Spinal cord injury medicine. 4. Community reintegration after spinal cord injury	2007	Pubmed
Groah	Spinal cord injury medicine. 5. Preserving wellness and independence of the aging patient with spinal cord injury: a primary care approach for the rehabilitation medicine specialist	2002	Pubmed
Yarkony	Spinal cord injury rehabilitation outcome: the impact of age	1988	Pubmed
Formal	Spinal cord injury rehabilitation. 3. Functional outcomes	1997	Pubmed
Noreau	Spinal cord injury, exercise and quality of life	1995	Pubmed
Cushman	Spinal cord injury: 10 and 15 years after	1992	Pubmed
Crewe	Spinal cord injury: a comparison of preinjury and postinjury marriages	1979	Pubmed
Slavin	Spinal Cord Injury-Functional Index/Assistive Technology Short Forms	2016	Pubmed
Tulsky	Spinal cord injury-functional index: item banks to measure physical functioning in individuals with spinal cord injury	2012	Pubmed
Pagliacci	Spinal cord lesion management in Italy: a 2-year survey	2003	Pubmed
Gregg	Spinal cord lesions and rehabilitation: Review of cases discharged from the Duke Medical Center	1968	Pubmed
North	Spinal cord stimulation for chronic, intractable pain: experience over two decades	1993	Pubmed
Buckley	Spinal cord trauma.	1999	Pubmed
Zafonte	Spinal epidural abscess: study of early outcome	2003	Pubmed
Suyama	Spinal flexibility and activities of daily living for the thoracic and lumbar spinal cord injured--comparison of a non operated group with an internal spinal fused group	1990	Pubmed
Shelly	Spinal injuries in Irish rugby: a ten-year review	2006	Pubmed
Ohry	Spinal injury rehabilitation complicated by psycho-social problems	1998	Pubmed
Yen	Spinal injury rehabilitation in Singapore	1998	Pubmed
Mohanty	Spinal intramedullary cysticercosis	1997	Pubmed
Andary	Spinal myoclonus complicating spasticity in spinal cord injury: a case study	1997	Pubmed
Becker	Spinal shock in traumatic lesions of the cervical spinal cord. 2 cases	1984	Pubmed
Owen	Spinal cord injured graduates of a transitional residential program: an evaluation of thirty-three.	1982	Pubmed
Chlan	Spirituality and life satisfaction in adults with pediatric-onset spinal cord injury	2011	Pubmed
Xian	Spontaneous spinal epidural hematomas: One case report and rehabilitation outcome	2017	Pubmed
Schüle	Sports therapy and rehabilitation sports--a health policy responsibility of rehabilitation	1996	Pubmed
Debeau	Springboard to a new life with a new body	2010	Pubmed
Anderson	Stability of transition to adulthood among individuals with pediatric-onset spinal cord injuries.	2006	Pubmed
Normell	Stabilization of spine fracture in paraplegic patients using a plaster cradle	1976	Pubmed
Nakanishi	Stabilizing transpelvic prosthetic socket for a patient with spinal cord injury sustaining right partial hemipelvectomy and left hip disarticulation.	2012	Pubmed
Cornwell	Standard task set for evaluating rehabilitation interventions for individuals with arm paralysis.	2012	Pubmed
Hill	Starting a new conversation: Engaging Veterans with spinal cord injury in discussions of what function means to them, the barriers/facilitators they encounter, and the adaptations they use to optimize function.	2017	Pubmed
van de Ven	Strategies for autonomy used by people with cervical spinal cord injury: a qualitative study	2008	Pubmed
McColl	Structural relationships between social support and coping	1995	Pubmed
Huber	Structured assessment for orthopaedic patients - method, results, and diagnostic potential	2014	Pubmed
Watkins	Studies cite poor use of patients' time in rehab hospitals	1989	Pubmed
Vall	Study of the quality of life in people with traumatic spinal cord injury	2006	Pubmed
Brillhart	Studying the quality of life and life satisfaction among persons with spinal cord injury undergoing urinary management	2004	Pubmed
Brillhart	Studying the quality of life and life satisfaction among persons with spinal cord injury undergoing urinary management.	2004	Pubmed
Gray	Subcutaneous pellet testosterone replacement therapy: the "first steps" in treating men with spinal cord injuries	2013	Pubmed
Dunn	Subjective health in spinal cord injury after outpatient healthcare follow-up.	2000	Pubmed
Laman	Subjective weighting of disability: an approach to quality of life assessment in rehabilitation	1994	Pubmed
Ville	Subjective well-being and severe motor impairments: the Tetrafigap survey on the long-term outcome of tetraplegic spinal cord injured persons	2001	Pubmed
Fuhrer	Subjective well-being: implications for medical rehabilitation outcomes and models of disablement	1994	Pubmed
Wang	Sublesional spinal vertebral bone mineral density correlates with neurological level and body mass index in individuals with chronic complete spinal cord injuries	2010	Pubmed
McKinley	Substance abuse, violence, and outcome after traumatic spinal cord injury	1999	Pubmed
Yaszemski	Sudden death from cord compression associated with atlanto-axial instability in rheumatoid arthritis	1990	Pubmed
Marino	Superiority of motor level over single neurological level in categorizing tetraplegia	1995	Pubmed
Protas	Supported treadmill ambulation training after spinal cord injury: a pilot study	2001	Pubmed
Popovic	Surface-stimulation technology for grasping and walking neuroprosthesis	2001	Pubmed
Hrabálek	Surgery for degenerative spondylolisthesis of the lumbar spine using intra-articular fusion. A prospective study	2014	Pubmed
Collins	Surgery in the acute treatment of spinal cord injury: a review of the past forty years	1995	Pubmed
Palmgren-Soppela	Surgery of the upper limbs can improve functional ability of a tetraplegic patient	2012	Pubmed
Goubier	Surgical decompression of cervical arthrotic myelopathies: comparison of surgical anterior and posterior approaches	2002	Pubmed
Robinson	Surgical decompression of impingement in the weightbearing shoulder	1993	Pubmed
Zrubecky	Surgical reconstruction of prehensile function in tetraplegics	1973	Pubmed
Lamb	Surgical reconstruction of the upper limb in traumatic tetraplegia. A review of 41 patients	1983	Pubmed
Johnstone	Surgical rehabilitation of the upper limb in quadriplegia	1987	Pubmed
Moberg	Surgical treatment for absent single-hand grip and elbow extension in quadriplegia. Principles and preliminary experience	1975	Pubmed
Omeis	Surgical treatment of C2 fractures in the elderly: a multicenter retrospective analysis	2009	Pubmed
Taylor	Surgical treatment of cervical spondylotic myelopathy in elderly patients	1991	Pubmed
Meyer	Surgical treatment of metastatic spinal tumors	2010	Pubmed
Onimus	Surgical treatment of vertebral metastasis	1986	Pubmed
Snoek	Survey of the needs of patients with spinal cord injury: impact and priority for improvement in hand function in tetraplegics	2004	Pubmed
Snoek	Survey of the needs of patients with spinal cord injury: impact and priority for improvement in hand function in tetraplegics.	2004	Pubmed
Arnet	SwiSCI study group. Determinants of handbike use in persons with spinal cord injury: results of a community survey in Switzerland	2016	Pubmed
Rocca	Swivel walkers	1978	Pubmed
Jensen	Symptom burden in persons with spinal cord injury	2007	Pubmed
January	Symptoms of depression over time in adults with pediatric-onset spinal cord injury.	2014	Pubmed
Bombardier	Symptoms of major depression in people with spinal cord injury: implications for screening.	2004	Pubmed
Pehlivan	System characterization of RiceWrist-S: a forearm-wrist exoskeleton for upper extremity rehabilitation	2013	Pubmed
Kwon	Systematic review: occupational physical activity and low back pain	2011	Pubmed
Kennedy	Taking rehab home	1991	Pubmed
Anderson	Targeting recovery: priorities of the spinal cord-injured population	2004	Pubmed
Heenan	Team jeopardy! Learning about living with spinal cord injury	1999	Pubmed
Dijkers	Team size in spinal cord injury inpatient rehabilitation and patient participation in therapy sessions: the SCIRehab project	2012	Pubmed
Morvan	Technical aids for the physically handicapped: a psychological study of the master robot.	1997	Pubmed
Dillner	Technical and clinical function testing of hand orthoses in Sweden	1979	Pubmed
Seplowitz	Technology and occupational therapy in the rehabilitation of the bedridden quadriplegic	1984	Pubmed
Bryden	Technology for spinal cord injury rehabilitation and its application to youth	2012	Pubmed
Rintala	Telephone versus face-to-face mode for collecting self-reports of sequences of behavior.	1991	Pubmed
Kim	Telerehabilitation needs: a bidirectional survey of health professionals and individuals with spinal cord injury in South Korea	2012	Pubmed
Kielhofner	Temporal adaptation: a conceptual framework for occupational therapy	1977	Pubmed
Wahle	Ten years follow-up of post-discharge training status of 50 patients with complete paraplegia	1991	Pubmed
Dunn	Tendon Transfer Surgery for People With Tetraplegia: An Overview.	2016	Pubmed
Freehafer	Tendon transfers in patients with cervical spinal cord injury	1991	Pubmed
Shepherd	Tenodesis brace use by persons with spinal cord injuries	1991	Pubmed
Land	Tetraplegia Hand Activity Questionnaire (THAQ): the development, assessment of arm-hand function-related activities in tetraplegic patients with a spinal cord injury	2004	Pubmed
Coe	Tetraplegia: put yourself in my place.	1983	Pubmed
Landi	Tetraplegia: update on assessment	2002	Pubmed
Misra	Thallium poisoning: emphasis on early diagnosis and response to haemodialysis	2003	Pubmed
Meyers	The "Boston model" of managed care and spinal cord injury: a cross-sectional study of the outcomes of risk-based, prepaid, managed care.	1999	Pubmed
Ardolino	The ABLE scale: the development and psychometric properties of an outcome measure for the spinal cord injury population	2012	Pubmed
Craig	The adaptation to pregnancy of spinal cord injured women	1990	Pubmed
Smith	The application of a modified neuroprosthetic hand system in a child with a C7 spinal cord injury. Case report	1992	Pubmed
Caizhong	The application of somatosensory evoked potentials in spinal cord injury rehabilitation	2014	Pubmed
Klemz	The arduous road to recovery	1992	Pubmed
Tsai	The association of assistive mobility devices and social participation in people with spinal cord injuries	2014	Pubmed
Chan	The average cost of pressure ulcer management in a community dwelling spinal cord injury population	2013	Pubmed
Makris	The Barthel Index in assessing the response to palliative radiotherapy in malignant spinal cord compression: a prospective audit	1995	Pubmed
Moraleda-Barreno	The Battelle developmental inventory screening test for early detection of developmental disorders in cerebral palsy	2011	Pubmed
Marino	The Capabilities of Upper Extremity instrument: reliability and validity of a measure of functional limitation in tetraplegia	1998	Pubmed
Meester-Delver	The Capacity Profile: a method to classify additional care needs in children with neurodevelopmental disabilities	2007	Pubmed
Catz	The Catz-Itzkovich SCIM: a revised version of the Spinal Cord Independence Measure	2001	Pubmed
Kawamura	The clinical features of spasms in patients with a cervical cord injury	1989	Pubmed
Hata	The combined associations of social participation and support with self-rated health and dietary satisfaction in men with spinal cord injury	2016	Pubmed
Bötel	The cost of ventilator-dependent spinal cord injuries-patients in the hospital and at home	1997	Pubmed
Markus	The course of rehabilitation in patients with locked-in syndrome	1992	Pubmed
Plantinga	The criterion-related validity of the Northwick Park Dependency Score as a generic nursing dependency instrument for different rehabilitation patient groups	2006	Pubmed
Hagglund	The current state of personal assistance services: implications for policy and future research	2004	Pubmed
Riener	The Cybathlon promotes the development of assistive technology for people with physical disabilities	2016	Pubmed
Lu	The development of an upper limb stroke rehabilitation robot: identification of clinical practices and design requirements through a survey of therapists	2011	Pubmed
Frazier	The development of a nurse-directed computerized functional electrical stimulation program	1999	Pubmed
Hitzig	The development of the spinal cord injury participation and quality of life (PAR-QoL) tool-kit	2013	Pubmed
Hastings	The differences in self-esteem, function, and participation between adults with low cervical motor tetraplegia who use power or manual wheelchairs.	2011	Pubmed
Krahn	The dilemma of measuring perceived health status in the context of disability	2009	Pubmed
Grover	The effect of a flexion contracture of the elbow on the ability to transfer in patients who have quadriplegia at the sixth cervical level	1996	Pubmed
Kennedy	The effect of a specialist seating assessment clinic on the skin management of individuals with spinal cord injury	2003	Pubmed
Pentland	The effect of aging and duration of disability on long term health outcomes following spinal cord injury	1995	Pubmed
Yilmaz	The effect of autonomic nervous system dysfunction on oxygen consumption during daily living activities in patients with spinal cord injury	2017	Pubmed
Cromwell	The effect of botulinum toxin A on the function if a person with poststroke quadriplegia	1996	Pubmed
Janssen-Potten	The effect of footrests on sitting balance in paraplegic subjects	2002	Pubmed
Newman	The effect of supported standing in adults with upper motor neurone disorders: a systematic review	2012	Pubmed
Klefbeck	The effect of trunk support on performance during arm ergometry in patients with cervical cord injuries	1996	Pubmed
Richards	The effectiveness of different methods of defining traumatic brain injury in predicting postdischarge adjustment in a spinal cord injury population	1991	Pubmed
Rinkaewkan	The effectiveness of inpatients rehabilitation for spinal cord patients in Siriraj hospital	2015	Pubmed
Dunn	The effects of aging on upper limb tendon transfers in patients with tetraplegia.	2014	Pubmed
Tate	The effects of insurance benefits coverage on functional and psychosocial outcomes after spinal cord injury	1994	Pubmed
Dost	The effects of upper extremity progressive resistance and endurance exercises in patients with spinal cord injury	2014	Pubmed
Saltzstein	The efficacy of colostomy as a bowel management alternative in selected spinal cord injury patients	1990	Pubmed
Milross	The efficacy of treatment for malignant epidural spinal cord compression	1997	Pubmed
Ahmadi Bani	The efficiency of mechanical orthoses in affecting parameters associated with daily living in spinal cord injury patients: a literature review	2015	Pubmed
Meyers	The epidemiology of medical care utilization by severely-disabled independently-living adults	1988	Pubmed
Barbetta	The experience of using the scale of functional independence measure in individuals undergoing spinal cord injury rehabilitation in Brazil	2014	Pubmed
Jannings	The experiences and needs of persons with spinal cord injury who can walk	2012	Pubmed
Jannings	The experiences and needs of persons with spinal cord injury who can walk.	2012	Pubmed
Pilsecker	The first six months posthospital for spinal cord-injured veterans	1990	Pubmed
Taylor	The functional impact of the Freehand System on tetraplegic hand function. Clinical Results	2002	Pubmed
Karamehmetoğlu	The functional independence measure in spinal cord injured patients: comparison of questioning with observational rating	1997	Pubmed
Grey	The Functional Independence Measure: a comparative study of clinician and self ratings	1993	Pubmed
Vosloo	The functioning of primary school learners with paraplegia/paraparesis in mainstream schools in the Western Cape, South Africa. An exploratory study	2009	Pubmed
Glegg	The GestureTek virtual reality system in rehabilitation: a scoping review	2014	Pubmed
Fritsch	The handicapped, no future?	1985	Pubmed
Deconinck	The health condition of spinal cord injuries in two Afghan towns	2003	Pubmed
Van de Velde	The illusion and the paradox of being autonomous, experiences from persons with spinal cord injury in their transition period from hospital to home	2012	Pubmed
Carver	The impact of mobility assistive technology devices on participation for individuals with disabilities	2016	Pubmed
Kirshblum	The impact of sacral sensory sparing in motor complete spinal cord injury	2011	Pubmed
Pentland	The impact of spinal cord injury on men's time use	1999	Pubmed
Toro	The impact of transfer setup on the performance of independent wheelchair transfers	2013	Pubmed
Mackenzie	The impact of trauma-center care on functional outcomes following major lower-limb trauma	2008	Pubmed
Lüthi	The individual experience of functioning and disability in Switzerland—patient perspective and person-centeredness in spinal cord injury	2011	Pubmed
Isaksson	The influence of social support on the rehabilitation of women with spinal cord injury: experiences recounted by occupational therapists	2012	Pubmed
IJzerman	The influence of the reciprocal cable linkage in the advanced reciprocating gait orthosis on paraplegic gait performance	1997	Pubmed
Edelaar	The influence of time and adaptation on health state valuations in patients with spinal cord injury	2012	Pubmed
Widerström-Noga	The international spinal cord injury pain basic data set	2008	Pubmed
Ditunno	The John Stanley Coulter Lecture. Predicting recovery after spinal cord injury: a rehabilitation imperative	1999	Pubmed
Kinnaman	The last word	1970	Pubmed
Nicklas	The life situation of spinal cord injured persons in a medical facility and in every day life--a socio-medical study of 246 spinal cord injured persons	1980	Pubmed
Ostrum	The 'locked-in' syndrome--comments from a survivor	1994	Pubmed
Daverat	The long term outcome in 149 patients with spinal cord injury	1995	Pubmed
Newey	The long-term outcome after central cord syndrome: a study of the natural history	2000	Pubmed
Eliasson	The Manual Ability Classification System (MACS) for children with cerebral palsy: scale development and evidence of validity and reliability	2006	Pubmed
Ide-Okochi	The meaning of self-care in persons with cervical spinal cord injury in Japan: a qualitative study	2013	Pubmed
Stewart	The measurement properties of fitness measures and health status for persons with spinal cord injuries	2000	Pubmed
Löfvenmark	'The moment I leave my home - there will be massive challenges': experiences of living with a spinal cord injury in Botswana	2016	Pubmed
Dieruf	The natural-fit handrim: factors related to improvement in symptoms and function in wheelchair users	2008	Pubmed
Kennedy	The needs assessment checklist: a clinical approach to measuring outcome	1999	Pubmed
Tobimatsu	The order of reacquirement of activity of daily living functions in people with spinal cord injury during rehabilitation after initial medical treatment and its affecting factors	2001	Pubmed
Lo	The outcome of tendon transfers for C6-spared quadriplegics	1998	Pubmed
Bossert	The paraplegic	1977	Pubmed
Fafara	The parents expectations after baclofen pump implantation in child with severe spasticity in physical rehabilitation and psychological aspects	2007	Pubmed
Mortifee	The performance of a limited set of items from the Functional Independence Measure for use in acute trauma care and rehabilitation	1996	Pubmed
Stiens	The person with a spinal cord injury: an evolving prototype for life care planning	2013	Pubmed
Monin	The personal importance of being independent: associations with changes in disability and depressive symptoms	2014	Pubmed
Washburn	The physical activity scale for individuals with physical disabilities: development and evaluation	2002	Pubmed
Lohne	The power of hope: patients' experiences of hope a year after acute spinal cord injury	2006	Pubmed
Polos	The power of nursing	1994	Pubmed
Gresham	The Quadriplegia Index of Function (QIF): sensitivity and reliability demonstrated in a study of thirty quadriplegic patients	1986	Pubmed
Ohry	The quadriplegic patient and his environment	1987	Pubmed
Siösteen	The quality of life of three functional spinal cord injury subgroups in a Swedish community	1990	Pubmed
Ballinger	The relation of shoulder pain and range-of-motion problems to functional limitations, disability, and perceived health of men with spinal cord injury: a multifaceted longitudinal study	2000	Pubmed
Majnemer	The relationship between manual ability and ambulation in adolescents with cerebral palsy	2013	Pubmed
Koeda	The relationship between severity of spastic diplegia and laterality of the cerebral function	1990	Pubmed
Chen	The relationship between sitting stability and functional performance in patients with paraplegia	2003	Pubmed
Flanders	The relationship between the functional abilities of patients with cervical spinal cord injury and the severity of damage revealed by MR imaging	1999	Pubmed
Bombardier	The relationship of age-related factors to psychological functioning among people with disabilities	2010	Pubmed
Raichle	The reliability and validity of pain interference measures in persons with spinal cord injury	2006	Pubmed
Hoenig	The reliability of a self-reported measure of disease, impairment, and function in persons with spinal cord dysfunction	1998	Pubmed
Neufeld	The 'risk inventory for persons with spinal cord injury': development and preliminary validation of a risk assessment tool for spinal cord injury	2010	Pubmed
Busnel	The robotized workstation "MASTER" for users with tetraplegia: description and evaluation	1999	Pubmed
Granat	The role of functional electrical stimulation in the rehabilitation of patients with incomplete spinal cord injury--observed benefits during gait studies	1993	Pubmed
Misra	The role of sensory and motor evoked potentials in the prognosis of Pott's paraplegia	2004	Pubmed
Forner-Cordero	The role of upper limb surgery in tetraplegia.	2003	Pubmed
Hammond	The SCIRehab project: social work and case management. Social work and case management treatment time during inpatient spinal cord injury rehabilitation	2011	Pubmed
Rundquist	The SCIRehab project: treatment time spent in SCI rehabilitation. Nursing bed sideeducation and care management time during inpatient spinal cord injuryrehabilitation.	2011	Pubmed
Rundquist	The SCIRehab project: treatment time spent in SCI rehabilitation. Nursing bedside education and care management time during inpatient spinal cord injury rehabilitation	2011	Pubmed
Foy	The SCIRehab project: treatment time spent in SCI rehabilitation. Occupational therapy treatment time during inpatient spinal cord injury rehabilitation	2011	Pubmed
Foy	The SCIRehab project: treatment time spent in SCI rehabilitation. Occupational therapy treatment time during inpatient spinal cord injury rehabilitation.	2011	Pubmed
Taylor-Schroeder	The SCIRehab project: treatment time spent in SCI rehabilitation. Physical therapy treatment time during inpatient spinal cord injury rehabilitation	2011	Pubmed
Gassaway	The SCIRehab project: treatment time spent in SCI rehabilitation. Therapeutic recreation treatment time during inpatient rehabilitation	2011	Pubmed
Gordon	The sensitivity and specificity of self-reported symptoms in individuals with traumatic brain injury.	2000	Pubmed
Gordon	The sensitivity and specificity of self-reported symptoms in individuals with traumatic brain injury.	2000	Pubmed
Post	The SIP68: a measure of health-related functional status in rehabilitation medicine	1996	Pubmed
McGarry	The Smart Wheelchair: is it an appropriate mobility training tool for children with physical disabilities?	2012	Pubmed
Taricco	The social and vocational outcome of spinal cord injury patients	1992	Pubmed
Blake	The social isolation of young men with quadriplegia	1995	Pubmed
Guittet	The Spartacus telethesis: manipulator control studies	1979	Pubmed
Harvey	The spinal cord independence measure	2015	Pubmed
Itzkovich	The Spinal Cord Independence Measure (SCIM) version III: reliability and validity in a multi-center international study.	2007	Pubmed
Catz	The spinal cord independence measure (SCIM): sensitivity to functional changes in subgroups of spinal cord lesion patients	2001	Pubmed
Mulcahey	The spinal cord independence measure (SCIM)-III self report for youth	2016	Pubmed
Scivoletto	The spinal cord independence measure: how much change is clinically significant for spinal cord injury subjects.	2013	Pubmed
Longmore	The strange death of David Rivlin	1991	Pubmed
Bérard	The technical aids of tetraplegic patients	1979	Pubmed
Sommer	The therapeutic challenges of dual diagnosis: TBI/SCI	2004	Pubmed
Heilporn	The therapeutic flat as a means of orientation and psychological adaptation for the paraplegic's environment	1986	Pubmed
Soberg	The trajectory of physical and mental health from injury to 5 years after multiple trauma: a prospective, longitudinal cohort study	2012	Pubmed
Graham	The Uniform Data System for Medical Rehabilitation: report of follow-up information on patients discharged from inpatient rehabilitation programs in 2002-2010	2014	Pubmed
Granger	The uniform data system for medical rehabilitation: report of patients with traumatic spinal cord injury discharged from rehabilitation programs in 2002-2010	2012	Pubmed
Landi	The upper limb in cerebral palsy: surgical management of shoulder and elbow deformities	2003	Pubmed
Rozin	The upper limb in spinal cord injury	1979	Pubmed
Scott	The use of bilateral stimulated hand grasp in the bimanual activities of persons with tetraplegia	2000	Pubmed
Kesiktas	The use of hydrotherapy for the management of spasticity	2004	Pubmed
Gibson	The use of standing frames for contracture management for nonmobile children with cerebral palsy	2009	Pubmed
Hoenig	The validity in persons with spinal cord injury of a self-reported functional measure derived from the functional independence measure	1999	Pubmed
Hunter	The validity of compliance monitors to assess wearing time of thoracic-lumbar-sacral orthoses in children with spinal cord injury	2008	Pubmed
Beckerman	The value of the Rehabilitation Activities Profile (RAP) as a quality sub-system in rehabilitation medicine	2004	Pubmed
Harvey	The walking index for spinal cord injury	2009	Pubmed
Pentland	The weight-bearing upper extremity in women with long term paraplegia	1991	Pubmed
Wolf	The World Health Organization Disability Assessment Scale, WHODAS II: reliability and validity in the measurement of activity and participation in a spinal cord injury population	2012	Pubmed
Guidetti	Therapeutic strategies used by occupational therapists in self-care training: a qualitative study	2002	Pubmed
Kagaya	Therapy and nursing of patients with cervical cord injuries. A conference. Psychological support of the patient in her social rehabilitation--a case of cervical cord injury with a smooth clinical course to recovery	1983	Pubmed
Rianne Ravensbergen	There an Association Between Markers of Cardiovascular Autonomic Dysfunction at Discharge From Rehabilitation and Participation 1 and 5 Years Later in Individuals With Spinal Cord Injury?	2016	Pubmed
Warms	There are a few things you did not ask about my pain: writing on the margins of a survey questionnaire	2005	Pubmed
Odderson	Thigh hematoma in the active and aging person with spinal cord injury.	1997	Pubmed
Cheville	Thyroid hormone changes in chronic spinal cord injury	1995	Pubmed
Hwang	Tibial somatosensory evoked potential can prognosticate for ambulatory function in subacute hemiplegic stroke	2016	Pubmed
Bohannon	Tilt table standing for reducing spasticity after spinal cord injury	1993	Pubmed
Chafetz	Timed motor test for wheelchair users: initial development and application in children with spinal cord injury	2004	Pubmed
Ibitoye	Torque and mechanomyogram relationships during electrically-evoked isometric quadriceps contractions in persons with spinal cord injury	2016	Pubmed
Hansen	Towards independence for paraplegics	1976	Pubmed
Ballert	Towards the development of clinical measures for spinal cord injury based on the International Classification of Functioning, Disability and Health with Rasch analyses	2014	Pubmed
Tian	Tracking functional status across the spinal cord injury lifespan: linking pediatric and adult patient-reported outcome scores	2014	Pubmed
El-Ghatit	Training apartment in community for spinal cord injured patients: a model	1980	Pubmed
Musselman	Training of walking skills overground and on the treadmill: case series on individuals with incomplete spinal cord injury	2009	Pubmed
Harvey	Training unsupported sitting does not improve ability to sit in people with recently acquired paraplegia: a randomised trial	2011	Pubmed
de Groot	Trajectories in the course of body mass index after spinal cord injury.	2014	Pubmed
Reft	Trajectories of target reaching arm movements in individuals with spinal cord injury: effect of external trunk support	2002	Pubmed
Yoon	Transcranial direct current stimulation to lessen neuropathic pain after spinal cord injury: a mechanistic PET study	2014	Pubmed
Mangold	Transcutaneous functional electrical stimulation for grasping in subjects with cervical spinal cord injury	2005	Pubmed
Koontz	Transfer component skill deficit rates among Veterans who use wheelchairs	2016	Pubmed
Gansel	Transfer of the pronator teres tendon to the tendons of the flexor digitorum profundus in tetraplegia	1990	Pubmed
Donkervoort	Transition to adulthood: validation of the Rotterdam Transition Profile for young adults with cerebral palsy and normal intelligence	2009	Pubmed
Kim	Transitioning teens with disabilities into adulthood	2010	Pubmed
Alimohammad	Translation and validation of the Farsi version of the Wheelchair Outcome Measure (WhOM-Farsi) in individuals with spinal cord injury	2016	Pubmed
Michailidou	Translation into Greek and initial validity and reliability testing of a modified version of the SCIM III, in both English and Greek, for self-use	2016	Pubmed
Davis	Translumbar amputation for nonneoplastic cause: rehabilitation and follow-up	1975	Pubmed
Miyamoto	Traumatic anterior atlantoaxial subluxation occurring in a professional rugby athlete: case report and review of literature related to atlantoaxial injuries in sports activities	2004	Pubmed
Roth	Traumatic central cord syndrome: clinical features and functional outcomes	1990	Pubmed
Roth	Traumatic cervical Brown-Sequard and Brown-Sequard-plus syndromes: the spectrum of presentations and outcomes	1991	Pubmed
McCourt	Traumatic complete quadriplegia	1977	Pubmed
Glaesener	Traumatic paraplegia with injury of the upper extremity--effects on the success of rehabilitation	1992	Pubmed
Rogers	Traumatic quadriplegia: follow-up study of self-care skills	1980	Pubmed
Kennedy	Traumatic spinal cord injury and psychological impact: a cross-sectional analysis of coping strategies	1995	Pubmed
Murphy	Traumatic spinal cord injury: an acute care rehabilitation perspective	1999	Pubmed
Gupta	Traumatic vs non-traumatic spinal cord lesions: comparison of neurological and functional outcome after in-patient rehabilitation	2008	Pubmed
Hicks	Treadmill training after spinal cord injury: it's not just about the walking	2008	Pubmed
Badke	Treatment and rehabilitation of post-traumatic tetraplegia in advanced age. A report of experiences	1997	Pubmed
Taylor	Treatment goals for quadriplegic and paraplegic patients	1974	Pubmed
Shaw	Treatment intervention: learning residents' rights	2014	Pubmed
Van Steen	Treatment of a patient with a complete C1 quadriplegia	1975	Pubmed
Dykstra	Treatment of detrusor-sphincter dyssynergia with botulinum A toxin: a double-blind study	1990	Pubmed
Seki	Treatment of pressure sores accompanied by infection in outpatients with spinal cord injury	2000	Pubmed
O'Brien	Treatment of spasticity with botulinum toxin	2002	Pubmed
Takeda	Treatment strategy of elderly rheumatoid arthritis	2016	Pubmed
Dijkers	Treatment taxonomy for rehabilitation: past, present, and prospects	2014	Pubmed
Gabison	Trunk strength and function using the multidirectional reach distance in individuals with non-traumatic spinal cord injury	2014	Pubmed
Huebner	Tub benches for people with spinal cord injury: luxury or necessity? Case Manager	2003	Pubmed
Huebner	Tub benches for people with spinal cord injury: luxury or necessity?	2003	Pubmed
Popović	Tuning of a nonanalytical hierarchical control system for reaching with FES	1998	Pubmed
Kesiktas	Turkish adaptation of Spinal Cord Independence Measure--version III	2012	Pubmed
Boles	Two technical aids for intermittent sterile catheterisation	1978	Pubmed
Perrier	Type, intensity and duration of daily physical activities performed by adults with spinal cord injury	2017	Pubmed
Widerström-Noga	Types and effectiveness of treatments used by people with chronic pain associated with spinal cord injuries: influence of pain and psychosocial characteristics	2003	Pubmed
Conwill	Understanding and combating helplessness	1993	Pubmed
Punj	Understanding and Overcoming Barriers to Upper Limb Surgical Reconstruction After Tetraplegia: The Need for Interdisciplinary Collaboration	2016	Pubmed
Stineman	Understanding non-performance reports for instrumental activity of daily living items in population analyses: a cross sectional study	2016	Pubmed
Brown	Unhandicapping the disabled: what is possible?	1987	Pubmed
Fiedler	Uniform data system for medical rehabilitation: report of first admissions for 1996	1998	Pubmed
Anderson	Unique management needs of pediatric spinal cord injury patients: psychosocial issues	1997	Pubmed
Anderson	United States (US) multi-center study to assess the validity and reliability of the Spinal Cord Independence Measure (SCIM III)	2011	Pubmed
Amtmann	University of Washington self-efficacy scale: a new self-efficacy scale for people with disabilities.	2012	Pubmed
Leemann	Unusually favorable recovery from locked-in syndrome after basilar artery occlusion	2010	Pubmed
Andrews	Update on distance and velocity requirements for community ambulation	2010	Pubmed
Andrews	Update on distance and velocity requirements for community ambulation.	2010	Pubmed
Takeshita	Updates on ossification of posterior longitudinal ligament. Symptoms in patients with ossification of posterior longitudinal ligament	2009	Pubmed
Billian	Upper extremity applications of functional neuromuscular stimulation	1992	Pubmed
Garber	Upper extremity assistive devices: assessment of use by spinal cord-injured patients with quadriplegia	1990	Pubmed
Rudhe	Upper extremity function in persons with tetraplegia: relationships between strength, capacity, and the spinal cord independence measure	2009	Pubmed
Petuskey	Upper extremity kinematics during functional activities: three-dimensional studies in a normal pediatric population	2007	Pubmed
Scott	Upper extremity neuroprostheses using functional electrical stimulation	1995	Pubmed
Sie	Upper extremity pain in the postrehabilitation spinal cord injured patient.	1992	Pubmed
Pentland	Upper limb function in persons with long term paraplegia and implications for independence: Part I	1994	Pubmed
Pentland	Upper limb function in persons with long term paraplegia and implications for independence: Part II	1994	Pubmed
Venugopalan	Upper limb functional electrical stimulation devices and their man-machine interfaces.	2015	Pubmed
Kankipati	Upper limb joint kinetics of three sitting pivot wheelchair transfer techniques in individuals with spinal cord injury	2015	Pubmed
Koontz	Upper limb kinetic analysis of three sitting pivot wheelchair transfer techniques	2011	Pubmed
Dimbwadyo-Terrer	Upper limb rehabilitation after spinal cord injury: a treatment based on a data glove and an immersive virtual reality environment	2016	Pubmed
Mohammed	Upper-limb surgery for tetraplegia	1992	Pubmed
Anderson	Urinary tract care: improvement through patient education	1983	Pubmed
Momose	Urological management of female spinal cord injury patients--clinical survey of 28 cases	1987	Pubmed
Jardón	Usability assessment of ASIBOT: a portable robot to aid patients with spinal cord injury	2011	Pubmed
Lim	Usability of a New Writing Assistive Device for Persons with Cervical Spinal Cord Injury.	2015	Pubmed
Almenara	Usability test of a hand exoskeleton for activities of daily living: an example of user-centered design	2017	Pubmed
Song	Usability test of KNRC self-feeding robot	2013	Pubmed
Kalpakjian	Use of a standardized menopause symptom rating scale in a sample of women with physical disabilities	2005	Pubmed
Pastor	Use of electrical stimulation and exercise to increase muscle strength in a patient after surgery for cervical spondylotic myelopathy	2010	Pubmed
Marvulli	Use Of External Intrathecal Infusion Pumps In The Management Of Septic Complications: A Case Report	2015	Pubmed
Kroll	Use of primary prevention services among male adults with cerebral palsy, multiple sclerosis, or spinal cord injury in managed care and fee-for-service	2004	Pubmed
Gefen	Use of shoulder flexors to achieve isometric elbow extension in C6 tetraplegic patients during weight shift.	1997	Pubmed
Watson	Use of standardized activities of daily living rating scales in spinal cord injury and disease services	1995	Pubmed
Forrest	Use of the Case Western Reserve/Veterans Administration neuroprosthesis for exercise, standing and transfers by a paraplegic subject	2012	Pubmed
Sinnott	Use of the ICF conceptual framework to interpret hand function outcomes following tendon transfer surgery for tetraplegia	2004	Pubmed
Cooper	Use of the Independence 3000 IBOT Transporter at home and in the community	2003	Pubmed
Cooper	Use of the INDEPENDENCE 3000 IBOT Transporter at home and in the community: a case report	2006	Pubmed
Snoek	Use of the NESS handmaster to restore handfunction in tetraplegia: clinical experiences in ten patients	2000	Pubmed
Meiners	Use of the ring fixator in the treatment of fractures of the lower extremity in long-term paraplegic and tetraplegic patients.	2003	Pubmed
Sale	Use of the robot assisted gait therapy in rehabilitation of patients with stroke and spinal cord injury	2012	Pubmed
Friesen	Use, performance and features of mobile shower commodes: perspectives of adults with spinal cord injury and expert clinicians	2015	Pubmed
Rauch	Using a case report of a patient with spinal cord injury to illustrate the application of the International Classification of Functioning, Disability and Health during multidisciplinary patient management.	2010	Pubmed
Kozlowski	Using individual growth curve models to predict recovery and activities of daily living after spinal cord injury: an SCIRehab project study	2013	Pubmed
Kozlowski	Using individual growth curve models to predict recovery and activities of daily living after spinal cord injury: an SCIRehab project study	2013	Pubmed
Cassidy	Using interpretative phenomenological analysis to inform physiotherapy practice: an introduction with reference to the lived experience of cerebellar ataxia	2011	Pubmed
Ljungberg	Using peer mentoring for people with spinal cord injury to enhance self-efficacy beliefs and prevent medical complications	2011	Pubmed
Anderle	Using personal assistance services after spinal cord injury: the role of the nurse.	1995	Pubmed
Pretz	Using Rasch motor FIM individual growth curves to inform clinical decisions for persons with paraplegia	2014	Pubmed
Bowman	Using the Americans With Disabilities Act of 1990 to empower university students with disabilities	1992	Pubmed
Michailidou	Using the Spinal Cord Independence Measure (SCIM III) by self-use	2016	Pubmed
Ackerman	Using the Spinal Cord Independence Measure III to measure functional recovery in a post-acute spinal cord injury program	2010	Pubmed
Scivoletto	Utility of delayed spinal cord injury rehabilitation: an Italian study.	2006	Pubmed
Misirlioglu	Validation of Duruöz Hand Index in patients with tetraplegia	2016	Pubmed
Riberto	Validation of the Brazilian version of the Spinal Cord Independence Measure III	2014	Pubmed
Bonavita	Validation of the Italian version of the Spinal Cord Independence Measure (SCIM III) Self-Report	2016	Pubmed
Fattal	Validation of the motor capacities scale: a specific evaluation of manual abilities in tetraplegics who undergo functional surgery of the upper limbs	2004	Pubmed
van den Berg-Emons	Validation of the Physical Activity Scale for individuals with physical disabilities	2011	Pubmed
Hitzig	Validation of the Reintegration to Normal Living Index for community-dwelling persons with chronic spinal cord injury	2012	Pubmed
Romero-Cullerés	Validation of the Spanish version of the King's Health questionnaire for evaluating quality of life related to urinary incontinence in patients with spinal cord injury	2011	Pubmed
King	Validity and reliability of the Short Form-36 in cervical spondylotic myelopathy	2002	Pubmed
Badía	Validity and reproducibility of the Spanish Version of the Sickness Impact Profile	1996	Pubmed
Johansson	Validity and responsiveness of the spinal cord index of function: an instrument on activity level	2009	Pubmed
Postma	Validity of the detection of wheelchair propulsion as measured with an Activity Monitor in patients with spinal cord injury	2005	Pubmed
Bombardier	Validity of the Patient Health Questionnaire-9 in assessing major depressive disorder during inpatient spinal cord injury rehabilitation	2012	Pubmed
Anderson	Vertebral fracture secondary to suicide attempt: demographics and patient outcome in a Scottish spinal rehabilitation unit	2011	Pubmed
Staros	Veterans Administration Prosthetics Center research report	1978	Pubmed
Sønksen	Vibratory ejaculation in 140 spinal cord injured men and home insemination of their partners	2012	Pubmed
Kizony	Video-capture virtual reality system for patients with paraplegic spinal cord injury.	2005	Pubmed
Alfred	Vocational development following severe spinal cord injury: a longitudinal study.	1987	Pubmed
Schönherr	Vocational perspectives after spinal cord injury	2005	Pubmed
Aach	Voluntary driven exoskeleton as a new tool for rehabilitation in chronic spinal cord injury: a pilot study	2014	Pubmed
Matjacić	Voluntary telemetry control of functional electrical stimulators	1996	Pubmed
Sturt	Walking ability at discharge from inpatient rehabilitation in a cohort of non-traumatic spinal cord injury patients	2009	Pubmed
Morganti	Walking index for spinal cord injury (WISCI): criterion validation.	2005	Pubmed
Franceschini	Walking performance: correlation between energy cost of walking and walking participation. new statistical approach concerning outcome measurement	2013	Pubmed
Reinders	Wear testing of moderate activities of daily living using in vivo measured knee joint loading	2015	Pubmed
Vlaeyen	What do chronic pain patients think of their pain? Towards a pain cognition questionnaire	1990	Pubmed
Botticello	What Extent Do Neighborhood Differences Mediate Racial Disparities in Participation After Spinal Cord Injury?	2016	Pubmed
Nechwatal	What happens to paraplegics? (AUTHOR'S TRANSL)	1975	Pubmed
Conway	What happens to people after malignant cord compression? Survival, function, quality of life, emotional well-being and place of care 1 month after diagnosis	2007	Pubmed
Meinecke	What has spinal stabilization contributed for the paraplegic patient?	1990	Pubmed
Kerstin	What promotes physical activity after spinal cord injury? An interview study from a patient perspective	2006	Pubmed
Kemp	What the rehabilitation professional and the consumer need to know	2005	Pubmed
Ekiz	Wheelchair appropriateness in patients with spinal cord injury: a Turkish experience	2014	Pubmed
Sabol	Wheelchair evaluation for the older adult	2006	Pubmed
Kirby	Wheelchair Skills Capacity and Performance of Manual Wheelchair Users With Spinal Cord Injury	2016	Pubmed
Fliess-Douer	Wheelchair skills performance between discharge and one year after inpatient rehabilitation in hand-rim wheelchair users with spinal cord injury.	2013	Pubmed
Sawatzky	Wheelchair skills training programme for children: a pilot study	2012	Pubmed
Ditunno	Who wants to walk? Preferences for recovery after SCI: a longitudinal and cross-sectional study	2008	Pubmed
Grice	Whole-arm tactile sensing for beneficial and acceptable contact during robotic assistance	2013	Pubmed
Fall	Wireless sEMG-Based Body-Machine Interface for Assistive Technology Devices	2017	Pubmed
Anderson	Work experience in adolescents with spinal cord injuries	2000	Pubmed
Valtonen	Work participation among persons with traumatic spinal cord injury and meningomyelocele1	2006	Pubmed
Valtonen	Work participation among persons with traumatic spinal cord injury and meningomyelocele1.	2006	Pubmed
McNeal	Work problems and accommodations reported by persons who are postpolio or have a spinal cord injury	1999	Pubmed
Fekete	Work stress and quality of life in persons with disabilities from four European countries: the case of spinal cord injury	2014	Pubmed
Fekete	Work stress and quality of life in persons with disabilities from four European countries: the case of spinal cord injury	2014	Pubmed
Taylor	Workstation robotics: a pilot study of a Desktop Vocational Assistant Robot.	1993	Pubmed
Thabet	Wrist fusion in patients with severe quadriplegic cerebral palsy.	2012	Pubmed
Marciello	Wrist strength measured by myometry as an indicator of functional independence	1995	Pubmed
Rühmann	Z-plasty and rerouting of the biceps tendon with interosseous membrane release to restore pronation in paralytic supination posture and contracture of the forearm	2009	Pubmed
Abraha	Thoracic stent graft versus surgery for thoracic aneurysm	2016	Cochrane
Abudou	Surgical versus non-surgical treatment for thoracolumbar burst fractures without neurological deficit	2013	Cochrane
Allen	The value of service dogs for people with severe ambulatory disabilities. A randomized controlled trial.	1996	Cochrane
Bagnall	Spinal fixation surgery for acute traumatic spinal cord injury	2008	Cochrane
Berlowitz	Respiratory muscle training for cervical spinal cord injury	2013	Cochrane
Boldt	Non-pharmacological interventions for chronic pain in people with spinal cord injury	2014	Cochrane
Bracken	Steroids for acute spinal cord injury	2012	Cochrane
Buchbinder	Percutaneous vertebroplasty for osteoporotic vertebral compression fracture	2015	Cochrane
Cheng	Pedicle screw fixation for traumatic fractures of the thoracic and lumbar spine	2013	Cochrane
Chinnock	Gangliosides for acute spinal cord injury	2005	Cochrane
Coggrave	Management of faecal incontinence and constipation in adults with central neurological diseases	2014	Cochrane
Curto	Surgical approaches for cervical spine facet dislocations in adults	2014	Cochrane
Davis	Physical fitness training for people with spinal cord injury	2017	Cochrane
deGroot	Effect of training intensity on physical capacity, lipid profile and insulin sensitivity in early rehabilitation of spinal cordinjured individuals.	2003	Cochrane
Duehmke	Tramadol for neuropathic pain in adults	2017	Cochrane
Dumville	Alginate dressings for treating pressure ulcers	2015	Cochrane
Dumville	Hydrogel dressings for treating pressure ulcers	2015	Cochrane
Dumville	Negative pressure wound therapy for treating pressure ulcers	2015	Cochrane
Eccleston	Psychological therapies for the management of chronic neuropathic pain in adults	2015	Cochrane
Geneen	Physical activity and exercise for chronic pain in adults: an overview of Cochrane Reviews	2017	Cochrane
George	Interventions for the treatment of metastatic extradural spinal cord compression in adults	2015	Cochrane
Gibson	Transcutaneous electrical nerve stimulation (TENS) for neuropathic pain in adults	2017	Cochrane
Guay	Neuraxial blockade for the prevention of postoperative mortality and major morbidity: an overview of Cochrane systematic reviews	2014	Cochrane
Gutiérrez	Physical therapy interventions for the prevention of fractures after spinal cord injury	2017	Cochrane
Hajibandeh	Neuromuscular electrical stimulation for the prevention of venous thromboembolism	2017	Cochrane
Hajibandeh	Revascularisation of the left subclavian artery for thoracic endovascular aortic repair	2016	Cochrane
Hao	Topical phenytoin for treating pressure ulcers	2017	Cochrane
Harvey	Stretch for the treatment and prevention of contractures	2017	Cochrane
He	Dexmedetomidine for the management of awake fibreoptic intubation	2014	Cochrane
Hsu	Distal aortic perfusion during thoracoabdominal aneurysm repair for prevention of paraplegia	2012	Cochrane
Jamison	Catheter policies for management of long term voiding problems in adults with neurogenic bladder disorders	2013	Cochrane
Jones	Spinal injuries centres (SICs) for acute traumatic spinal cord injury	2004	Cochrane
Khan	Cerebrospinal fluid drainage for thoracic and thoracoabdominal aortic aneurysm surgery	2012	Cochrane
Kreuter	Partner relationships, functioning, mood and global quality of life in persons with spinal cord injury and traumatic braininjury .	1998	Cochrane
Kwan	Spinal immobilisation for trauma patients	2001	Cochrane
Libin	Experiential learning approach to patient education : An SCI navigator study.	2013	Cochrane
Mathiowetz	One-year follow-up to a randomized controlled trial of an energy conservation course for persons with multiple sclerosis.	2007	Cochrane
Mehrholz	Locomotor training for walking after spinal cord injury	2012	Cochrane
Montenegro	Antiresorptive agents for the prevention of fractures after spinal cord injury	2013	Cochrane
Naing	Anabolic steroids for treating pressure ulcers	2017	Cochrane
Norman	Antibiotics and antiseptics for pressure ulcers	2016	Cochrane
Prabhu	Passive movements for the treatment and prevention of contractures	2013	Cochrane
Rice	Impact of the clinical practice guideline for preservation of upper limb function on transfer skills of persons with acute spinal cord injury .	2013	Cochrane		Duplicate
Rice	Improving transfer quality among persons living with tetraplegia	2014	Cochrane		Duplicate	Abstract only
Rose	Cough augmentation techniques for extubation or weaning critically ill patients from mechanical ventilation	2017	Cochrane
Sharma	Venous thromboembolism prophylaxis for acute spinal cord injury patients	2010	Cochrane
Shears	Surgical versus conservative management for odontoid fractures	2008	Cochrane
Simmons	Combined spinal-epidural versus epidural analgesia in labour	2012	Cochrane
Staal	Injection therapy for subacute and chronic low-back pain	2008	Cochrane
Taricco	Pharmacological interventions for spasticity following spinal cord injury	2000	Cochrane
Toh	Probiotics for preventing urinary tract infection in people with neuropathic bladder	2017	Cochrane
Utomo	Surgical management of functional bladder outlet obstruction in adults with neurogenic bladder dysfunction	2014	Cochrane
Walker	Foam dressings for treating pressure ulcers	2017	Cochrane
Westby	Dressings and topical agents for treating pressure ulcers	2017	Cochrane
Wiffen	Lamotrigine for chronic neuropathic pain and fibromyalgia in adults	2013	Cochrane
Wiffen	Levetiracetam for neuropathic pain in adults	2014	Cochrane
Yu-Wai-Man	Steroids for traumatic optic neuropathy	2013	Cochrane
Bonavita	Validation of the Italian version of the Spinal Cord Independence Measure (SCIM III) Self-Report	2016	Cinahl
Bispo	THE FEELINGS OF PARAPLEGIC CLIENTS WITH SPINAL CORD LESION AND THEIR CAREGIVERS: IMPLICATIONS TO THE NURSING CARE	2013	Cinahl
Aguiar	FUNCTIONAL ASSESSMENT OF PEOPLE WITH SPINAL CORD INJURY: USE OF THE FUNCTIONAL INDEPENDENCE MEASURE--FIM	2012	Cinahl
Kratz	Pain Acceptance Decouples the Momentary Associations Between Pain, Pain Interference, and Physical Activity in the Daily Lives of People With Chronic Pain and Spinal Cord Injury.	2017	Cinahl
Rohatinsky	Shifting the balance: conceptualising empowerment in individuals with spinal cord injury	2017	Cinahl
Kim	Evaluation of a self-efficacy enhancement program to prevent pressure ulcers in patients with a spinal cord injury	2017	Cinahl
Florio	Need and use of assistive devices for personal mobility by individuals with spinal cord injury	2016	Cinahl
Piatt	Examining How the Perception of Health Can Impact Participation and Autonomy Among Adults with Spinal Cord Injury.	2016	Cinahl
Verwer	Feasibility of an online well-being intervention for people with spinal cord injury: a pilot study	2016	Cinahl
Zlatev	How many spinal cord injury patients can catheterize their own bladder? The epidemiology of upper extremity function as it affects bladder management	2016	Cinahl
Reed	Impact of Health Behaviors and Health Management on Employment After SCI: Psychological Health and Health Management	2016	Cinahl
Forchheimer	Self-Report of Behaviors to Manaqe Neurogenic Bowel and Bladder by Individuals with Chronic Spinal Cord Injury: Frequency and Associated Outcomes	2016	Cinahl
Munce	Impact of psychological characteristics in self-management in individuals with traumatic spinal cord injury	2016	Cinahl
Meade	The Impact of Health Behaviors and Health Management on Employment After SCI: Physical Health and Functioning	2016	Cinahl
Padula	Long-term effects of an intensive interventional training program based on activities for individuals with spinal cord injury: a pilot study	2015	Cinahl
Houlihan	Randomized Trial of a Peer-Led, Telephone-Based Empowerment Intervention for Persons With Chronic Spinal Cord Injury Improves Health Self-Management	2017	Cinahl
Solanki	Effect of Body Weight Squatting on Functional Independence in the Individuals with Incomplete Spinal Cord Injury	2014	Cinahl
Cobb	An Exploratory Analysis of the Potential Association Between SCI Secondary Health Conditions and Daily Activities	2014	Cinahl
Kelly	Using intermittent self-catheters: experiences of people with neurological damage to their spinal cord	2014	Cinahl
Kriz	Intermittent self-catheterization in tetraplegic patients: a 6-year experience gained in the spinal cord unit in Prague	2014	Cinahl
Bravo-Esteban	Impact of specific symptoms of spasticity on voluntary lower limb muscle function, gait and daily activities during subacute and chronic spinal cord injury	2013	Cinahl
Shaw	Psychological coping with intermittent self-catheterisation (ISC) in people with spinal injury: A qualitative study	2013	Cinahl
Brawley	Developing Physical Activity Interventions for Adults With Spinal Cord Injury. Part 3: A Pilot Feasibility Study of an Intervention to Increase Self-Managed Physical Activity.	2013	Cinahl
Rice	Impact of the Clinical Practice Guideline for Preservation of Upper Limb Function on Transfer Skills of Persons With Acute Spinal Cord Injury	2013	Cinahl
Houlihan	“My Care My Call,” a Peer-Led, Telephone-based Intervention for Persons With Spinal Cord Injury Improves Self-Management Behaviors	2016	Cinahl
Coura	ASSOCIATIONS AMONG THE SOCIODEMOGRAPHIC FACTORS AND THE FUNCTIONAL CAPACITY OF PEOPLE WITH SPINAL CORD INJURY	2013	Cinahl
Walter	A database of self-reported secondary medical problems among VA spinal cord injury patients: its role in clinical care and management	2002	Cinahl
Fliess-Douer	Most Essential Wheeled Mobility Skills for Daily Life: An International Survey Among Paralympic Wheelchair Athletes With Spinal Cord Injury	2012	Cinahl
Kesiktas	Turkish adaptation of Spinal Cord Independence Measure - version III	2012	Cinahl
Robert	Chronic disease self-management for individuals with stroke, multiple sclerosis and spinal cord injury.	2011	Cinahl
Stenson	Obesity and Inpatient Rehabilitation Outcomes for Patients With a Traumatic Spinal Cord Injury	2011	Cinahl
Schladen	Toward literacy-neutral spinal cord injury information and training	2011	Cinahl
Van de Velde	Perceived participation, experiences from persons with spinal cord injury in their transition period from hospital to home	2010	Cinahl
Noonan	Comparing the reliability of five participation instruments in persons with spinal conditions	2010	Cinahl
Sagawa	Effects of wheelchair mass on the physiologic responses, perception of exertion, and performance during various simulated daily tasks	2010	Cinahl
Martin	Long-term follow-up of persons with spinal cord injury integrated in the community	2010	Cinahl
Johansson	Validity and responsiveness of the spinal cord index of function: an instrument on activity level	2009	Cinahl
Hetz	Increased participation in activities of daily living is associated with lower cholesterol levels in people with spinal cord injury	2009	Cinahl
van Langeveld	Reliability of a new classification system for mobility and self-care in spinal cord injury rehabilitation: the Spinal Cord Injury-Interventions Classification System	2010	Cinahl
Hetz	Activities of daily living performed by individuals with SCI: relationships with physical fitness and leisure time physical activity	2009	Cinahl
Guidetti	Meaning of Context in Recapturing Self-Care After Stroke or Spinal Cord Injury	2009	Cinahl
Molton	A preliminary evaluation of the motivational model of pain self-management in persons with spinal cord injury-related pain	2008	Cinahl
Morse	Association between mobility mode and C-reactive protein levels in men with chronic spinal cord injury	2008	Cinahl
Wirth	Changes in activity after a complete spinal cord injury as measured by the Spinal Cord Independence Measure II (SCIM II)	2008	Cinahl
Bryden	Assessing activity of daily living performance after implantation of an upper extremity neuroprosthesis	2008	Cinahl
van de Ven	Strategies for autonomy used by people with cervical spinal cord injury: a qualitative study	2008	Cinahl
Celik	Sex hormone levels and functional outcomes: a controlled study of patients with spinal cord injury compared with healthy subjects	2007	Cinahl
Dahlgren	Activity performance and upper extremity function in cervical spinal cord injury patients according to the Klein-Bell ADL Scale	2007	Cinahl
Murray	Impact of spinal cord injury on self-perceived pre- and postmorbid cognitive, emotional and physical functioning	2007	Cinahl
Jensen	Symptom burden in persons with spinal cord injury	2007	Cinahl
Guidetti	The lived experience of recapturing self-care	2007	Cinahl
Jain	Factors associated with health-related quality of life in chronic spinal cord injury	2007	Cinahl
Sprigle	Development of valid and reliable measures of postural stability	2007	Cinahl
Hsieh	A Rasch analysis of the Frenchay Activities Index in patients with spinal cord injury	2007	Cinahl
Lysack	Environmental factors and their role in community integration after spinal cord injury	2007	Cinahl
Spooren	Measuring change in arm hand skilled performance in persons with a cervical spinal cord injury: responsiveness of the Van Lieshout Test	2006	Cinahl
Lawton	Cross-cultural validity of FIM in spinal cord injury	2006	Cinahl
Sakellariou	Sexuality after spinal cord injury: the Greek male's perspective	2006	Cinahl
Bloemen-Vrencken	Health problems of persons with spinal cord injury living in the Netherlands	2005	Cinahl
Rigby	Impact of electronic aids to daily living on the lives of persons with cervical spinal cord injuries	2005	Cinahl
Grandas	Dyspnea during daily activities in chronic spinal cord injury	2005	Cinahl
Kirshblum	Late neurologic recovery after traumatic spinal cord injury.	2004	Cinahl
Liem	Aging with a spinal cord injury: factors associated with the need for more help with activities of daily living	2004	Cinahl
Donnelly	Client-centred assessment and the identification of meaningful treatment goals for individuals with a spinal cord injury.	2004	Cinahl
Wang	Functional ability, perceived exertion and employment of the individuals with spinal cord lesion in Taiwan	2002	Cinahl
Kozlowski	Using Individual Growth Curve Models to Predict Recovery and Activities of Daily Living After Spinal Cord Injury: An SCIRehab Project Study.	2013	Cinahl
Seekins	Secondary conditions experienced by adults with injury-related disabilities in Montana	2000	Cinahl
Prysak	Prevalence of secondary conditions in veterans with spinal cord injury and their interference with life activities.	2000	Cinahl
McColl	Expectations of health, independence, and quality of life among aging spinal cord-injured adults	1999	Cinahl
Thompson	Functional changes in persons aging with spinal cord injury.	1999	Cinahl
Dallmeijer	Physical performance in persons with spinal cord injuries after discharge from rehabilitation	1999	Cinahl
Mizuno	Twenty-seven years of complication-free life with clean intermittent self-catheterization in a patient with spinal cord injury: a case report.	2004	Cinahl
Hawkins	Substance abuse and medical complications following spinal cord injury	1998	Cinahl
Kirshblum	Bowel care practices in chronic spinal cord injury patients	1998	Cinahl
Levi	The Stockholm spinal cord injury study: 4. Psychosocial and financial issues of the Swedish annual level-of-living survey in SCI subjects and controls.	1996	Cinahl
Olinzock	A model for assessing learning readiness for self-direction of care in individuals with spinal cord injuries: a qualitative study	2004	Cinahl
van Oers	Reliability of heart rate responses to non-steady-state activities of daily living in men with spinal cord injuries	1994	Cinahl
Tate	Evaluation of a medical rehabilitation and independent living program for persons with spinal cord injury	1992	Cinahl
Krause	Mortality after spinal cord injury: a four-year prospective study	1992	Cinahl
Zbogar	Self-reported physical activity of individuals with SCI at admission and discharge from inpatient rehabilitation.	2012	Cinahl
[truncated: 96 more rows]

## Sheet: Records (duplication removal)
Author	Title	Year of publication	Database
Kuno	...and after the clinic? Reflections on domestic-familial rehabilitation and management of the spinal cord injured patient	1992	Pubmed
Houlihan	“My Care My Call,” a Peer-Led, Telephone-based Intervention for Persons With Spinal Cord Injury Improves Self-Management Behaviors	2016	Cinahl
Coe	22 years a tetraplegic	1982	Pubmed
Crevoisier	4/11. The paraplegic patient	2008	Pubmed
Ulin	A biomechanical analysis of methods used for transferring totally dependent patient	1997	Pubmed
Chung	A causal model of rehabilitation resource use for subjects with spinal cord injury in Taiwan	2003	Pubmed
Prentke	A chin switch for control of orthoses	1970	Pubmed
Middendorp	A clinical prediction rule for ambulation outcomes after traumatic spinal cord injury: a longitudinal cohort study.	2011	Ebsco
Yim	A comparison of bowel care patterns in patients with spinal cord injury: upper motor neuron bowel vs lower motor neuron bowel	2001	Pubmed
Bonaroti	A comparison of FES with KAFO for providing ambulation and upright mobility in a child with a complete thoracic spinal cord injury	1999	Pubmed
Harker	A comparison of independent living outcomes following traumatic brain injury and spinal cord injury	2002	Pubmed
Hughes	A comparison of spinergy versus standard steel-spoke wheelchair wheels	2005	Pubmed
Rades	A comparison of two different radiation schedules for metastatic spinal cord compression considering a new prognostic factor	2002	Pubmed
Yavuz	A comparison of two functional tests in quadriplegia: the quadriplegia index of function and the functional independence measure	1998	Pubmed
Sgouros	A critical appraisal of pediculated omental graft transposition in progressive spinal cord failure	1996	Pubmed
Walter	A database of self-reported secondary medical problems among VA spinal cord injury patients: its role in clinical care and management	2002	Cinahl
Perrier	A description and estimate of very low-intensity activity and inactive awake time in community-dwelling adults with chronic spinal cord injury	2016	Pubmed
Hokken	A dynamic pronation orthosis for the C6 tetraplegic arm.	1993	Pubmed
Boswell	A Falls Concern Scale for people with spinal cord injury (SCI-FCS)	2010	Pubmed
Prabhaka	A follow-up program in India for patients with spinal cord injury: paraplegia safari.	2004	Pubmed
Greene	A knee and ankle flexing hybrid orthosis for paraplegic ambulation	2003	Pubmed
Krause	A latent variable structural path model of health behaviors after spinal cord injury.	2009	Pubmed
Krause	A latent variable structural path model of health behaviors after spinal cord injury.	2009	Pubmed
Jones	A level of independence	1988	Pubmed
Saunders	A longitudinal study of depression in survivors of spinal cord injury	2012	Pubmed
Lambert	A lousy, rotten deal	1983	Pubmed
Stauffer	A master-plan for teaching the patient with spinal cord injury	1979	Pubmed
Soopramanien	A medico-social survey of Romanians with spinal cord injury	1995	Pubmed
Olinzock	A model for assessing learning readiness for self-direction of care in individuals with spinal cord injuries: a qualitative study	2004	Cinahl
Meyers	A model of outcomes research: spinal cord injury	2000	Pubmed
Nooijen	A more active lifestyle in persons with a recent spinal cord injury benefits physical fitness and health	2012	Pubmed
Catz	A multicenter international study on the Spinal Cord Independence Measure, version III: Rasch psychometric validation	2007	Pubmed
Cifu	A multicenter investigation of age-related differences in lengths of stay, hospitalization charges, and outcomes for a matched tetraplegia sample	1999	Pubmed
Pagliacci	A multicentre follow-up of clinical aspects of traumatic spinal cord injury.	2007	Pubmed
Kennedy	A multi-centre study of the community needs of people with spinal cord injuries: the first 18 months	2010	Pubmed
Audu	A neuroprosthesis for control of seated balance after spinal cord injury. J Neuroeng Rehabil	2015	Pubmed
Yu	A neuroprosthesis for high tetraplegia	2001	Pubmed
Adler	A new assistive device for intermittent self-catheterization in men with tetraplegia	2003	Pubmed
Lawlor	A new dynamic triceps-driven orthosis (DTDO): achieving elbow flexion in patients with C5 deficits	1998	Pubmed
Bluvshtein	A new grading for easy and concise description of functional status after spinal cord lesions.	2012	Pubmed
Roberts	A new life. Interview by Mary Hampshire.	1998	Pubmed
Kohlmeyer	A new orthosis for central cord syndrome and brachial plexus injuries	1990	Pubmed
Lude	A new, more creative approach is called for	2015	Pubmed
Thorsen	A noninvasive neuroprosthesis augments hand grasp force in individuals with cervical spinal cord injury: the functional and therapeutic effects	2013	Pubmed
Hohl	A novel classification system for traumatic central cord syndrome: the central cord injury scale (CCIS)	2010	Pubmed
Saunders	A novel method for testing learning and preferences in people with minimal motor movement	2005	Pubmed
Engstrand	A nursing challenge: effective patient education	1979	Pubmed
Urbano	A PC-based system for evaluating the efficacy of the NESS Handmaster orthosis	2003	Pubmed
Hogan	A personal view of independent living	1989	Pubmed
Oh	A Phase III Clinical Trial Showing Limited Efficacy of Autologous Mesenchymal Stem Cell Therapy for Spinal Cord Injury	2016	Pubmed
Lou	A pilot study to assess the relationships among coping, self-efficacy and functional improvement in men with paraplegia	1997	Pubmed
Molton	A preliminary evaluation of the motivational model of pain self-management in persons with spinal cord injury-related pain	2008	Cinahl
Sato	A preliminary study describing body position in daily life in children with severe cerebral palsy using a wearable device	2011	Pubmed
Douglas	A preschool severely disabled boy and his powered wheelchair: a case study	1987	Pubmed
Mulcahey	A prospective evaluation of upper extremity tendon transfers in children with cervical spinal cord injury	1999	Pubmed
van den Berg-Emons	A prospective study on physical activity levels after spinal cord injury during inpatient rehabilitation and the year after discharge	2008	Pubmed
Vilchis-Aranguren	A prospective, longitudinal, descriptive study of the effect of a customized wheelchair cushion on clinical variables, satisfaction, and functionality among patients with spinal cord injury.	2015	Pubmed
Berry	A psychometric analysis of the Needs Assessment Checklist (NAC)	2003	Pubmed
Crawford	A question of attitude	1992	Pubmed
Hsieh	A Rasch analysis of the Frenchay Activities Index in patients with spinal cord injury	2007	Pubmed
Mattson-Prince	A rational approach to long-term care: comparing the independent living model with agency-based care for persons with high spinal cord injuries	1997	Pubmed
Esclarín-De Ruz	A robotic system for gait re-education in patients with an incomplete spinal cord injury	2009	Pubmed
DeSanto-Madeya	A secondary analysis of the meaning of living with spinal cord injury using Roy's adaptation model	2006	Pubmed
Geis	A self care program for quadriplegic patients	1974	Pubmed
Boss	A self-care assessment tool (SCAT) for persons with a spinal cord injury: an expanded abstract	1996	Pubmed
Fridén	A single-stage operation for reconstruction of hand flexion, extension, and intrinsic function in tetraplegia: the alphabet procedure	2011	Pubmed
Symington	A study of functional independence in the quadriplegic patient	1966	Pubmed
Choi	A study of home care needs of patients at discharge and effects of home care--centered on patients discharged from a rural general hospital	1992	Pubmed
Jan	A survey of chronic pain in the pediatric spinal cord injury population	2004	Pubmed
Gay	A survey of problems of independence in paraplegics	1975	Pubmed
Velstra	A systematic literature review of outcome measures for upper extremity function using the international classification of functioning, disability, and health as reference	2011	Pubmed
Tsang	A systematic review and comparison of questionnaires in the management of spinal cord injury, multiple sclerosis and the neurogenic bladder.	2016	Pubmed
Fliess-Douer	A systematic review of wheelchair skills tests for manual wheelchair users with a spinal cord injury: towards a standardized outcome measure	2010	Pubmed
Dijkers	A tale of two countries: environmental impacts on social participation after spinal cord injury	2002	Pubmed
Bendixen	A telerehabilitation model for victims of polytrauma.	2008	Pubmed
Solyom	A treatment program for functional paraplegia/Munchausen syndrome	1990	Pubmed
Jang	A validity study of the WHOQOL-BREF assessment in persons with traumatic spinal cord injury	2004	Pubmed
Henshaw	ABC of spinal cord injury. Occupational therapy	1986	Pubmed
Kinnersly	ABC of spinal cord injury. Transfer of care from hospital to community	1986	Pubmed
van den Berg-Emons	Accelerometry-based activity spectrum in persons with chronic physical conditions	2010	Pubmed
Anderson	Acceptable benefits and risks associated with surgically improving arm function in individuals living with cervical spinal cord injury	2009	Pubmed
Kratz	Acceptance of pain in neurological disorders: associations with functioning and psychosocial well-being	2013	Pubmed
Kratz	Acceptance of pain in neurological disorders: Associations with functioning and psychosocial well-being.	2013	PsychInfo
Richards	Access to the environment and life satisfaction after spinal cord injury	1999	Pubmed
Inokuchi	Accidental falls	2013	Pubmed
Lim	Accommodating Autistics and Treating Autism: Can We Have Both? Bioethics.	2015	Pubmed
Boothe	Achieving normalcy following spinal cord injury	1999	Pubmed
Braun	Activation of paraplegic patients by functional electrical stimulation: training and biomechanical evaluation	1985	Pubmed
Garshick	Active Lifestyle Is Associated With Reduced Dyspnea and Greater Life Satisfaction in Spinal Cord Injury	2016	Pubmed
van der Woude	Active LifestyLe Rehabilitation interventions in aging spinal cord injury (ALLRISC): a multicentre research program.	2013	Pubmed
Jennifer	Active video game play in children with cerebral palsy: Potential for physical activity promotion and rehabilitation therapies	2012	EMBASE (elsevier)
Hetz	Activities of daily living performed by individuals with SCI: relationships with physical fitness and leisure time physical activity	2009	Pubmed
Hetz	Activities of daily living performed by individuals with SCI: relationships with physical fitness and leisure time physical activity	2009	Cinahl
Henriksen	Activities of daily living. Specialized care of the spinal cord injured patient	1976	Pubmed
Ullrich	Activity and participation after spinal cord injury: state-of-the-art report	2012	Pubmed
Wangdell	Activity gains after reconstructions of elbow extension in patients with tetraplegia.	2012	Pubmed
Stineman	Activity Limitation Stages empirically derived for Activities of Daily Living (ADL) and Instrumental ADL in the U.S. Adult community-dwelling Medicare population	2014	Pubmed
Halstead	Activity monitoring in chronic illness: time out of bed for tetraplegics during comprehensive rehabilitation	1978	Pubmed
Dahlgren	Activity performance and upper extremity function in cervical spinal cord injury patients according to the Klein-Bell ADL Scale	2007	Pubmed
Jones	Activity-based therapy for recovery of walking in individuals with chronic spinal cord injury: results from a randomized clinical trial	2014	Pubmed
Mitcho	Acute care management of spinal cord injuries	1999	Pubmed
Griffioen	Acute Pain Characteristics in Patients with and without Chronic Pain following Lower Extremity Injury	2017	EMBASE (elsevier)
Kalita	Acute pure motor quadriplegia: is it dengue myositis?	2005	Pubmed
Aguilar	Adaptation and validation of the Spanish self-report version of the Spinal Cord Independence Measure (SCIM III).	2015	Pubmed
Harel	Adaptation of computerized posturography to assess seated balance in persons with spinal cord injury	2013	Pubmed
Küçükdeveci	Adaptation of the modified Barthel Index for use in physical medicine and rehabilitation in Turkey	2000	Pubmed
Smith	Adapted bed controls and the quadriplegic patient	1978	Pubmed
Collins	Adapted plate for use in a microwave oven	1978	Pubmed
Wilson	Adapting "Portage" for neurological patients	1985	Pubmed
LoPresti	Adaptive software for head-operated computer controls	2004	Pubmed
Rodakowski	Additive effect of age on disability for individuals with spinal cord injuries.	2014	Pubmed
Webster	Addressing children's needs and evaluating rehabilitation outcome after spinal cord injury: the child needs assessment checklist and goal-planning program	2007	Pubmed
Qureshi	Adductor tenotomy and selective obturator neurectomy for the treatment of spasticity in a man with paraplegia	2013	Pubmed
Craig	Adjustment following chronic spinal cord injury: Determining factors that contribute to social participation	2015	Pubmed
Vogel	Adults with pediatric-onset spinal cord injuries: part 3: impact of medical complications.	2002	Pubmed
Jones	After Oswestry--what next?	1979	Pubmed
Putzke	Age and spinal cord injury: an emphasis on outcomes among the elderly.	2003	Pubmed
Molton	Age and the role of restricted activities in adjustment to disability-related pain.	2014	Pubmed
Penrod	Age effect on prognosis for functional recovery in acute, traumatic central cord syndrome	1990	Pubmed
Crewe	Ageing and severe physical disability: patterns of change and implications for services	1991	Pubmed
Weitzenkamp	Ageing with spinal cord injury: cross-sectional and longitudinal effects	2001	Pubmed
Seel	Age-related differences in length of stays, hospitalization costs, and outcomes for an injury-matched sample of adults with paraplegia	2001	Pubmed
Seel	Age-related differences in length of stays, hospitalization costs, and outcomes for an injury-matched sample of adults with paraplegia.	2001	Pubmed
Hinrichs	Age-related variation in mobility independence among wheelchair users with spinal cord injury: A cross-sectional study	2016	Pubmed
Kemp	Aging and spinal cord injury: medical, functional, and psychosocial changes	2002	Pubmed
Liem	Aging with a spinal cord injury: factors associated with the need for more help with activities of daily living	2004	Pubmed
Liem	Aging with a spinal cord injury: factors associated with the need for more help with activities of daily living	2004	Cinahl
Charlifue	Aging with spinal cord injury: changes in selected health indices and life satisfaction	2004	Pubmed
Lüthi	Aging with vitality	2015	Pubmed
McColl	Aging, spinal cord injury, and quality of life: structural relationships	2003	Pubmed
Barlow	Aids for the disabled: a measure of independence	1974	Pubmed
Kratz	Pain Acceptance Decouples the Momentary Associations Between Pain, Pain Interference, and Physical Activity in the Daily Lives of People With Chronic Pain and Spinal Cord Injury.	2017	Cinahl
Dumville	Alginate dressings for treating pressure ulcers	2015	Cochrane
Sasaki	Allodynia corresponding to the levels of cervical cord injury treated by surgical decompression: a report of 3 cases	2009	Pubmed
Yoo	Altered cardiovascular responses to tracheal intubation in patients with complete spinal cord injury: relation to time course and affected level.	2010	Ebsco
Hardin	Ambulation and spinal cord injury	2013	Pubmed
Díaz	Ambulation in patients with myelomeningocele: a study of 1500 patients	1993	Pubmed
Stauffer	Ambulation in thoracic paraplegia	1978	Pubmed
Hamon-Mekki	An "expanded" nurse-patient relationship guaranteed by experience and professionalism	2003	Pubmed
Shaddinger	An acute spinal cord injury: my family's story	1995	Pubmed
Bryden	An ADL measure for spinal cord injury	2011	Pubmed
Peckham	An advanced neuroprosthesis for restoration of hand and upper arm control using an implantable controller	2002	Pubmed
Matsumura	An approach in assisting a patient's recovery of independent actions. A lesson in interactions with a patient with a cervical spinal cord injury who was unwilling to accept rehabilitation therapy	1985	Pubmed
Kennedy	An audit of demographics and rehabilitation outcomes in non-traumatic spinal cord injury	2016	Pubmed
Prior	An electric wheelchair mounted robotic arm--a survey of potential users	1990	Pubmed
Saxena	An EMG-controlled grasping system for tetraplegics	1995	Pubmed
Smith	An enquiry into the use of financial compensation for severe injury	1990	Pubmed
The Rehabilitation R&D Evaluation Unit	An evaluation of capuchin monkeys trained to help severely disabled individuals	1991	Pubmed
McCormack	An exercise protocol for SCI	1977	Pubmed
Rottkamp	An experimental nursing study: a behavior modification approach to nursing therapeutics in body positioning of spinal cord-injured patients	1976	Pubmed
Cobb	An Exploratory Analysis of the Potential Association Between SCI Secondary Health Conditions and Daily Activities	2014	Cinahl
Andrade	An ICF-based approach for cerebral palsy from a biopsychosocial perspective	2012	Pubmed
Kilgore	An implanted myoelectrically-controlled neuroprosthesis for upper extremity function in spinal cord injury.	2006	Pubmed
Kilgore	An implanted upper-extremity neuroprosthesis using myoelectric control.	2008	Pubmed
Kilgore	An implanted upper-extremity neuroprosthesis. Follow-up of five patients.	1997	Pubmed
Vanacker	An individualized coaching program for patients with acute ischemic stroke: Feasibility study	2017	EMBASE (elsevier)
Perrier	An investigation of seasonal variation in leisure-time physical activity in persons with spinal cord injury	2012	Pubmed
Magora	An investigation of the problem of sick-leave in the patient suffering from low back pain	1969	Pubmed
Magora	An investigation of the problem of sick-leave in the patient suffering from low back pain.	1969	Pubmed
Lai	An Item Bank to Measure Systems, Services, and Policies: Environmental Factors Affecting People With Disabilities	2016	Pubmed
Naing	Anabolic steroids for treating pressure ulcers	2017	Cochrane
Kaji	Analysis and control of factors responsible for preventing social rehabilitation of patients with cervical cord injuries	1983	Pubmed
Meiners	Analysis of FIM-values during the hospital treatment of patients with acute spinal cord injury	2004	Pubmed
Hu	Analysis of functional status, quality of life and community integration in earthquake survivors with spinal cord injury at hospital discharge and one-year follow-up in the community	2012	Pubmed
Gagnon	Analysis of quality of life in patients with spinal cord injury: environmental and self esteem variables	1996	Pubmed
Theilig	András Petö conductive promotion	2004	Pubmed
Desachy	Animal therapy: current status and future	1996	Pubmed
Coignard	ANSO study: evaluation in an indoor environment of a mobile assistance robotic grasping arm.	2013	Pubmed
Ferch	Anterior correction of cervical kyphotic deformity: effects on myelopathy, neck pain, and sagittal alignment	2004	Pubmed
Anderson	Anterior decompression and arthrodesis of the cervical spine: long-term motor improvement. Part II--Improvement in complete traumatic quadriplegia	1992	Pubmed
Baba	Anterior decompressive surgery for cervical ossified posterior longitudinal ligament causing myeloradiculopathy	1995	Pubmed
Sakai	Anterior transvertebral herniotomy for cervical disc herniation: a long-term follow-up study	2009	Pubmed
Norman	Antibiotics and antiseptics for pressure ulcers	2016	Cochrane
Montenegro	Antiresorptive agents for the prevention of fractures after spinal cord injury	2013	Cochrane
Vall	Application of International Classification of Functioning, Disability and Health (ICF) in individuals with spinal cord injury	2011	Pubmed
Vall	Application of International Classification of Functioning, Disability and Health (ICF) in individuals with spinal cord injury.	2011	Pubmed
Hakenberg	Application of the Mitrofanoff principle for intermittent self-catheterization in quadriplegic patients	2001	Pubmed
Henderson	Application of ventilatory strategies to enhance functional activities for an individual with spinal cord injury	2005	Pubmed
Kadanka	Approaches to spondylotic cervical myelopathy: conservative versus surgical results in a 3-year follow-up study	2002	Pubmed
Ferrari	Artificial grasping system for the paralyzed hand	2000	Pubmed
Lalumiere	Ascending curbs of progressively higher height increases forward trunk flexion along with upper extremity mechanical and muscular demands in manual wheelchair users with a spinal cord injury	2013	Pubmed
Kozin	Ashworth S, Mulcahey MJ. Biceps-to-triceps transfer for elbow extension in persons with tetraplegia.	2010	Pubmed
van Middendorp	ASIA impairment scale conversion in traumatic SCI: is it related with the ability to walk? A descriptive comparison with functional ambulation outcome measures in 273 patients.	2009	Ebsco
Gärtner	Aspects of rehabilitation after early stabilization of complex injury of the cervical spine	1991	Pubmed
Nicklas	Aspects of the life situation of spinal cord injured persons – a socio-medical study of 246 persons with spinal cord injuries (author's transl)	1980	Pubmed
Bryden	Assessing activity of daily living performance after implantation of an upper extremity neuroprosthesis	2008	Cinahl
Tolerico	Assessing mobility characteristics and activity levels of manual wheelchair users	2007	Pubmed
Klaas	Assessing patterns of participation and enjoyment in children with spinal cord injury.	2010	Pubmed
Ravenek	Assessing quality of life in relation to physical activity participation in persons with spinal cord injury: a systematic review	2012	Pubmed
Chaves	Assessing the influence of wheelchair technology on perception of participation in spinal cord injury	2004	Pubmed
Begue-Simon	Assessment instruments used in rehabilitation	1989	Pubmed
Khenioui	Assessment of chronic pain as a disability in patients with spinal cord injuries	2006	Pubmed
Krause	Assessment of depressive symptoms during inpatient rehabilitation forspinal cord injury: Is there an underlying somatic factor when using the PHQ?	2008	PsychInfo
Dearwater	Assessment of physical activity in inactive populations	1985	Pubmed
Bourke-Taylor	Assessment of Unilateral Upper Limb Function: construct validity and correlation with the Pediatric Evaluation of Disability Inventory	2003	Pubmed
Shoji	Assistance for young paraplegic patients and the nursing personnel--with special reference to the psychological approach	1981	Pubmed
Shimoyama	Assistance of a patient with a cervical cord injury resisting the ADL training	1980	Pubmed
Allison	Assisted reach and transfers in individuals with tetraplegia: towards a solution.	1997	Pubmed
Linskell	Assisted-living spaces for end-users with complex needs: a proposed implementation and delivery model	2012	Pubmed
Bates	Assistive technology and the newly disabled adult: adaptation to wheelchair use.	1993	Pubmed
Friesen	Assistive technology devices for toileting and showering used in spinal cord injury rehabilitation - a comment on terminology	2016	Pubmed
Platts	Assistive technology in the rehabilitation of patients with high spinal cord lesions.	1993	Pubmed
Blair	Assistive technology: what and how for persons with spinal cord injury	2000	Pubmed
Morse	Association between mobility mode and C-reactive protein levels in men with chronic spinal cord injury	2008	Pubmed
Brotherton	Association between reliance on devices and people for walking and ability to walk community distances among persons with spinal cord injury.	2012	Pubmed
Cohen	Association between the functional independence measure following spinal cord injury and long-term outcomes	2012	Pubmed
Kalpakjian	Association of daily stressors and salivary cortisol in spinal cord injury.	2009	Pubmed
Krause	Association of mode of locomotion and independence in locomotion with long-term outcomes after spinal cord injury	2009	Pubmed
Eriks-Hoogland	Association of Shoulder Problems in Persons With Spinal Cord Injury at Discharge From Inpatient Rehabilitation With Activities and Participation 5 Years Later	2016	Pubmed
Kalpakjian	Association of daily stressors and salivary cortisol in spinal cord injury	2009	PsychInfo
Coura	ASSOCIATIONS AMONG THE SOCIODEMOGRAPHIC FACTORS AND THE FUNCTIONAL CAPACITY OF PEOPLE WITH SPINAL CORD INJURY	2013	Cinahl
Bourke	Attending to biographical disruption: the experience of rehabilitation following tetraplegia due to spinal cord injury	2015	Pubmed
Gannon	Attitudes toward disability and beliefs regarding support for a university student with quadriplegia	1996	Pubmed
Brown	Attribution of responsibility for injury and long-term outcome of patients with paralytic spinal cord trauma	1999	Pubmed
Gruskin	Auditory feedback device in a patient with left-sided neglect	1983	Pubmed
Carroll	Australian experience with the Freehand System for restoring grasp in quadriplegia	2000	Pubmed
Mackay-Sim	Autologous olfactory ensheathing cell transplantation in human paraplegia: a 3-year clinical trial	2008	Pubmed
Hou	Autonomic consequences of spinal cord injury	2014	Pubmed
Shepherd	Back to basics	1999	Pubmed
Lohne	Back to life again--patients' experiences of hope three to four years after a spinal cord injury--a longitudinal study	2009	Pubmed
Susan	Balance and ambulation improvements in individuals with chronic incomplete spinal cord injury using locomotor trainingbased rehabilitation	2012	EMBASE (elsevier)
Silver	Barriers for individuals with spinal cord injury returning to the community: a preliminary classification	2012	Pubmed
Vissers	Barriers to and facilitators of everyday physical activity in persons with a spinal cord injury after discharge from the rehabilitation centre	2008	Pubmed
Jaarsma	Barriers to and facilitators of sports participation for people with physical disabilities: a systematic review	2014	Pubmed
Tsai	Basic psychometric properties of the transfer assessment instrument (version 3.0)	2013	Pubmed
Höök	Bed hoist for tetraplegic patients	1970	Pubmed
Suzuki	Bedside nursing. Assistance for a patient with a spinal cord injury who has lost desire for social rehabilitation	1979	Pubmed
Rintala	Behavioral and demographic predictors of postdischarge outcomes in spinal cord injury	1987	Pubmed
Duman	Behcet's disease presenting with sudden-onset paraplegia due to anterior spinal artery involvement: 1-year follow-up of rehabilitation in conjunction with medication	2013	Pubmed
Steeves	Bench to bedside: challenges of clinical translation	2015	Pubmed
Li	Beneficial effects of the herbal medicine Di Huang Yin Zi in patients with spinal cord injury: a randomized, placebo-controlled clinical study	2012	Pubmed
Lu	Benefits of rehabilitation for traumatic spinal cord injury: a case report	1996	Pubmed
Stuifbergen	Benefits of wellness interventions for persons with chronic and disabling conditions: a review of the evidence	2010	Pubmed
Kuz	Biceps-to-triceps transfer in tetraplegic patients: report of the medial routing technique and follow-up of three cases	1999	Pubmed
Kozin	Bilateral biceps-to-triceps transfer to salvage failed bilateral deltoid-to-triceps transfer: a case report	2002	Pubmed
Dickson	Biographical disruption and the experience of loss following a spinal cord injury: an interpretative phenomenological analysis	2008	Pubmed
Ville	Biographical work and returning to employment following a spinal cord injury	2005	Pubmed
Granger	Biologic patterns of disability	2000	Pubmed
Hashizume	Biomechanics and Physiology for Propelling Wheelchair Uphill Slope	2015	Pubmed
Bauman	Blunted growth hormone response to intravenous arginine in subjects with a spinal cord injury	1994	Pubmed
Tomás	Body composition, muscle strength, functional capacity, and physical disability risk in liver transplanted familial amyloidotic polyneuropathy patients.	2011	Ebsco
Hatchett	Body mass index changes over 3 years and effect of obesity on community mobility for persons with chronic spinal cord injury. J Spinal Cord Med.	2016	Pubmed
Effing	Body weight-supported treadmill training in chronic incomplete spinal cord injury: a pilot study evaluating functional health status and quality of life	2006	Pubmed
Wessels	Body weight-supported gait training for restoration of walking in people with an incomplete spinal cord injury: a systematic review	2010	Pubmed
Geva-Dayan	Botulinum toxin injections for pediatric patients with hereditary spastic paraparesis	2010	Pubmed
Naicker	Botulinum toxin type A for rehabilitation after a spinal cord injury: a case report.	2009	Pubmed
Kirshblum	Bowel care practices in chronic spinal cord injury patients	1998	Pubmed
Lynch	Bowel dysfunction following spinal cord injury: a description of bowel function in a spinal cord-injured population and comparison with age and gender matched controls	2000	Pubmed
Waters	Brachioradialis to flexor pollicis longus tendon transfer for active lateral pinch in the tetraplegic	1985	Pubmed
Failla	Brachioradialis transfer for digital palsy	1990	Pubmed
Johnson	Brachioradialis transfer for wrist extension in tetraplegic patients who have fifth-cervical-level neurological function	1996	Pubmed
Chafetz	Bracing for success	2002	Pubmed
Wien	Breathlessness and exercise in spinal cord injury	1999	Pubmed
Wu	Brown-Sèquard syndrome caused by type III odontoid fracture: a case report and review of the literature	2010	Pubmed
Post	Burden of support for partners of persons with spinal cord injuries	2005	Pubmed
Clarke	Caloric costs of activity in paraplegic persons	1966	Pubmed
Halliday	Can functional electric stimulation-assisted rowing reproduce a race-winning rowing stroke?	2004	Pubmed
Whiting	Cannabinoids for Medical Use: A Systematic Review and Meta-analysis	2015	Pubmed
Hjeltnes	Capacity for physical work and training after spinal injuries and strokes	1982	Pubmed
Vavra-Hadziahmetović	Capacity of paraplegic individuals for activities of daily living	2002	Pubmed
Davis	Cardiorespiratory fitness and muscular strength of wheelchair users	1981	Pubmed
Yoo	Cardiovascular and arousal responses to laryngoscopy and tracheal intubation in patients with complete spinal cord injury.	2009	Ebsco
Kiyono	Car-driving abilities of people with tetraplegia.	2001	Pubmed
Kemp	Care and services for spinal injured people with, and without, neurological deficit	2002	Pubmed
Jensen	Care and teaching of a patient with cervical neck fracture. Teaching for increased abilities in self help	1981	Pubmed
Walther	Care for single paraplegics by conscentious objectors (author's transl)	1977	Pubmed
Kristel	Care of paraplegics. 3. Independence strengthens self reliance and self esteem	1998	Pubmed
Smith	Caregiving services in spinal cord injury: a systematic review of the literature	2016	Pubmed
Barabas	Care-load for children and young adults with severe cerebral palsy	1992	Pubmed
Gibson	Caring for a patient who lives with a spinal cord injury.	2003	Pubmed
Aljure	Carpal tunnel syndrome in paraplegic patients	1985	Pubmed
Gellman	Carpal tunnel syndrome in paraplegic patients	1988	Pubmed
Oesterling	Carpal tunnel syndrome: an occupational hazard for persons with paraplegia	1995	Pubmed
Winter	Case report: 122° kyphosis secondary to C5-L3 laminectomy and quadriplegia, surgical correction and 30-year follow-up	2011	Pubmed
Kurtz	Case study of an adolescent spinal cord injured patient	1993	Pubmed
Harr	Case study on effect of household task participation on home, community, and work opportunities for a youth with multiple disabilities	2011	Pubmed
Richardson	Catastrophizing, acceptance, and interference: Laboratory findings, subjective report, and pain willingness as a moderator	2010	PsychInfo
Richardson	Catastrophizing, acceptance, and interference: Laboratory findings, subjective report, and pain willingness as a moderator.	2010	PsychInfo
Jamison	Catheter policies for management of long term voiding problems in adults with neurogenic bladder disorders	2013	Cochrane
Nataraj	Center of mass acceleration feedback control of standing balance by functional neuromuscular stimulation against external postural perturbations	2013	Pubmed
Gillette	Center of pressure measures to assess standing performance	2002	Pubmed
Ina	Central cervical cord syndrome: a case report on rehabilitation, with special references to accidental falls in the elderly	1995	Pubmed
Dudas	Central cord injury: implications for nursing	1984	Pubmed
Wyndaele	Central nervous system tuberculosis reviewed	2015	Pubmed
Vall	Central neuropathic pain and its relation to the quality of life of a person with a traumatic spinal cord injury	2006	Pubmed
Khan	Cerebrospinal fluid drainage for thoracic and thoracoabdominal aortic aneurysm surgery	2012	Cochrane
Ross	Cervical cord compressive myelopathy in a man with a primary complaint of knee pain	2010	Pubmed
Murphy	Cervical fractures and spinal cord injury: outcome of surgical and nonsurgical management	1990	Pubmed
Marr	Cervical orthoses: the issue of patient compliance	1990	Pubmed
Roche	Cervical spinal cord trauma. Case reports	1975	Pubmed
Fielingsdorf	Cervical spine injury outcome--a review of 101 cases treated in a tertiary referral unit.	2007	Pubmed
Kadaňka	Cervical spondylotic myelopathy: conservative versus surgical treatment after 10 years	2011	Pubmed
Yamazaki	Cervical spondylotic myelopathy: surgical results and factors affecting outcome with special reference to age differences	2003	Pubmed
Sorsdahl	Change in basic motor abilities, quality of movement and everyday activities following intensive, goal-directed, activity-focused physiotherapy in a group setting for children with cerebral palsy	2010	Pubmed
Chen	Change in life satisfaction of adults with pediatric-onset spinal cord injury	2008	Pubmed
van Koppenhagen	Changes and determinants of life satisfaction after spinal cord injury: a cohort study in the Netherlands	2008	Pubmed
Wirth	Changes in activity after a complete spinal cord injury as measured by the Spinal Cord Independence Measure II (SCIM II)	2008	Cinahl
Wirth	Changes in activity after a complete spinal cord injury as measured by the Spinal Cord Independence Measure II (SCIM II).	2008	Pubmed
Zariffa	Changes in hand muscle synergies in subjects with spinal cord injury: characterization and functional implications	2012	Pubmed
Richardson	Changes in pain and quality of life in depressed individuals with spinal cord injury: does type of pain matter?	2016	Pubmed
Janssen	Changes in physical strain and physical capacity in men with spinal cord injuries	1996	Pubmed
Velstra	Changes in Strength, Sensation, and Prehension in Acute Cervical Spinal Cord Injury: European Multicenter Responsiveness Study of the GRASSP.	2015	Pubmed
McCaughey	Changing demographics of spinal cord injury over a 20-year period: a longitudinal population-based study in Scotland.	2016	Ebsco
van Boxel	Characteristics of patients from hospital-based in-patient rehabilitation in The Netherlands	1995	Pubmed
Hall	Characteristics of the Functional Independence Measure in traumatic spinal cord injury	1999	Pubmed
Mulcahey	Children's and parents' perspectives about activity performance and participation after spinal cord injury: initial development of a patient-reported outcome measure	2010	Pubmed
Mulcahey	Children's reports of activity and participation after sustaining a spinal cord injury: a cognitive interviewing study	2009	Pubmed
Robert	Chronic disease self-management for individuals with stroke, multiple sclerosis and spinal cord injury.	2011	Cinahl
Han	Chronic gastrointestinal problems and bowel dysfunction in patients with spinal cord injury	1998	Pubmed
Ordia	Chronic intrathecal delivery of baclofen by a programmable pump for the treatment of severe spasticity	1996	Pubmed
Goossens	Chronic neuropathic pain in spinal cord injury patients: what is the impact of social and environmental factors on care management?	2009	Pubmed
Modirian	Chronic pain after spinal cord injury: results of a long-term study	2010	Pubmed
Widerström-Noga	Chronic pain after spinal injury: interference with sleep and daily activities	2001	Pubmed
Widerström-Noga	Chronic pain and nonpainful sensations after spinal cord injury: is there a relation?	2003	Pubmed
Turner	Chronic pain associated with spinal cord injuries: a community survey	2001	Pubmed
Rintala	Chronic pain in a community-based sample of men with spinal cord injury: prevalence, severity, and relationship with impairment, disability, handicap, and subjective well-being	1998	Pubmed
Jensen	Chronic pain in individuals with spinal cord injury: a survey and longitudinal study	2005	Pubmed
Hjeltnes	Circulatory strain in everyday life of paraplegics	1979	Pubmed
Sutton	Clean intermittent self-catheterisation for quadriplegic patients--a five year follow-up.	1991	Pubmed
Joseph	Client Perspectives on Reclaiming Participation After a Traumatic Spinal Cord Injury in South Africa	2016	Pubmed
Donnelly	Client-centred assessment and the identification of meaningful treatment goals for individuals with a spinal cord injury	2004	Pubmed
Donnelly	Client-centred assessment and the identification of meaningful treatment goals for individuals with a spinal cord injury.	2004	Cinahl
Zörner	Clinical algorithm for improved prediction of ambulation and patient stratification after incomplete spinal cord injury	2010	Pubmed
Liu	Clinical analysis of the treatment of spinal cord injury with umbilical cord mesenchymal stem cells	2013	Pubmed
Thoumie	Clinical and functional evaluation of a gaze controlled system for the severely handicapped	1998	Pubmed
Rintala	Clinical application of longitudinal functional assessment	1980	Pubmed
Goad	Clinical application of the motor impairment concept	1983	Pubmed
Priebe	Clinical assessment of spasticity in spinal cord injury: a multidimensional problem	1996	Pubmed
Zeng	Clinical effect of methylprednisolone sodium succinate and mouse nerve growth factor for injection in treating acute spinal cord injury and cauda equina injury	2010	Pubmed
Hammel	Clinical evaluation of a desktop robotic assistant.	1989	Pubmed
Kato	Clinical evaluation of Luque's segmental spinal instrumentation for upper cervical metastases	2003	Pubmed
Popović	Clinical evaluation of the bionic glove	1999	Pubmed
Campos	Clinical evaluation of the effect of spinal cord stimulation on motor performance in patients with upper motor neuron lesions	1981	Pubmed
Liang	Clinical experience in rehabilitation of spinal cord injury associated with schizophrenia	1996	Pubmed
Shimada	Clinical experience of functional electrical stimulation in complete paraplegia	1996	Pubmed
Fyffe	Clinical interpretation of the Spinal Cord Injury Functional Index (SCI-FI)	2016	Pubmed
Tanaka	Clinical Prediction Rule for Declines in Activities of Daily Living at 6 Months After Surgery for Hip Fracture Repair	2016	EMBASE (elsevier)
Al-Habib	Clinical predictors of recovery after blunt spinal cord trauma: systematic review	2011	Pubmed
McKinley	Clinical presentations, medical complications, and functional outcomes of individuals with gunshot wound-induced spinal cord injury	1999	Pubmed
Gerner	Clinical rehabilitation of the spinal cord injury patient—is the Guttmann concept still valid?	1992	Pubmed
Yoshino	Clinical studies and postoperative results of 51 nonambulatory rheumatoid patients with total joint replacements	1985	Pubmed
Wong	Clinical trial of acupuncture for patients with spinal cord injuries	2003	Pubmed
Józefowski	Clinimetrical scales in spinal cord lesion	2013	Pubmed
Jegede	Cognitive performance in hypotensive persons with spinal cord injury	2010	Pubmed
Fowler	Collaborative efforts in achieving patient outcomes in central cord injury syndrome in the acute care setting	1995	Pubmed
Lynch	Colorectal motility and defecation after spinal cord injury in humans	2006	Pubmed
Boldt	Combined application of the International Classification of Functioning, Disability and Health and the NANDA-International Taxonomy II	2010	Pubmed
Nakashima	Combined posteroanterior surgery for osteoporotic delayed vertebral fracture and neural deficit in patients with Parkinson's disease	2009	Pubmed
Simmons	Combined spinal-epidural versus epidural analgesia in labour	2012	Cochrane
Gallagher	Combining Adult Learning Theory with Occupational Therapy Intervention for Bladder and Bowel Management after Spinal Cord Injury: A Case Report	2016	Pubmed
Goodman	Combining traditional physical therapy and karate in the treatment of a patient with quadriplegia	1980	Pubmed
Dinsdale	Community based monitoring for spinal man	1981	Pubmed
Anderson	Community integration among adults with spinal cord injuries sustained as children or adolescents	2003	Pubmed
Samuelkamaleshkumar	Community reintegration in rehabilitated South Indian persons with spinal cord injury	2010	Pubmed
Samuelkamaleshkumar	Community reintegration in rehabilitated South Indian persons with spinal cord injury.	2010	Pubmed
Samuelkamaleshkumar	Community reintegration in rehabilitated South Indian persons with spinal cord injury.	2010	Ebsco
Harrison	Community reintegration of SCI persons: problems and perceptions	1989	Pubmed
Sekaran	Community reintegration of spinal cord-injured patients in rural south India.	2010	Pubmed
Jovanović	Community-based study of health-related quality of life in spinal cord injury, muscular dystrophy, multiple sclerosis, and cerebral palsy	2012	Pubmed
Zhang	Comorbidity and the concentration of healthcare expenditures in older patients with heart failure	2003	Pubmed
Wimmer	Comparative evaluation of luque and isola instrumentation for treatment of neuromuscular scoliosis	2005	Pubmed
Singer	Comparative mortality in cerebral palsy patients in California, 1980-1996	1998	Pubmed
Riek	Comparative shoulder kinematics during free standing, standing depression lifts and daily functional activities in persons with paraplegia: considerations for shoulder health	2008	Pubmed
Agarwal	Comparative study of therapeutic response to baclofen vs tolperisone in spasticity	2017	Pubmed
van Langeveld	Comparing content of therapy for people with a spinal cord injury in postacute inpatient rehabilitation in Australia, Norway, and The Netherlands	2011	Pubmed
McCarthy	Comparing reliability and validity of pediatric instruments for measuring health and well-being of children with spastic cerebral palsy	2002	Pubmed
Noonan	Comparing the reliability of five participation instruments in persons with spinal conditions	2010	Pubmed
Noonan	Comparing the validity of five participation instruments in persons with spinal conditions	2010	Pubmed
Krause	Comparison of the Patient Health Questionnaire and the Older Adult Health and Mood Questionnaire for self-reported depressive symptoms after spinal cord injury	2009	Pubmed
Bednarczyk	Comparison of functional and medical assessment in the classification of persons with spinal cord injury	1993	Pubmed
Bonaroti	Comparison of functional electrical stimulation to long leg braces for upright mobility for children with complete thoracic level spinal injuries.	1999	Pubmed
Gagnon	Comparison of peak shoulder and elbow mechanical loads during weight-relief lifts and sitting pivot transfers among manual wheelchair users with spinal cord injury	2008	Pubmed
McKinley	Comparison of rehabilitation outcomes following vascular-related and traumatic spinal cord injury	2011	Pubmed
Turner-Stokes	Comparison of Rehabilitation Outcomes for Long Term Neurological Conditions: A Cohort Analysis of the Australian Rehabilitation Outcomes Centre Dataset for Adults of Working Age	2015	Pubmed
McCabe	Comparison of Robotics, Functional Electrical Stimulation, and Motor Learning Methods for Treatment of Persistent Upper Extremity Dysfunction After Stroke: A Randomized Controlled Trial	2015	EMBASE (elsevier)
Bogner	Comparison of scoring methods for the participation assessment with recombined tools-objective	2011	Pubmed
Anderson	Comparison of short-term SF-36 results between total joint arthroplasty and cervical spine decompression and fusion or arthroplasty	2009	Pubmed
Krause	Comparison of the Patient Health Questionnaire and the Older Adult Health and Mood Questionnaire for self-reported depressive symptoms after spinal cord injury.	2009	PsychInfo
van der Zee	Comparison of the Utrecht Scale for Evaluation of Rehabilitation-Participation with the ICF Measure of Participation and Activities Screener and the WHO Disability Assessment Schedule II in persons with spinal cord injury	2014	Pubmed
Aprile	Complex regional pain syndrome	1997	Pubmed
Yavuzer	Compliance with bladder management in spinal cord injury patients	2000	Pubmed
Chastin	Compliance with physical activity guidelines in a group of UK-based postal workers using an objective monitoring technique.	2009	Ebsco
Manns	Components of quality of life for persons with a quadriplegic and paraplegic spinal cord injury.	2001	Pubmed
Wirz	Concepts of aging with paralysis: implications for recovery and treatment	2012	Pubmed
Su	Concomitance of cervical intramedullary traumatic neuroma and cervical cord herniation in a tetraplegic woman	2013	Pubmed
Behari	Congenital reducible atlantoaxial dislocation: classification and surgical considerations	2002	Pubmed
Gilinsky	Considering power	2008	Pubmed
Brady	Constraint-induced movement therapy (CIMT): pediatric applications	2009	Pubmed
Taub	Constraint-Induced Movement Therapy: a new family of techniques with broad application to physical rehabilitation—a clinical review	1999	Pubmed
van Langeveld	Contents of physical therapy, occupational therapy, and sports therapy sessions for patients with a spinal cord injury in three Dutch rehabilitation centres	2011	Pubmed
Pazooki	Continent cutaneous urinary diversion in patients with spinal cord injury	2006	Pubmed
Albright	Continuous intrathecal baclofen infusion for spasticity of cerebral origin	1993	Pubmed
Moore	Coping and emotional attributions following spinal cord injury.	1994	Pubmed
Song	Coping strategies, physical function, and social adjustment in people with spinal cord injury.	2010	Pubmed
van Lankveld	Coping with spinal cord injury: tenacious goal pursuit and flexible goal adjustment.	2011	Pubmed
Fekete	Correlates and determinants of physical activity in persons with spinal cord injury: A review using the International Classification of Functioning, Disability and Health as reference framework	2012	Pubmed
Eriks-Hoogland	Correlation of shoulder range of motion limitations at discharge with limitations in activities and participation one year later in persons with spinal cord injury.	2011	Pubmed
Masala	Cost-effectiveness of percutaneous vertebroplasty in osteoporotic vertebral fractures	2008	Pubmed
Turner-Stokes	Cost-efficiency of specialist hyperacute in-patient rehabilitation services for medically unstable patients with complex rehabilitation needs: a prospective cohort analysis	2016	Pubmed
Turner-Stokes	Cost-efficiency of specialist inpatient rehabilitation for working-aged adults with complex neurological disabilities: a multicentre cohort analysis of a national clinical data set	2016	Pubmed
Rose	Cough augmentation techniques for extubation or weaning critically ill patients from mechanical ventilation	2017	Cochrane
Gunther	Countertransference issues in staff caregivers who work to rehabilitate catastrophic-injury survivors	1994	Pubmed
Becker-Casademont	Course and prognosis of the rehabilitation of patients following acute polyneuritis	1986	Pubmed
Behari	Craniocervical tuberculosis: protocol of surgical management	2003	Pubmed
Gibson	C-Reactive protein in adults with chronic spinal cord injury: increased chronic inflammation in tetraplegia vs paraplegia	2008	Pubmed
Fries	Critical rehabilitation of the patient with spinal cord injury	2005	Pubmed
Fattal	Critical review of the evaluation of the results of upper limb functional surgery in tetraplegia since 50 years	2004	Pubmed
McLaughlin	Critique of "Health Program Maintenance by Males with Spinal Cord Injury".	1976	Pubmed
Lawton	Cross-cultural validity of FIM in spinal cord injury	2006	Pubmed
Lundgren-Nilsson	Cross-diagnostic validity in a generic instrument: an example from the Functional Independence Measure in Scandinavia.	2006	Pubmed
Forchheimer	Cut point determination in the measurement of pain and its relationship to psychosocial and functional measures after traumatic spinal cord injury: a retrospective model spinal cord injury system analysis	2011	Pubmed
Yamasaki	Daily energy expenditure in active and inactive persons with spinal cord injury.	1992	Pubmed
Burke	Data on spinal injuries--Part II. Outcome of the treatment of 352 consecutive admissions	1985	Pubmed
Clark	Data-based models of how pressure ulcers develop in daily-living contexts of adults with spinal cord injury	2006	Pubmed
Dunn	Decision-Making About Upper Limb Tendon Transfer Surgery by People With Tetraplegia for More Than 10 Years	2016	Pubmed
Coupaud	Decreases in bone mineral density at cortical and trabecular sites in the tibia and femur during the first year of spinal cord injury.	2015	Ebsco
Dunkerley	Deltoid triceps transfer and functional independence of people with tetraplegia	2000	Pubmed
Hunt	Demographic and socioeconomic factors associated with disparity in wheelchair customizability among people with traumatic spinal cord injury	2004	Pubmed
Martinsen	Dependence on care experienced by people living with Duchenne muscular dystrophy and spinal cord injury	2012	Pubmed
Davidoff	Depression among acute spinal cord injury patients: A study utilizing the Zung Self-Rating Depression Scale.	1990	PsychInfo
MacDonald	Depression and activity patterns of spinal cord injured persons living in the community	1987	Pubmed
Tate	Depression and pain among inpatients with spinal cord injury and spinal cord disease: differences in symptoms and neurological function.	2013	Pubmed
Clair-Auger	Depression and recovery of reflex amplitude during electrical stimulation after spinal cord injury	2013	Pubmed
Clair-Auger	Depression and recovery of reflex amplitude during electrical stimulation afterspinal cord injury	2013	Pubmed
Fedoroff	Depression in patients with acute traumatic brain injury	1992	Pubmed
Geyh	Describing functioning and health after spinal cord injury in the light of psychological-personal factors	2016	Pubmed
Zanca	Describing what we do: a qualitative study of clinicians' perspectives on classifying rehabilitation interventions	2014	Pubmed
Kuipers	Descriptions of community by people with spinal cord injuries: concepts to inform community integration and community rehabilitation	2011	Pubmed
Washburn	Descriptive epidemiology of physical activity in university graduates with locomotor disabilities	1997	Pubmed
Oess	Design and evaluation of a low-cost instrumented glove for hand function assessment	2012	Pubmed
Harrow	Design and evaluation of a stand-up motorized prone cart.	2007	Pubmed
Malassigné	Design of the advanced commode-shower chair for spinal cord-injured individuals	2000	Pubmed
Lindsey	Designing patient education materials to increase independence	1995	Pubmed
Tederko	Determinants of health knowledge and health perceptions from the perspective of health-related education of patients with spinal cord injury: a systematic review	2017	Pubmed
Horn	Determinants of self-efficacy among persons with spinal cord injuries	1998	Pubmed
Tate	Determining differences in post discharge outcomes among catastrophically and noncatastrophically sponsored outpatients with spinal cord injury	1994	Pubmed
Lee	Determining metabolic equivalent values of physical activities for persons with paraplegia	2010	Pubmed
Manns	Determining the relation between quality of life, handicap, fitness, and physical activity for persons with spinal cord injury	1999	Pubmed
Slavin	Developing a contemporary functional outcome measure for spinal cord injury research.	2010	Pubmed
Chen	Developing an ICF core set for sub-acute stages of spinal cord injury in Taiwan: a preliminary study	2015	Pubmed
Belliveau	Developing Artificial Neural Network Models to Predict Functioning One Year After Traumatic Spinal Cord Injury	2016	Pubmed
Glazeroff	Developing direction on new streets: rehabilitating the street person	1978	Pubmed
Brawley	Developing Physical Activity Interventions for Adults With Spinal Cord Injury. Part 3: A Pilot Feasibility Study of an Intervention to Increase Self-Managed Physical Activity.	2013	Cinahl
Noreau	Development and assessment of a community follow-up questionnaire for the Rick Hansen spinal cord injury registry	2013	Pubmed
Jette	Development and initial evaluation of the spinal cord injury-functional index	2012	Pubmed
Fekete	Development and validation of a self-report version of the Spinal Cord Independence Measure (SCIM III).	2013	Pubmed
Post	Development and validation of IMPACT-S, an ICF-based questionnaire to measure activities and participation	2008	Pubmed
de Groot	Development and validation of prognostic models designed to predict wheelchair skills at discharge from spinal cord injury rehabilitation	2010	Pubmed
Invernizzi	Development and validation of the Italian version of the Spinal Cord Independence Measure III.	2010	Pubmed
van Langeveld	Development of a classification of physical, occupational, and sports therapy interventions to document mobility and self-care in spinal cord injury rehabilitation	2008	Pubmed
Pot	Development of a needs assessment system in rehabilitation	1999	Pubmed
Pot	Development of a needs assessment system in rehabilitation.	1999	Pubmed
Bieri	Development of a new assessment of effort and assistance in standing pivot transfers with functional electrical stimulation	2004	Pubmed
Fliess-Douer	Development of a new scale for perceived self-efficacy in manual wheeled mobility: a pilot study	2011	Pubmed
McDonough	Development of a self-report physical function instrument for disability assessment: item pool construction and factor analysis	2013	Pubmed
Marino	Development of a short-form Quadriplegia Index of Function scale	1999	Pubmed
Smith	Development of an upper extremity FES system for individuals with C4 tetraplegia	1996	Pubmed
Siegler	Development of complications during rehabilitation	1994	Pubmed
Koontz	Development of custom measurement system for biomechanical evaluation of independent wheelchair transfers	2011	Pubmed
Kalsi-Ryan	Development of the Graded Redefined Assessment of Strength, Sensibility and Prehension (GRASSP): reviewing measurement specific to the upper limb in tetraplegia	2012	Pubmed
Post	Development of the International Spinal Cord Injury Activities and Participation Basic Data Set	2016	Pubmed
Curtis	Development of the Wheelchair User's Shoulder Pain Index (WUSPI)	1995	Pubmed
Sprigle	Development of valid and reliable measures of postural stability	2007	Pubmed
Friesen	Development, construction, and content validation of a questionnaire to test mobile shower commode usability	2015	Pubmed
Wadhwa	Development, validity and reliability of the 'Sitting Balance Measure' (SBM) in spinal cord injury	2016	Pubmed
Majnemer	Developmental and functional abilities in children with cerebral palsy as related to pattern and level of motor function	2010	Pubmed
He	Dexmedetomidine for the management of awake fibreoptic intubation	2014	Cochrane
Botticello	Differences in the Community Built Environment Influence Poor Perceived Health Among Persons With Spinal Cord Injury	2015	Pubmed
Cruz-Almeida	Differentiation between pain-related interference and interference caused by the functional impairments of spinal cord injury	2009	Pubmed
Pouw	Diffusion-weighted MR imaging within 24 h post-injury after traumatic spinal cord injury: a qualitative meta-analysis between T2-weighted imaging and diffusion-weighted MR imaging in 18 patients.	2012	Ebsco
Hampton	Dimensions of quality of life for Chinese adults with spinal cord injury: a qualitative study	2004	Pubmed
Krause	Dimensions of subjective well-being after spinal cord injury: an empirical analysis by gender and race/ethnicity	1998	Pubmed
Ruff	Directed rehabilitation reduces pain and depression while increasing independence and satisfaction with life for patients with paraplegia due to epidural metastatic spinal cord compression	2007	Pubmed
Ville	Disability and a sense of community belonging. A study among tetraplegic spinal-cord-injured persons in France	2003	Pubmed
Botticello	Disability and the built environment: an investigation of community and neighborhood land uses and participation for physically impaired adults	2014	Pubmed
Hoenig	Disability fingerprints: patterns of disability in spinal cord injury and multiple sclerosis differ	1999	Pubmed
DeVivo	Discharge disposition from model spinal cord injury care system rehabilitation programs	1999	Pubmed
Hsu	Distal aortic perfusion during thoracoabdominal aneurysm repair for prevention of paraplegia	2012	Cochrane
Imms	Diversity of participation in children with cerebral palsy	2008	Pubmed
Bombardier	Do preinjury alcohol problems predict poorer rehabilitation progress in persons with spinal cord injury?	2004	Pubmed
Harvey	Does parent report measure performance? A study of the construct validity of the Functional Mobility Scale	2010	Pubmed
Gagnon	Does upper-limb muscular demand differ between preferred and nonpreferred sitting pivot transfer directions in individuals with a spinal cord injury?	2009	Pubmed
Escorpizo	Domain sets and measurement instruments on participation and environmental factors in spinal cord injury research	2011	Pubmed
Marino	Domains of outcomes in spinal cord injury for clinical trials to improve neurological function	2007	Pubmed
Anderson	Domain-specific satisfaction in adults with pediatric-onset spinal cord injuries	2003	Pubmed
Waters	Donal Munro Lecture: Functional and neurologic recovery following acute SCI.	1998	Pubmed
Hara	Dorsal wrist joint pain in tetraplegic patients during and after rehabilitation	2003	Pubmed
Westby	Dressings and topical agents for treating pressure ulcers	2017	Cochrane
Nelson	Durable medical equipment for children with spinal cord dysfunction: implications of age and level of injury	2007	Pubmed
Post	Dutch interview version of the Barthel Index evaluated in patients with spinal cord injuries	1995	Pubmed
Osterthun	Dutch-Flemish Spinal Cord Society. Characteristics, length of stay and functional outcome of patients with spinal cord injury in Dutch and Flemish rehabilitation centres.	2009	Pubmed
Osebold	Dynamics of hip joint remodeling after Chiari osteotomy. 10 patients with neuromuscular disease followed for 8 years	1997	Pubmed
Sisto	Dynamometry testing in spinal cord injury	2007	Pubmed
Grandas	Dyspnea during daily activities in chronic spinal cord injury	2005	Pubmed
Wangdell	Early Active Rehabilitation After Grip Reconstructive Surgery in Tetraplegia	2016	Pubmed
Kiwerski	Early anterior decompression and fusion for crush fractures of cervical vertebrae	1993	Pubmed
Saboe	Early predictors of functional independence 2 years after spinal cord injury	1997	Pubmed
Nemunaitis	Early Predictors of Functional Outcome After Trauma	2016	Pubmed
Sumida	Early rehabilitation effect for traumatic spinal cord injury	2001	Pubmed
Scivoletto	Early versus delayed inpatient spinal cord injury rehabilitation: an Italian study	2005	Pubmed
Mackelprang	Ecological factors in rehabilitation of patients with severe spinal cord injuries	1987	Pubmed
Bodner	Editors' note	2014	Pubmed
Brillhart	Education as the key to rehabilitation	1989	Pubmed
Brillhart	Education as the key to rehabilitation.	1989	Pubmed
Hart	Educational interests of individuals with spinal cord injury living in the community: medical, sexuality, and wellness topics	1996	Pubmed
Dudgeon	Educational participation of children with spinal cord injury	1997	Pubmed
Hart	Educational interests of individuals with spinal cord injury living in the community: medical, sexuality, and wellness topics.	1996	Pubmed
Wang	Effect on the activities of daily life of the patients with traumatic spinal cord injury treated by the paraplegia-triple-needling method	2012	Pubmed
Algood	Effect of a pushrim-activated power-assist wheelchair on the functional capabilities of persons with tetraplegia	2005	Pubmed
Logothetis	Effect of abiraterone acetate and prednisone compared with placebo and prednisone on pain control and skeletal-related events in patients with metastatic castration-resistant prostate cancer: exploratory analysis of data from the COU-AA-301 randomised trial	2012	Pubmed
Furusawa	Effect of age on bowel management in traumatic central cord syndrome	2012	Pubmed
DiCarlo	Effect of arm ergometry training on wheelchair propulsion endurance of individuals with quadriplegia	1988	Pubmed
Yang	Effect of backrest height on wheelchair propulsion biomechanics for level and uphill conditions	2011	Pubmed
Solanki	Effect of Body Weight Squatting on Functional Independence in the Individuals with Incomplete Spinal Cord Injury	2014	Cinahl
Tsuchiya	Effect of Dual Therapy with Botulinum Toxin A Injection and Electromyography-controlled Functional Electrical Stimulation on Active Function in the Spastic Paretic Hand	2016	Pubmed
Chih	Effect of exercise on physical function, daily living activities, and quality of life in the frail older adults: A meta-analysis	2012	EMBASE (elsevier)
Jung	Effect of pre-exercise carbohydrate ingestion on substrate consumption in persons with spinal cord injury	2009	Pubmed
Lamontagne	Effect of rehabilitation length of stay on outcomes in individuals with traumatic brain injury or spinal cord injury: a systematic review protocol	2013	Pubmed
Aissaoui	Effect of seat cushion on dynamic stability in sitting during a reaching task in wheelchair users with paraplegia	2001	Pubmed
Yang	Effect of selective posterior rhizotomy on transverse myelitis in a patient with systemic lupus erythematosus	2002	Pubmed
Blanchard-Dauphin	Effect of spasticity on functional capacity in spinal cord injuries: value of visual analogue scale (preliminary study)	2001	Pubmed
de Groot	Effect of training intensity on physical capacity, lipid profile and insulin sensitivity in early rehabilitation of spinal cord injured individuals	2003	Pubmed
de Groot	Effect of training intensity on physical capacity, lipid profile and insulin sensitivity in early rehabilitation of spinal cord injured individuals.	2003	Pubmed
Dallmeijer	Effect of training on physical capacity and physical strain in persons with tetraplegia	1997	Pubmed
Bussmann	Effect of wearing an activity monitor on the amount of daily manual wheelchair propulsion in persons with spinal cord injury	2010	Pubmed
deGroot	Effect of training intensity on physical capacity, lipid profile and insulin sensitivity in early rehabilitation of spinal cordinjured individuals.	2003	Cochrane
Liu	EFFECTIVENESS OF APONEUROSIS BRISEMEN FOR TREATMENT OF SPASTIC PALSY AFTER SPINAL CORD INJURY	2014	Pubmed
Wolf	Effectiveness of functional retraining for patients with quadriplegia	1971	Pubmed
Soler	Effectiveness of transcranial direct current stimulation and visual illusion on neuropathic pain in spinal cord injury	2010	Pubmed
Shiraishi	Effects of a Self-Exercise Program on Activities of Daily Living in Patients After Acute Stroke	2017	EMBASE (elsevier)
Williams	Effects of a static bicycling programme on the functional ability of young people with cerebral palsy who are non-ambulant	2007	Pubmed
Wilson	Effects of assistive technology on functional decline in people aging with a disability	2009	Pubmed
Nash	Effects of circuit resistance training on fitness attributes and upper-extremity pain in middle-aged men with paraplegia	2007	Pubmed
Sipski	Effects of gender on neurologic and functional recovery after spinal cord injury.	2004	Pubmed
Kay	Effects of gender on inpatient rehabilitation outcomes in the elderly with incomplete paraplegia from nontraumatic spinal cord injury	2010	Pubmed
Feng	Effects of hyperbaric oxygen therapy on depression and anxiety in the patients with incomplete spinal cord injury (a STROBE-compliant article)	2017	Pubmed
Wecht	Effects of midodrine and L-NAME on systemic and cerebral hemodynamics during cognitive activation in spinal cord injury and intact controls.	2016	Ebsco
Kemp	Effects of reduction in shoulder pain on quality of life and community activities among people living long-term with SCI paraplegia: a randomized control trial	2011	Pubmed
Lu	Effects of training on upper limb function after cervical spinal cord injury: a systematic review	2015	Pubmed
Devillard	Effects of training programs for spinal cord injury	2007	Pubmed
Sagawa	Effects of wheelchair mass on the physiologic responses, perception of exertion, and performance during various simulated daily tasks	2010	Pubmed
Nance	Efficacy and safety of tizanidine in the treatment of spasticity in patients with spinal cord injury. North American Tizanidine Study Group	1994	Pubmed
Peckham	Efficacy of an implanted neuroprosthesis for restoring hand grasp in tetraplegia: a multicenter study	2001	Pubmed
Chipman	Efficacy of dantrolene sodium in the treatment of spasticity	1974	Pubmed
Nakamura	Efficacy of traditional herbal medicine, Yokukansan on patients with neuropathic pain	2009	Pubmed
Ejeskär	Elbow extension	2002	Pubmed
Jaffe	Elective bilateral above the knee amputation in T4-complete spinal cord injury: a case report	2008	Pubmed
Kohlmeyer	Electrical stimulation and biofeedback effect on recovery of tenodesis grasp: a controlled study.	1996	Pubmed
Carroll	Electrical stimulation for restoring independent feeding in a man with quadriplegia.	1993	Pubmed
Gronley	Electromyographic and kinematic analysis of the shoulder during four activities of daily living in men with C6 tetraplegia	2000	Pubmed
Rigby	Electronic aids to daily living and quality of life for persons with tetraplegia.	2011	Pubmed
Verdonck	Electronic aids to daily living: be able to do what you want	2011	Pubmed
Efthimiou	Electronic assistive devices: their impact on the quality of life of high level quadriplegic persons	1981	Pubmed
Brudny	EMG feedback therapy: review of treatment of 114 patients	1976	Pubmed
Anderson	Employment outcomes of adults who sustained spinal cord injuries as children or adolescents	2002	Pubmed
Jakob	EM-SCI Study Group. Difficulty of elderly SCI subjects to translate motor recovery--"body function"--into daily living activities	2009	Pubmed
Lynch	Energy Cost of Lower Body Dressing, Pop-Over Transfers, and Manual Wheelchair Propulsion in People with Paraplegia Due to Motor-Complete Spinal Cord Injury.	2015	Pubmed
Collins	Energy cost of physical activities in persons with spinal cord injury	2010	Pubmed
Forrest	Energy cost of the case Western reserve standing neuroprosthesis.	2007	Pubmed
Tanhoffer	Energy expenditure in individuals with spinal cord injury quantified by doubly labeled water and a multi-sensor armband	2015	Pubmed
Merkel	Energy expenditure in patients with low-, mid-, or high-thoracic paraplegia using Scott-Craig knee-ankle-foot orthoses	1985	Pubmed
Cooper	Engineering better wheelchairs to enhance community participation	2006	Pubmed
Wangdell	Enhanced independence: experiences after regaining grip function in people with tetraplegia	2013	Pubmed
Chen	Enhancement of operational efficiencies for people with high cervical spinal cord injuries using a flexible integrated pointing device apparatus	2006	Pubmed
Forchheimer	Enhancing community re-integration following spinal cord injury	2004	Pubmed
Tsai	Environmental barriers and social participation in individuals with spinal cord injury.	2017	Pubmed
Hammel	Environmental barriers and supports to everyday participation: a qualitative insider perspective from people with disabilities	2015	Pubmed
Van Laere	Environmental control and social integration of a high-lesion tetraplegic patient: case report	1986	Pubmed
Woods	Environmental control systems in a spinal injuries unit: a review of 10 years' experience	1990	Pubmed
McDonald	Environmental control unit utilization by high-level spinal cord injured patients	1989	Pubmed
Lysack	Environmental factors and their role in community integration after spinal cord injury	2007	Pubmed
Whiteneck	Environmental factors and their role in participation and life satisfaction after spinal cord injury	2004	Pubmed
Smith	Equating rehabilitation outcome scales: developing common metrics	2004	Pubmed
Cowley	Equipment and modifications that enabled infant child-care by a mother with C8 tetraplegia: a case report	2007	Pubmed
McGee	Equipment and transfer techniques used by C6 quadriplegic patients	1977	Pubmed
Cardenas	Etiology and incidence of rehospitalization after traumatic spinal cord injury: a multicenter analysis	2004	Pubmed
Wirz	European Multicenter Study of Spinal Cord Injury (EMSCI) Network. Recovery of sensorimotor function and activities of daily living after cervical spinal cord injury: the influence of age	2015	Pubmed
Hartoonian	Evaluating a spinal cord injury-specific model of depression and quality of life.	2014	Pubmed
Freeman	Evaluating neurorehabilitation: lessons from routine data collection	2005	Pubmed
Whiteneck	Evaluating outcome after spinal cord injury: what determines success? 1996 Donald Munro Lecture	1997	Pubmed
Glaesener	Evaluating the independence of paraplegic patients at the end of the first rehabilitation--a multicenter project of computer-assisted quality control in rehabilitation	1992	Pubmed
Tate	Evaluation of a medical rehabilitation and independent living program for persons with spinal cord injury	1992	Cinahl
Cooper	Evaluation of a pushrim-activated, power-assisted wheelchair	2001	Pubmed
Kim	Evaluation of a self-efficacy enhancement program to prevent pressure ulcers in patients with a spinal cord injury	2017	Cinahl
Laffont	Evaluation of a stair-climbing power wheelchair in 25 people with tetraplegia	2008	Pubmed
Hammel	Evaluation of a vocational robot with a quadriplegic employee	1992	Pubmed
Maenner	Evaluation of an activities of daily living scale for adolescents and adults with developmental disabilities	2013	EMBASE (elsevier)
Pillastrini	Evaluation of an occupational therapy program for patients with spinal cord injury	2008	Pubmed
Edebol-Tysk	Evaluation of care-load for individuals with spastic tetraplegia	1989	Pubmed
Imamura	Evaluation of central paralysis	1997	Pubmed
Tsang	Evaluation of custom energy expenditure models for SenseWear armband in manual wheelchair users	2015	Pubmed
Ebrahimzadeh	Evaluation of disabilities and activities of daily living of war-related bilateral lower extremity amputees.	2016	Ebsco
Scranton	Evaluation of functional levels of patients during and following rehabilitation.	1970	Pubmed
Li	Evaluation of functional outcomes of physical rehabilitation and medical complications in spinal cord injury victims of the Sichuan earthquake	2012	Pubmed
Mulcahey	Evaluation of newly developed item banks for child-reported outcomes of participation following spinal cord injury	2012	Pubmed
Knox	Evaluation of the functional effects of a course of Bobath therapy in children with cerebral palsy: a preliminary study	2002	Pubmed
Calmels	Evaluation of the handicap and the quality of life in spinal cord injuries: study in a population of 58 patients living at home	2003	Pubmed
Karimi	Evaluation of the stability of normal subjects and patients with Perthes and spinal cord injury disorders during short and long periods of time	2013	Pubmed
Bérard	Evaluation of the treatments for the cerebral palsy child	2006	Pubmed
van Tuijl	Evaluation of upper extremity motor function tests in tetraplegics	2002	Pubmed
Solanki	Evaluation of volitional control of hand with vertical force assist device for high tetraplegia	2012	Pubmed
Ostensjø	Everyday functioning in young children with cerebral palsy: functional skills, caregiver assistance, and modifications of the environment	2003	Pubmed
Borloz	Evidence for validity and reliability of a French version of the FAAM.	2011	Ebsco
Zehr	Evidence-based risk assessment and recommendations for physical activity clearance: stroke and spinal cord injury	2011	Pubmed
Seki	Examination of living environment upon return to home for patients with cervical spinal cord injury--report of a case	2002	Pubmed
Piatt	Examining How the Perception of Health Can Impact Participation and Autonomy Among Adults with Spinal Cord Injury.	2016	Cinahl
McIntyre	Examining the effectiveness of intrathecal baclofen on spasticity in individuals with chronic spinal cord injury: a systematic review	2014	Pubmed
Rapport	Executive functioning and predictors of falls in the rehabilitation setting	1998	Pubmed
Martin Ginis	Exercise and sport for persons with spinal cord injury	2012	Pubmed
Barfield	Exercise Intensity During Power Wheelchair Soccer	2016	Pubmed
Nooijen	Exercise self-efficacy in persons with spinal cord injury: psychometric properties of the Dutch translation of the Exercise Self-Efficacy Scale	2013	Pubmed
Zwinkels	Exercise training programs to improve hand rim wheelchair propulsion capacity: a systematic review	2014	Pubmed
Allen-Wright	Expanding health promotion to individuals with spinal cord injuries	1999	Pubmed
McColl	Expectations of health, independence, and quality of life among aging spinal cord-injured adults	1999	Pubmed
Masini	Experience with a spinal cord unit in Brasilia, Brazil	1990	Pubmed
Dumrese	Experience with the orthotic provision of the quadraplegics (author's transl)	1974	Pubmed
Lundström	Experiences of participation in everyday occupations among persons aging with a tetraplegia	2015	Pubmed
Libin	Experiential learning approach to patient education : An SCI navigator study.	2013	Cochrane
Ballert	Explanatory power does not equal clinical importance: study of the use of the Brief ICF Core Sets for Spinal Cord Injury with a purely statistical approach.	2012	Pubmed
Tóth	Exploration of the goals for the quality of life in primary rehabilitation after spinal cord injury	2013	Pubmed
Rohde	Exploratory study of perceived quality of life with implanted standing neuroprostheses.	2012	Pubmed
Mortenson	Exploratory Validation of a Multidimensional Power Wheelchair Outcomes Toolkit	2015	Pubmed
Hammell	Exploring quality of life following high spinal cord injury: a review and critique.	2004	Pubmed
O'Connor	Exploring rating scale responsiveness: does the total score reflect the sum of its parts?	2004	Pubmed
Miyazaki	Extensive simultaneous multisegment laminectomy for myelopathy due to the ossification of the posterior longitudinal ligament in the cervical region	1986	Pubmed
Barclay	Facilitators and barriers to social and community participation following spinal cord injury	2016	Pubmed
King	Facing the future	1981	Pubmed
Bagley	Factor- and item-level analyses of the 38-item activities scale for kids-performance	2011	Pubmed
Richardson	Factor structure of the PHQ-9 screen for depression across time sinceinjury among persons with spinal cord injury.	2008	PsychInfo
Wee	Factors affecting measures of activities and participation in persons with mobility impairment	2009	Pubmed
Roehrig	Factors affecting shoulder pain in adolescents and young adults with spina bifida	2008	Pubmed
Kennedy	Factors associated with acute and chronic pain following traumatic spinal cord injuries	1997	Pubmed
Suriá Martínez	Factors associated with empowerment in people with a spinal cord injury due to traffic accidents	2015	Pubmed
Jain	Factors associated with health-related quality of life in chronic spinal cord injury	2007	Pubmed
Warren	Factors associated with life satisfaction among a sample of persons with neurotrauma	1996	Pubmed
Krause	Factors associated with risk for subsequent injuries after traumatic spinal cord injury	2004	Pubmed
Sinnott	Factors associated with thoracic spinal cord injury, lesion level and rotator cuff disorders	2000	Pubmed
Beck	Factors influencing functional outcome and discharge disposition after thoracic spinal cord injury	1999	Pubmed
Burnside	Factors influencing readmission to hospital. I. Tetraplegia	1976	Pubmed
George	Failure of methylprednisolone to improve the outcome of spinal cord injuries	1995	Pubmed
Siegrist	Fair opportunities, social productivity and wellbeing in disability: Towards a theoretical foundation	2016	Pubmed
Nelson	Fall-related fractures in persons with spinal cord impairment: a descriptive analysis	2003	Pubmed
Finlayson	Falls, aging, and disability	2010	Pubmed
Carnes	Family Adaptation to Brain Injury: Coping and Psychological Distress.	2005	PsychInfo
McGowan	Family functioning and functional independence in spinal cord injury adjustment	1987	Pubmed
Kapidzić-Duraković	Family participation in determination of FIM and Barthel indices.	2006	Pubmed
Kreuter	Family situation and psychosocial issues including problems that impact on partnership or resettlement in the home and into society.	1999	Pubmed
Barat	Fatigue after spinal cord injury	2006	Pubmed
Samaniego	Favorable outcome from a locked-in state despite extensive pontine infarction by MRI	2009	Pubmed
van Langeveld	Feasibility of a classification system for physical therapy, occupational therapy, and sports therapy interventions for mobility and self-care in spinal cord injury rehabilitation	2008	Pubmed
Verwer	Feasibility of an online well-being intervention for people with spinal cord injury: a pilot study	2016	Cinahl
Dahl	Feeding and nutritional characteristics in children with moderate or severe cerebral palsy	1996	Pubmed
Bobroff	Femoral anteversion and neck-shaft angle in children with cerebral palsy	1999	Pubmed
Newham	FES cycling. Acta Neurochir Suppl	2007	Pubmed
van Hedel	Fighting for each segment: estimating the clinical value of cervical and thoracic segments in SCI.	2006	Pubmed
Linacre	FIM levels as ordinal categories	2000	Pubmed
Middleton	Five additional mobility and locomotor items to improve responsiveness of the FIM in wheelchair-dependent individuals with spinal cord injury.	2006	Pubmed
Colyer	Flexor pollicis longus tenodesis in tetraplegia at the sixth cervical level. A prospective evaluation of functional gain	1981	Pubmed
Walker	Foam dressings for treating pressure ulcers	2017	Cochrane
Bloemen-Vrencken	Follow-up care for persons with spinal cord injury living in the community: a systematic review of interventions and their evaluation	2005	Pubmed
Franceschini	Follow-up in persons with traumatic spinal cord injury: questionnaire reliability	2006	Pubmed
Hallin	Follow-up of paraplegics and tetraplegics after comprehensive rehabilitation	1968	Pubmed
Exner	Follow-up of spinal injuries with transverse spinal cord lesion	1994	Pubmed
Hall	Follow-up study of individuals with high tetraplegia (C1-C4) 14 to 24 years postinjury	1999	Pubmed
Scovil	Follow-up study of spinal cord injured patients after discharge from inpatient rehabilitation in Nepal in 2007	2012	Pubmed
Allen	Follow-up study of wrist-driven flexor-hinge-splint use.	1971	Pubmed
Stucki	Four steps to follow when documenting functioning with the International Classification of Functioning, Disability and Health	2017	Pubmed
Albert	French Physical and Rehabilitation Medicine Society; French Federation of PRM. Physical and rehabilitation medicine (PRM) care pathways: "spinal cord injury".	2012	Pubmed
Brown	From contemporary rehabilitation to restorative neurology	2012	Pubmed
Wangdell	From regained function to daily use: experiences of surgical reconstruction of grip in people with tetraplegia	2014	Pubmed
McCormack	From the clinic: trapeze strap	1975	Pubmed
Rubinelli	From the person's perspective: Perceived problems in functioning among individuals with spinal cord injury in Switzerland	2016	Pubmed
Machado	Functional (in)dependence in the dependent relationship of quadriplegic men with their (un)replaceable parents/caregivers].	2010	Pubmed
Sinha	Functional ability level development and validation: providing clinical meaning for Spinal Cord Injury Functional Index scores	2015	Pubmed
Wang	Functional ability, perceived exertion and employment of the individuals with spinal cord lesion in Taiwan	2002	Pubmed
Symington	Functional achievement in a patient with C5—spared quadriparesis	1970	Pubmed
Dallolio	Functional and clinical outcomes of telemedicine in patients with spinal cord injury	2008	Pubmed
Johnstone	Functional and cosmetic outcome of surgery for cerebral palsy in the upper limb.	2003	Pubmed
Ota	Functional assessment of patients with spinal cord injury: measured by the motor score and the Functional Independence Measure.	1996	Pubmed
Aguiar	FUNCTIONAL ASSESSMENT OF PEOPLE WITH SPINAL CORD INJURY: USE OF THE FUNCTIONAL INDEPENDENCE MEASURE--FIM	2012	Cinahl
Sharif-Alhoseini	Functional assessment of SCI patients by FIM: yes or no?	2015	Pubmed
Yaşar	Functional assessment of SCI patients by FIM: yes or no?	2015	Pubmed
Hui	Functional assessment of the shoulder following latissimus dorsi muscle donation in the handicapped	1999	Pubmed
Thompson	Functional changes in persons aging with spinal cord injury	1999	Pubmed
Thompson	Functional changes in persons aging with spinal cord injury.	1999	Cinahl
Lapointe	Functional community ambulation requirements in incomplete spinal cord injured subjects	2001	Pubmed
Coura	Functional disability of adult individuals with spinal cord injury and its association with socio-demographic characteristics	2012	Pubmed
Schindler	Functional effect of bilateral tendon transfers on a person with C-5 quadriplegia	1994	Pubmed
Sipski	Functional electrical stimulation bicycle ergometry: patient perceptions	1989	Pubmed
Mayson	Functional electrical stimulation cycling in youth with spinal cord injury: A review of intervention studies	2014	Pubmed
Handa	Functional electrical stimulation for the control of the upper extremities	1987	Pubmed
Degnan	Functional electrical stimulation in tetraplegic patients to restore hand function	2002	Pubmed
Pfurtscheller	Functional electrical stimulation instead of surgery? Improvement of grasping function with FES in a patient with C5 tetraplegia	2005	Pubmed
Faghri	Functional electrical stimulation leg cycle ergometer exercise: training effects on cardiorespiratory responses of spinal cord injured subjects at rest and during submaximal exercise.	1992	Pubmed
Stanic	Functional electrical stimulation of abdominal muscles to augment tidal volume in spinal cord injury	2000	Pubmed
Thorsen	Functional electrical stimulation reinforced tenodesis effect controlled by myoelectric activity from wrist extensors	2006	Pubmed
Gschwind	Functional electrical stimulation: a new horizon for quadriplegic patients	2000	Pubmed
Freeman	Functional electrical stimulation: recent developments for the rehabilitation of spinal injured patients	1987	Pubmed
Popovic	Functional electrical therapy: retraining grasping in spinal cord injury	2006	Pubmed
Inmann	Functional evaluation of natural sensory feedback incorporated in a hand grasp neuroprosthesis	2004	Pubmed
Wijman	Functional evaluation of quadriplegic patients using a hand neuroprosthesis.	1990	Pubmed
Toh	Functional evaluation using motor scores after cervical spinal cord injuries.	1998	Pubmed
van Cooten	Functional hindrance due to spasticity in individuals with spinal cord injury during inpatient rehabilitation and 1 year thereafter	2015	Pubmed
Haisma	Functional independence and health-related functional status following spinal cord injury: a prospective study of the association with physical capacity	2008	Pubmed
Jongjit	Functional independence and rehabilitation outcome in traumatic spinal cord injury	2004	Pubmed
Dahlberg	Functional independence in persons with spinal cord injury in Helsinki	2003	Pubmed
Welch	Functional independence in quadriplegia: critical levels.	1986	Pubmed
Opara	Functional marker "Repty" for evaluation of independence in patients with paraplegia	1997	Pubmed
Mulcahey	Functional neuromuscular stimulation: outcomes in young people with tetraplegia	1994	Pubmed
Parke	Functional outcome after delivery of intrathecal baclofen	1989	Pubmed
Polinder	Functional outcome at 2.5, 5, 9, and 24 months after injury in the Netherlands	2007	Pubmed
Heinemann	Functional outcome following spinal cord injury. A comparison of specialized spinal cord injury center vs general hospital short-term care	1989	Pubmed
Curt	Functional outcome following spinal cord injury: significance of motor-evoked potentials and ASIA scores	1998	Pubmed
Di Scala	Functional outcome in children with traumatic brain injury. Agreement between clinical judgment and the functional independence measure	1992	Pubmed
Boviatsis	Functional outcome of intrathecal baclofen administration for severe spasticity	2005	Pubmed
Schönherr	Functional outcome of patients with spinal cord injury: rehabilitation outcome study	1999	Pubmed
Harvey	Functional outcomes attained by T9-12 paraplegic patients with the walkabout and the isocentric reciprocal gait orthoses	1997	Pubmed
Lo	Functional Priorities in Persons with Spinal Cord Injury: Using Discrete Choice Experiments To Determine Preferences	2016	Pubmed
Collinger	Functional priorities, assistive technology, and brain-computer interfaces after spinal cord injury	2013	Pubmed
Collinger	Functional priorities, assistive technology, and brain-computer interfaces afterspinal cord injury	2013	Pubmed
MacKenzie	Functional recovery and medical costs of trauma: an analysis by type and severity of injury	1988	Pubmed
Choksi	Functional recovery in children and adolescents with spinal cord injury	2010	Pubmed
Anderson	Functional Recovery Outcome Measures Work Group. Functional recovery measures for spinal cord injury: an evidence-based review for clinical practice and research.	2008	Pubmed
Hansen	Functional rehabilitation of the paraplegic	1977	Pubmed
Giuffrida	Functional restoration of elbow extension after spinal-cord injury using a neural network-based synergistic FES controller	2005	Pubmed
Velozo	Functional scale discrimination at admission and discharge: Rasch analysis of the Level of Rehabilitation Scale-III	1995	Pubmed
Pajareya	Functional skills after rehabilitation for patients with spinal cord injury.	1998	Pubmed
Dzidic	Functional skills after the rehabilitation of spinal cord injury patients; observation period of 3 years	1997	Pubmed
Taricco	Functional status in patients with spinal cord injury: a new standardized measurement scale. Gruppo Interdisciplinare Valutazione Interventi Riabilitativi	2000	Pubmed
Harada	Functional status outcomes in rehabilitation. Implications for prospective payment	1993	Pubmed
Ahl	Functional therapy for children with cerebral palsy: an ecological approach	2005	Pubmed
Bar-On	Functional, neurological and surgical aspects of the tetraplegic's hand	1993	Pubmed
Kuo	Functioning and disability analysis of patients with traumatic brain injury and spinal cord injury by using the world health organization disability assessment schedule 2.0.	2015	Pubmed
Kirchberger	Functioning and disability in spinal cord injury from the consumer perspective: an international qualitative study using focus groups and the ICF	2010	Pubmed
Graves	Gain in functional ability during medical rehabilitation as related to rehabilitation process indices and neurologic measures	1999	Pubmed
Freehafer	Gaining independence in tetraplegia. Cleveland technique	1998	Pubmed
van Hedel	Gait speed in relation to categories of functional ambulation after spinal cord injury	2009	Pubmed
Chinnock	Gangliosides for acute spinal cord injury	2005	Cochrane
Greenwald	Gender-related differences in acute rehabilitation lengths of stay, charges, and functional outcomes for a matched sample with spinal cord injury: a multicenter investigation	2001	Pubmed
Fitzharris	General health status and functional disability following injury in traffic crashes	2007	Pubmed
Simone	Generic ABILHAND questionnaire can measure manual ability across a variety of motor impairments	2011	Pubmed
Botticello	Geographic variation in participation for physically disabled adults: the contribution of area economic factors to employment after spinal cord injury	2012	Pubmed
van Drongelen	Glenohumeral contact forces and muscle forces evaluated in wheelchair-related activities of daily living in able-bodied subjects versus subjects with paraplegia and tetraplegia	2005	Pubmed
Raymond	Glucose tolerance and physical activity level in people with spinal cord injury.	2010	Pubmed
Fridén	Good possibilities of reconstructing grip function in tetraplegia. Care measures in a life-long patient perspective after cervical spinal cord injuries	2010	Pubmed
Shimada	Grasping power by means of functional electrical stimulation in a case of C6 complete tetraplegia	2003	Pubmed
Buchholz	Greater daily leisure time physical activity is associated with lower chronic disease risk in adults with spinal cord injury	2009	Pubmed
Dutton	Guidelines for using both activity and exercise	1989	Pubmed
Thibodaux	Habitus and the embodiment of disability through lifestyle	2005	Pubmed
Chodoroff	Hajdu-Cheney syndrome: rehabilitation after decompression of cervical spinal cord compromise	1984	Pubmed
Harvey	Hand function of C6 and C7 tetraplegics 1 - 16 years following injury.	2001	Pubmed
Bell	Hand skill measurement: a gauge for treatment.	1976	Pubmed
Pisotta	Hand-in-hand advances in biomedical engineering and sensorimotor restoration	2015	Pubmed
Stambrook	Head injury and spinal cord injury: differential effects on psychosocial functioning	1991	Pubmed
Kreuter	Health and quality of life of persons with spinal cord lesion in Australia and Sweden	2005	Pubmed
Reichard	Health disparities among adults with physical disabilities or cognitive limitations compared to individuals with no disabilities in the United States.	2011	Ebsco
Fernhall	Health implications of physical activity in individuals with spinal cord injury: a literature review	2008	Pubmed
Bloemen-Vrencken	Health problems of persons with spinal cord injury living in the Netherlands	2005	Pubmed
Getchel	Health program maintenance by males with spinal cord injury	1976	Pubmed
Whitehurst	Health state descriptions, valuations and individuals' capacity to walk: a comparative evaluation of preference-based instruments in the context of spinal cord injury	2016	Pubmed
Fjermestad	Health survey of adults with hereditary spastic paraparesis compared to population study controls	2016	Pubmed
Curtis	Health, vocational, and functional status in spinal cord injured athletes and nonathletes	1986	Pubmed
Njoki	Health-promotion needs of youth with a spinal cord injury in South Africa	2007	Pubmed
Dorsett	Health-related outcomes of people with spinal cord injury--a 10 year longitudinal study	2008	Pubmed
Saadat	Health-related quality of life among individuals with long-standing spinal cord injury: a comparative study of veterans and non-veterans	2010	Pubmed
Tapia	Health-related quality of life and economic impact of urinary incontinence due to detrusor overactivity associated with a neurologic condition: a systematic review	2013	Pubmed
Carlozzi	Health-related quality of life in caregivers of individuals with traumatic brain injury: development of a conceptual model	2015	Pubmed
Israeli-Mendlovic	Heart rate and heart rate variability parameters at rest, during activity and passive standing among children with cerebral palsy GMFCS IV-V.	2014	Pubmed
Hayes	Heart rate as a predictor of energy expenditure in people with spinal cord injury	2005	Pubmed
Moslavac	Hemodialysis-associated amyloidosis with cervical spinal cord compression and incomplete tetraplegia: a case report	2007	Pubmed
Gibson	Heterotopic ossification as a complication of toxic epidermal necrolysis	1997	Pubmed
Cipriano	Heterotopic ossification following traumatic brain injury and spinal cord injury	2009	Pubmed
Girard	High prevalence of nosocomial infections in rehabilitation units accounted for by urinary tract infections in patients with spinal cord injury	2006	Pubmed
Dieckmann	High-dose epinephrine in pediatric out-of-hospital cardiopulmonary arrest	1995	Pubmed
Collinger	High-performance neuroprosthetic control by an individual with tetraplegia	2013	Pubmed
Abel	Hindrance of spasticity after spinal cord injury	2015	Pubmed
Biering-Sørensen	Home aids and personal assistance 10-45 years after spinal cord injury	2009	Pubmed
Huml	Home environment clinic--transition from hospital to home	1986	Pubmed
Huml	Home environment clinic--transition from hospital to home.	1986	Pubmed
Storey	Home nursing care. III. Home care for the mobility disabled--a case study of a spinal cord injury client	1991	Pubmed
Moynahan	Home use of a functional electrical stimulation system for standing and mobility in adolescents with spinal cord injury	1996	Pubmed
Biniek	Home ventilation in neurologic diseases. Survey of 62 patients	1994	Pubmed
Kortte	Hope predicts positive functional role outcomes in acute rehabilitation populations.	2012	PsychInfo
Norin	Housing accessibility and its associations with participation among older adults living with long-standing spinal cord injury	2017	Pubmed
McNeese	Houston VA spinal cord injury program: initiating a spinal cord injury program.	1986	Pubmed
Grand	How an American plaintiff's lawyer presents the spinal cord injury resulting from trauma.	1977	Pubmed
Grossman	How can nurses use limit setting to facilitate spinal cord patients' independence?	1997	Pubmed
Côté-Leclerc	How does playing adapted sports affect quality of life of people with mobility limitations? Results from a mixed-method sequential explanatory study	2017	Pubmed
Zlatev	How many spinal cord injury patients can catheterize their own bladder? The epidemiology of upper extremity function as it affects bladder management	2016	Cinahl
Petrillo	How to equip the quadriplegic patient	1990	Pubmed
Dumville	Hydrogel dressings for treating pressure ulcers	2015	Cochrane
Aarabi	Hyperextension cervical spine injuries and traumatic central cord syndrome	2008	Pubmed
Kirchberger	Identification of the most common problems in functioning of individuals with spinal cord injury using the International Classification of Functioning, Disability and Health	2010	Pubmed
Williams	Identifying depression severity risk factors in persons with traumatic spinalcord injury.	2014	PsychInfo
Tsai	Immediate Biomechanical Implications of Transfer Component Skills Training on Independent Wheelchair Transfers	2016	Pubmed
Rice	Impact of a wheelchair education protocol based on practice guidelines for preservation of upper-limb function: a randomized trial	2014	Pubmed
Seguin	Impact of age on mortality in patients with acute traumatic spinal cord injury requiring intensive care	2012	Pubmed
Schenk-Rootlieb	Impact of cerebral visual impairment on the everyday life of cerebral palsied children	1993	Pubmed
Rigby	Impact of electronic aids to daily living on the lives of persons with cervical spinal cord injuries	2005	Pubmed
Rigby	Impact of electronic aids to daily living on the lives of persons with cervical spinal cord injuries	2005	Cinahl
Reed	Impact of Health Behaviors and Health Management on Employment After SCI: Psychological Health and Health Management	2016	Cinahl
van der Meer	Impact of health problems secondary to SCI one and five years after first inpatient rehabilitation	2017	Pubmed
Burnett	Impact of minority status following traumatic spinal cord injury	2002	Pubmed
Burnett	Impact of minority status following traumatic spinal cord injury.	2002	Pubmed
Mylotte	Impact of nosocomial infection on length of stay and functional improvement among patients admitted to an acute rehabilitation unit	2001	Pubmed
Sahlin	Impact of Organized Sports on Activity, Participation, and Quality of Life in People With Neurologic Disabilities	2015	Pubmed
Tlili	Impact of physical activity on the autonomy and the quality of life of patients with spinal cord injury	2008	Pubmed
Lala	Impact of pressure ulcers on individuals living with a spinal cord injury.	2014	Pubmed
Wang	Impact of pressure ulcers on outcomes in inpatient rehabilitation facilities	2014	Pubmed
Chafetz	Impact of prophylactic thoracolumbosacral orthosis bracing on functional activities and activities of daily living in the pediatric spinal cord injury population	2007	Pubmed
Munce	Impact of psychological characteristics in self-management in individuals with traumatic spinal cord injury	2016	Cinahl
Munce	Impact of quality improvement strategies on the quality of life and well-being of individuals with spinal cord injury: a systematic review protocol	2013	Pubmed
Munce	Impact of quality improvement strategies on the quality of life and well-being of individuals with spinal cord injury: a systematic review protocol	2013	Pubmed
Bravo-Esteban	Impact of specific symptoms of spasticity on voluntary lower limb muscle function, gait and daily activities during subacute and chronic spinal cord injury	2013	Cinahl
Bravo-Esteban	Impact of specific symptoms of spasticity on voluntary lower limb muscle function, gait and daily activities during subacute and chronic spinal cord injury.	2013	Pubmed
Murray	Impact of spinal cord injury on self-perceived pre- and postmorbid cognitive, emotional and physical functioning	2007	Pubmed
Rice	Impact of the clinical practice guideline for preservation of upper limb function on transfer skills of persons with acute spinal cord injury	2013	Pubmed
Lund	Impact on participation and autonomy questionnaire: internal scale validity of the Swedish version for use in people with spinal cord injury	2007	Pubmed
Rice	Impact of the clinical practice guideline for preservation of upper limb function on transfer skills of persons with acute spinal cord injury .	2013	Cochrane
Postma	Impaired respiratory function and associations with health-related quality of life in people with spinal cord injury	2016	Pubmed
Rodriguez	Impairment, disability, and handicap in multiple sclerosis: a population-based study in Olmsted County, Minnesota	1994	Pubmed
Keith	Implantable functional neuromuscular stimulation in the tetraplegic hand	1989	Pubmed
Mulcahey	Implantation of the Freehand System during initial rehabilitation using minimally invasive techniques	2004	Pubmed
Lam	Implantation of a breathing pacemaker in a tetraplegic patient in Hong Kong	2009	Pubmed
Triolo	Implanted electrical stimulation of the trunk for seated postural stability and function after cervical spinal cord injury: a single case study.	2009	Pubmed
Mulcahey	Implanted functional electrical stimulation hand system in adolescents with spinal injuries: an evaluation	1997	Pubmed
Memberg	Implanted neuroprosthesis for restoring arm and hand function in people with high level tetraplegia	2014	Pubmed
Inmann	Implementation of natural sensory feedback in a portable control system for a hand grasp neuroprosthesis	2004	Pubmed
Chen	Implementing technology-based embedded assessment in the home and community life of individuals aging with disabilities: a participatory research and development study	2014	Pubmed
Young	Implications of elbow arthrodesis for individuals with paraplegia	1993	Pubmed
Iezzoni	Implications of mobility impairment on the diagnosis and treatment of breast cancer	2011	Pubmed
Edwards	Importance of access to research information among individuals with spinal cord injury: results of an evidenced-based questionnaire	2002	Pubmed
Biering-Sørensen	Improved function of the hand in persons with tetraplegia using electric stimulation via implanted electrodes	2000	Pubmed
van Hedel	Improvement in function after spinal cord injury: the black-box entitled rehabilitation	2012	Pubmed
McCarty	Improvement of sleep apnea in a patient with cerebral palsy	2001	Pubmed
Spooren	Improvement of the Van Lieshout hand function test for tetraplegia using a Rasch analysis	2013	Pubmed
Meiners	Improvements in activities of daily living following functional hand surgery for treatment of lesions to the cervical spinal cord: self-assessment by patients.	2002	Pubmed
Williams	Improving measurement properties of the Patient Health Questionnaire–9 with rating scale analysis.	2009	PsychInfo
Rice	Improving transfer quality among persons living with tetraplegia	2014	Cochrane
Buccino	Improving upper limb motor functions through action observation treatment: a pilot study in children with cerebral palsy.	2012	Pubmed
Phonthee	Incidence and factors associated with falls in independent ambulatory individuals with spinal cord injury: a 6-month prospective study	2013	Pubmed
Lannem	Incomplete spinal cord injury, exercise and life satisfaction	2009	Pubmed
Shin	Increased cavernous expression of transforming growth factor-β1 and activation of the Smad signaling pathway affects erectile dysfunction in men with spinal cord injury.	2011	Ebsco
Hetz	Increased participation in activities of daily living is associated with lower cholesterol levels in people with spinal cord injury	2009	Pubmed
Hetz	Increased participation in activities of daily living is associated with lower cholesterol levels in people with spinal cord injury	2009	Cinahl
Frieden	Independence: the ultimate goal of rehabilitation for spinal cord-injured persons	1985	Pubmed
Barbonetti	Independent Association of Vitamin D With Physical Function in People With Chronic Spinal Cord Injury	2016	Pubmed
Weingarden	Independent dressing after spinal cord injury: a functional time evaluation	1989	Pubmed
Mattinson	Independent living for high-lesion quadriplegics	1987	Pubmed
Boschen	Independent living long-term outcome variables in spinal cord injury: a replication of DeJong	1998	Pubmed
DeJong	Independent living outcomes in spinal cord injury: multivariate analyses	1984	Pubmed
DeJong	Independent living: methodology for measuring long-term outcomes	1982	Pubmed
Khalifa	Inducing the quality of home health care theory through the use of grounded theory methodology	1993	Pubmed
Khalifa	Inducing the quality of home health care theory through the use of grounded theory methodology.	1993	Pubmed
Scivoletto	Inflammatory myelopathies and traumatic spinal cord lesions: comparison of functional and neurological outcomes	2008	Pubmed
Kiwerski	Influence of alcohol intake on the course and consequences of spinal cord injury	1992	Pubmed
Mingaila	Influence of complications on independence of patients with spinal cord injury in early rehabilitation	2005	Pubmed
Kloosterman	Influence of gravity compensation on kinematics and muscle activation patterns during reach and retrieval in subjects with cervical spinal cord injury: an explorative study	2010	Pubmed
Anneken	Influence of physical exercise on quality of life in individuals with spinal cord injury.	2010	Pubmed
Ribeiro	Influence of Relative Strength on Functional Independence of Patients With Spinal Cord Injury	2017	Pubmed
McVeigh	Influence of sport participation on community integration and quality of life: a comparison between sport participants and non-sport participants with spinal cord injury.	2009	Pubmed
Kowalczewski	In-home tele-rehabilitation improves tetraplegic hand function	2011	Pubmed
Daverat	Initial factors predicting functional performance in patients with traumatic tetraplegia	1990	Pubmed
Staal	Injection therapy for subacute and chronic low-back pain	2008	Cochrane
Saunders	Injuries and Falls in an Aging Cohort with Spinal Cord Injury: SCI Aging Study	2015	Pubmed
Lin	Injuries during a massive tug-of-war game	2003	Pubmed
Krause	Injury perceptions, hope for recovery, and psychological status after spinalcord injury.	2014	PsychInfo
Yoshikawa	Innovation in the training for preservation of the functions of the extremities in patients with cervical cord injuries	1983	Pubmed
Wijkstra	Inpatient chronic assisted ventilatory care: a 15-year experience	2003	Pubmed
Adamczyk	Input-output nonlinearities and time delays increase tracking errors in hand grasp neuroprostheses	1996	Pubmed
Chang	Institutional contexts contribute to the low priority given to developing self-care independence in a rehabilitation ward: a qualitative study	2013	Pubmed
Sato	Instruction and practice training of patients with cervical cord injuries for expansion of ADL	1983	Pubmed
Memberg	Instrumented objects for quantitative evaluation of hand grasp	1997	Pubmed
Zwick	Integrating Iyengar yoga into rehab for spinal cord injury	2006	Pubmed
Zwick	Integrating Iyengar yoga into rehab for spinal cord injury.	2006	Pubmed
Jacobs	Integrating the Americans With Disabilities Act of 1990 into client intervention	1992	Pubmed
Buck	Integration of patient exercise/physical therapy in the rehabilitation team	1992	Pubmed
Murai	Intensity modulated stereotactic body radiation therapy for single or multiple vertebral metastases with spinal cord compression	2014	Pubmed
Tang	Interactive development and evaluation of an independently accessible video education system for rehabilitation	1985	Pubmed
Putzke	Interference due to pain following spinal cord injury: important predictors and impact on quality of life	2002	Pubmed
Alander	Intermediate-term outcome of cervical spinal cord-injured patients older than 50 years of age.	1997	Pubmed
Kriz	Intermittent self-catheterization in tetraplegic patients: a 6-year experience gained in the spinal cord unit in Prague	2014	Cinahl
Steeves	International Campaign for Cures of Spinal Cord Injury Paralysis. Guidelines for the conduct of clinical trials for spinal cord injury (SCI) as developed by the ICCP panel: clinical trial outcome measures	2007	Pubmed
Li	International classification of functioning, disability and health categories for spinal cord injury nursing in China	2015	Pubmed
Fekete	International Spinal Cord Injury Community Survey (InSCI) group. A Structured Approach to Capture the Lived Experience of Spinal Cord Injury: Data Model and Questionnaire of the International Spinal Cord Injury Community Survey	2017	Pubmed
Biering	International spinal cord injury musculoskeletal basic data set	2012	Pubmed
Maynard	International Standards for Neurological and Functional Classification of Spinal Cord Injury.	1997	Pubmed
Yonenobu	Interobserver and intraobserver reliability of the japanese orthopaedic association scoring system for evaluation of cervical compression myelopathy	2001	Pubmed
Basso	Interrater reliability of the Neuromuscular Recovery Scale for spinal cord injury	2015	Pubmed
George	Interventions for the treatment of metastatic extradural spinal cord compression in adults	2015	Cochrane
Roberts	Interview by Craig Kenny	1998	Pubmed
Hocevar	Intestinal diversion (colostomy or ileostomy) in patients with severe bowel dysfunction following spinal cord injury	2008	Pubmed
Azouvi	Intrathecal baclofen administration for control of severe spinal spasticity: functional improvement and long-term follow-up	1996	Pubmed
Ueta	Intrathecal baclofen for severe spasticity	2008	Pubmed
Lewis	Intrathecal baclofen for severe spasticity secondary to spinal cord injury	1993	Pubmed
Penn	Intrathecal baclofen for severe spinal spasticity	1989	Pubmed
Savoy	Intrathecal baclofen infusion: an innovative approach for controlling spinal spasticity	1993	Pubmed
Armstrong	Intrathecally administered baclofen for treatment of children with spasticity of cerebral origin	1997	Pubmed
McCarthy	Intrinsic balancing in reconstruction of the tetraplegic hand	1997	Pubmed
Sweet	Investigating intermediary variables in the physical activity and quality of life relationship in persons with spinal cord injury	2013	Pubmed
Sweet	Investigating intermediary variables in the physical activity and quality of life relationship in persons with spinal cord injury.	2013	PsychInfo
de Groot	Investigation of bias due to loss of participants in a Dutch multicentre prospective spinal cord injury cohort study	2009	Pubmed
de Groot	Investigation of bias due to loss of participants in a Dutch multicentre prospective spinal cord injury cohort study.	2009	Pubmed
Koontz	Investigation of the performance of an ergonomic handrim as a pain-relieving intervention for manual wheelchair users	2006	Pubmed
Behrman	Invited commentary	2009	Pubmed
Norton	Is bed rest an effective treatment modality for pressure ulcers?	2004	Pubmed
van Middendorp	Is determination between complete and incomplete traumatic spinal cord injury clinically relevant? Validation of the ASIA sacral sparing criteria in a prospective cohort of 432 patients.	2009	Ebsco
Oe	Is extensive cervical laminoplasty an effective treatment for spinal cord sarcoidosis combined with cervical spondylosis?	2009	Pubmed
de Groot	Is manual wheelchair satisfaction related to active lifestyle and participation in people with a spinal cord injury?	2011	Pubmed
Pouw	Is the outcome in acute spinal cord ischaemia different from that in traumatic spinal cord injury? A cross-sectional analysis of the neurological and functional outcome in a cohort of 93 paraplegics.	2011	Ebsco
Piccardi	Is the patient able to watch TV or read the newspaper? A functional semi-structured scale to observe Hemineglect symptoms in Activities of Daily Living (H-ADL).	2016	Pubmed
Arora	Isolated involvement of the posterior elements in spinal tuberculosis: a review of twenty-four cases	2012	Pubmed
Sullivan	Isolated pelvic ring injuries: functional outcomes following percutaneous, posterior fixation	2015	Pubmed
Malassigné	Iterative design and evaluation of new prone carts for individuals with SCDs:a technical note	2002	Pubmed
Baranoski	Jill Kinmont Boothe: the obstacles and triumphs of living with an SCI	2000	Pubmed
Yarkony	Jones-Hedman walker modification for C7 quadriplegic patient: case study in team cooperation.	1986	Pubmed
Hirayama	Juvenile muscular atrophy of unilateral upper extremity (Hirayama disease)--half-century progress and establishment since its discovery	2008	Pubmed
de los Reyes-Guzmán	Kinematic analysis of the daily activity of drinking from a glass in a population with cervical spinal cord injury	2010	Pubmed
Venturini	Knowing the history and the life conditions of subjects with spinal cord lesions	2006	Pubmed
Venturini	Knowing the history and the life conditions of subjects with spinal cord lesions	2006	Pubmed
Lucke	Knowledge acquisition and decision-making: spinal cord injured individuals perceptions of caring during rehabilitation.	1997	Cinahl
Sietsma	Kyphoplasty as treatment for osteoporotic vertebral compression fractures: relatively safe, but still no evidence of functional improvement; a review of the literature	2008	Pubmed
Rowell	Labour market outcomes for people with a spinal cord injury	2010	Pubmed
Wiffen	Lamotrigine for chronic neuropathic pain and fibromyalgia in adults	2013	Cochrane
Kirshblum	Late neurologic recovery after traumatic spinal cord injury	2004	Pubmed
Kirshblum	Late neurologic recovery after traumatic spinal cord injury.	2004	Cinahl
Osborne	Learning from experience	1978	Pubmed
Marshall	Learning to live with paraplegia	1973	Pubmed
Nunnerley	Leaving a spinal unit and returning to the wider community: an interpretative phenomenological analysis	2013	Pubmed
Knight	Leisure-time physical activity and diet quality are not associated in people with chronic spinal cord injury	2011	Pubmed
Wiffen	Levetiracetam for neuropathic pain in adults	2014	Cochrane
Maric	Levodopa therapy in incomplete spinal cord injury	2008	Pubmed
Kelly	Life began at 55	1985	Pubmed
Strauss	Life expectancy of children with cerebral palsy	1998	Pubmed
Dunnum	Life satisfaction and spinal cord injury: the patient perspective	1990	Pubmed
Hicken	Life satisfaction following spinal cord and traumatic brain injury: a comparative study	2002	Pubmed
Anderson	Life satisfaction in adults with pediatric-onset spinal cord injuries	2002	Pubmed
Saikkonen	Life situation of spinal cord-injured persons in Central Finland	2004	Pubmed
Cooke	Life without limbs: Technology to the rescue	2016	Pubmed
Schopp	Life activities among individuals with spinal cord injury living in the community: Perceived choice and perceived barriers.	2007	PsychInfo
Ghaisas	Lifestyle changes and pressure ulcer prevention in adults with spinal cord injury in the pressure ulcer prevention study lifestyle intervention	2015	Pubmed
Morita	Lifestyle risk factors for pressure ulcers in community-based patients with spinal cord injuries in Japan	2015	Pubmed
Rohlmann	Lifting up and laying down a weight causes high spinal loads	2013	Pubmed
Kierney	Limb-salvage in reconstruction of recalcitrant pressure sores using the inferiorly based rectus abdominis myocutaneous flap	1998	Pubmed
Takeuchi	Limitation of activities of daily living accompanying reduced neck mobility after laminoplasty preserving or reattaching the semispinalis cervicis into axis	2008	Pubmed
Copes	Linking data from national trauma and rehabilitation registries	1996	Pubmed
Dahlgren	Linking the Klein-Bell Activities of Daily Living Scale to the International Classification of Functioning, Disability and Health	2013	Pubmed
Dallmeijer	Lipid, lipoprotein, and apolipoprotein profiles in active and sedentary men with tetraplegia	1997	Pubmed
Levack	Listen to the patient: quality of life of patients with recently diagnosed malignant cord compression in relation to their disability	2004	Pubmed
Frieden	Listening for footsteps	2002	Pubmed
Boothe	Living a full life with a spinal cord injury	2000	Pubmed
Sprigle	Load redistribution in variable position wheelchairs in people with spinal cord injury	2010	Pubmed
Casanova	Locked-in syndrome: improvement in the prognosis after an early intensive multidisciplinary rehabilitation	2003	Pubmed
Kiwerski	Locomotive capacity of patients with spinal cord injuries in the thoraco-lumbar segment	1985	Pubmed
Mehrholz	Locomotor training for walking after spinal cord injury	2012	Cochrane
Behrman	Locomotor training progression and outcomes after incomplete spinal cord injury	2005	Pubmed
Amsters	Long duration spinal cord injury: perceptions of functional change over time	2005	Pubmed
Zahavi	Long term effect (more than five years) of intrathecal baclofen on impairment, disability, and quality of life in patients with severe spasticity of spinal origin	2004	Pubmed
Kosma	Longitudinal changes in psychosocial constructs and physical activity among adults with physical disabilities	2012	EMBASE (elsevier)
Charlifue	Longitudinal outcomes in spinal cord injury: aging, secondary conditions, and well-being.	1999	Pubmed
Hiremath	Longitudinal Prediction of Quality-of-Life Scores and Locomotion in Individuals With Traumatic Spinal Cord Injury	2017	Pubmed
van Koppenhagen	Longitudinal relationship between wheelchair exercise capacity and life satisfaction in patients with spinal cord injury: A cohort study in the Netherlands	2014	Pubmed
Fekete	Longitudinal study of social participation and well-being among persons with spinal cord injury and their partners (pro-WELL)	2017	Pubmed
Halstead	Longitudinal unobtrusive measurements in rehabilitation.	1976	Pubmed
Jaspers Focks-Feenstra	Long-term patient satisfaction after reconstructive upper extremity surgery to improve arm-hand function in tetraplegia	2011	Pubmed
Boschen	Long-term adjustment and community reintegration following spinal cord injury.	2003	Pubmed
Hicks	Long-term body-weight-supported treadmill training and subsequent follow-up in persons with chronic SCI: effects on functional walking ability and measures of subjective well-being	2005	Pubmed
Li	Long-term care services needs for spinal-cord injury patients in Taiwan	2001	Pubmed
Poretti	Long-term complications and quality of life in children with intraspinal tumors	2008	Pubmed
Noreau	Long-term consequences of spinal cord injury on social participation: the occurrence of handicap situations.	2000	Pubmed
Padula	Long-term effects of an intensive interventional training program based on activities for individuals with spinal cord injury: a pilot study	2015	Pubmed
Martin	Long-term follow-up of persons with spinal cord injury integrated in the community	2010	Cinahl
Tasdemiroglu	Long-term follow-up results of thoracolumbar fractures after posterior instrumentation	1995	Pubmed
Dudley	Long-term functional benefits of selective dorsal rhizotomy for spastic cerebral palsy	2013	Pubmed
Vogel	Long-term outcomes and life satisfaction of adults who had pediatric spinal cord injuries	1998	Pubmed
Hwang	Long-Term Outcomes and Longitudinal Changes of Neurogenic Bowel Management in Adults With Pediatric-Onset Spinal Cord Injury	2017	Pubmed
Vogel	Long-term outcomes of adults with pediatric-onset spinal cord injuries as a function of neurological impairment	2011	Pubmed
Bozzacco	Long-term psychosocial effects of spinal cord injury.	1993	Pubmed
Batten	Long-term rehab. Improving quality of life	1999	Pubmed
Matsuyama	Long-term results of occipitothoracic fusion surgery in RA patients with destruction of the cervical spine	2005	Pubmed
Park	Long-term results of spinal cord injury therapy using mesenchymal stem cells derived from bone marrow in humans	2012	Pubmed
Gerhart	Long-term spinal cord injury: functional changes over time.	1993	Pubmed
Strauss	Long-term survival of children and adolescents after traumatic brain injury	1998	Pubmed
Agarwal	Long-term user perceptions of an implanted neuroprosthesis for exercise, standing, and transfers after spinal cord injury	2003	Pubmed
Schmeisser	Low cost assistive device systems for a high spinal-cord-injured person in the home environment--a technical note	1979	Pubmed
Barbonetti	Lower Vitamin D Levels Are Associated With Depression in People With Chronic Spinal Cord Injury	2017	Pubmed
Merli	Low-molecular-weight heparins versus unfractionated heparin in the treatment of deep vein thrombosis and pulmonary embolism	2000	Pubmed
Iwakiri	Lumbosacral reconstruction for intractable pyogenic spondylitis using a total leg flap with a vascularized tibia graft	2008	Pubmed
Mildenberger	Magnetic splint for object retrieval	1984	Pubmed
Christen	Maintaining hard won independence as long as possible	2015	Pubmed
Sgouros	Management and outcome of posttraumatic syringomyelia	1996	Pubmed
Cobb	Management of a paraplegic patient with a full thickness ischial pressure ulcer	2002	Pubmed
Ganguly	Management of chronic myelopathy symptoms and activities of daily living	2012	Pubmed
Coggrave	Management of faecal incontinence and constipation in adults with central neurological diseases	2014	Cochrane
Coggrave	Management of neurogenic bowel dysfunction in the community after spinal cord injury: a postal survey in the United Kingdom	2009	Pubmed
Richardson	Management of spasticity in hereditary spastic paraplegia	1999	Pubmed
Grosse	Management of the spinal cord injured patient--hospital routine or principles of comprehensive rehabilitation?].	1992	Pubmed
Sherman	Management of traumatic optic neuropathy with coexistent spinal cord injury: a case report	1997	Pubmed
Wirtz	Managing chronic spinal cord injury: issues in critical care.	1996	Pubmed
Grant	Managing the disabled at home	1972	Pubmed
Dudgeon	Managing usual and unexpected pain with physical disability: a qualitative analysis	2006	Pubmed
DeVivo	Marriage rates among persons with spinal cord injury.	1996	PsychInfo
Schopp	Masculine role variables and outcomes among men with spinal cord injury.	2007	Pubmed
Starck	Maslow's needs and the spinal cord injured client	1980	Pubmed
Hosack	Maximizing independent function	2010	Pubmed
Guidetti	Meaning of Context in Recapturing Self-Care After Stroke or Spinal Cord Injury	2009	Cinahl
Nilsson	Meanings of balance for people with long-term illnesses	2016	Pubmed
Packham	Measurement properties of painDETECT: Rasch analysis of responses from community-dwelling adults with neuropathic pain	2017	Pubmed
Chang	Measurement of motor conduction in the thoracolumbar cord. A possible predictor of surgical outcome in cervical spondylotic myelopathy	1996	Pubmed
Chang	Measurement properties of a modified measure of participation for persons with spinal cord injury	2016	Pubmed
Post	Measurement properties of the short version of the Van Lieshout test for arm/hand function of persons with tetraplegia after spinal cord injury	2006	Pubmed
Heinemann	Measurement properties of the Spinal Cord Injury-Functional Index (SCI-FI) short forms.	2014	Pubmed
Azaula	Measuring functional status and family support in older school-aged children with cerebral palsy: comparison of three instruments	2000	Pubmed
Hahn	Measuring Access to Information and Technology: Environmental Factors Affecting Persons With Neurologic Disorders	2016	Pubmed
Slavin	Measuring activity limitation outcomes in youth with spinal cord injury	2016	Pubmed
Dean	Measuring appraisals following acquired spinal cord injury: a preliminary psychometric analysis of the appraisals of disability	2009	Pubmed
Dean	Measuring appraisals following acquired spinal cord injury: A preliminary psychometric analysis of the appraisals of disability.	2009	PsychInfo
Spooren	Measuring change in arm hand skilled performance in persons with a cervical spinal cord injury: responsiveness of the Van Lieshout Test	2006	Pubmed
Mignogna	Measuring disability-associated appraisals for veterans with spinal cordinjury.	2015	PsychInfo
Heinemann	Measuring enfranchisement: importance of and control over participation by people with disabilities	2013	Pubmed
Heinemann	Measuring participation enfranchisement	2011	Pubmed
Bonniaud	Measuring quality of life in multiple sclerosis patients with urinary disorders using the Qualiveen questionnaire	2004	Pubmed
May	Measuring quality of life of persons with spinal cord injury: external and structural validity	2002	Pubmed
Van Drongelen	Mechanical load on the upper extremity during wheelchair activities	2005	Pubmed
Markenson	Mechanisms of chronic pain	1996	Pubmed
Huang	Mediating effects of social support and self-concept on depressive symptoms in adults with spinal cord injury	2015	Pubmed
Huang	Mediating effects of social support and self-concept on depressive symptoms in adults with spinal cord injury	2015	Pubmed
Willot	Medical monitoring and the daily life of paraplegic patients	1988	Pubmed
Fiorilli	Mental health and social participation skills of wheelchair basketball players: a controlled study	2013	Pubmed
Samy	Mental health forum 10. Making the most of his days.	1983	Pubmed
Bracken	Methylprednisolone or tirilazad mesylate administration after acute spinal cord injury: 1-year follow up. Results of the third National Acute Spinal Cord Injury randomized controlled trial	1998	Pubmed
Prodinger	Metric properties of the Spinal Cord Independence Measure - Self Report in a community survey	2016	Pubmed
Marino	Metric properties of the ASIA motor score: subscales improve correlation with functional activities	2004	Pubmed
Spaić	Microsurgical DREZotomy for pain of spinal cord and Cauda equina injury origin: clinical characteristics of pain and implications for surgery in a series of 26 patients	2002	Pubmed
Sasai	Microsurgical posterior herniotomy with en bloc laminoplasty: alternative method for treating cervical disc herniation	2005	Pubmed
Vaidyanathan	Midodrine: insidious development of urologic adverse effects in patients with spinal cord injury: a report of 2 cases	2007	Pubmed
van Hedel	Mismatch between investigator-determined and patient-reported independence after spinal cord injury: consequences for rehabilitation and trials.	2011	Pubmed
Atkins	Mobile arm supports: evidence-based benefits and criteria for use	2008	Pubmed
Biering-Sørensen	Mobility aids and transport possibilities 10-45 years after spinal cord injury	2004	Pubmed
Heinemann	Mobility for persons with spinal cord injury: an evaluation of two systems	1987	Pubmed
Molton	Modeling secondary health conditions in adults aging with physical disability	2014	Pubmed
Hattori	Modular megaprosthesis in metastatic bone disease of the femur	2011	Pubmed
Reichenfelser	Monitoring of spasticity and functional ability in individuals with incomplete spinal cord injury with a functional electrical stimulation cycling system	2012	Pubmed
Gulati	Morquio syndrome: a rehabilitation perspective	1996	Pubmed
Krause	Mortality after spinal cord injury: a four-year prospective study	1992	Cinahl
Krause	Mortality after spinal cord injury: an 11-year prospective study	1997	Pubmed
Thietje	Mortality in patients with traumatic spinal cord injury: descriptive analysis of 62 deceased subjects.	2011	Ebsco
Fliess-Douer	Most essential wheeled mobility skills for daily life: an international survey among Paralympic wheelchair athletes with spinal cord injury	2012	Pubmed
Westgren	Motherhood after traumatic spinal cord injury	1994	Pubmed
Alexander	Mothers with spinal cord injuries: impact on marital, family, and children's adjustment	2002	Pubmed
Brillhart	Motivation and the coping process of adults with disabilities: a qualitative study.	1997	Pubmed
Sasanuma	Motor and cognitive function analysis for home discharge using the Functional Independence Measure in patients undergoing cardiac rehabilitation at a long-term acute-care hospital	2015	Pubmed
Fattal	Motor capacities of upper limbs in tetraplegics: a new scale for the assessment of the results of functional surgery on upper limbs	2004	Pubmed
Hirschfeld	Motor control of every day motor tasks: guidance for neurological rehabilitation	2007	Pubmed
Dickstein	Motor imagery in physical therapist practice	2007	Pubmed
Wichers	Motor impairments and activity limitations in children with spastic cerebral palsy: a Dutch population-based study	2009	Pubmed
van Hedel	Motor recovery after spinal cord injury: assessments, factors and mechanisms	2010	Pubmed
Allen	Motor scores on the functional independence measure after pediatric spinal cord injury	2009	Pubmed
Müslümanoğlu	Motor, sensory and functional recovery in patients with spinal cord lesions.	1997	Pubmed
Zbogar	Movement repetitions in physical and occupational therapy during spinal cord injury rehabilitation	2017	Pubmed
Pollack	Moving Out Services for Education and Support (MOSES): a model program for individuals with spinal cord injury	1992	Pubmed
Hahn	Multidimensional health risk appraisal among adults aging with acquired disabilities	2013	Pubmed
Quan	Multidisciplinary treatment and survival of patients with vertebral metastases from thyroid carcinoma	2012	Pubmed
van der Sluis	Multiple injuries: an overview of the outcome	1995	Pubmed
Drolet	Muscle strength changes as measured by dynamometry following functional rehabilitation in individuals with spinal cord injury	1999	Pubmed
Sloan	Musculoskeletal effects of an electrical stimulation induced cycling programme in the spinal injured	1994	Pubmed
Hincapie	Musculoskeletal model-guided, customizable selection of shoulder and elbow muscles for a C5 SCI neuroprosthesis	2008	Pubmed
Joubert	My suprapubic catheter	2002	Pubmed
Florio	Need and use of assistive devices for personal mobility by individuals with spinal cord injury	2016	Pubmed
Dumville	Negative pressure wound therapy for treating pressure ulcers	2015	Cochrane
Elliott	Negotiating reality after physical loss: hope, depression, and disability	1991	Pubmed
Elliott	Negotiating reality after physical loss: Hope, depression, and disability.	1991	PsychInfo
McKinley	Neoplastic versus traumatic spinal cord injury: an outcome comparison after inpatient rehabilitation	1999	Pubmed
McKinley	Neoplastic vs. traumatic spinal cord injury: an inpatient rehabilitation comparison.	2000	Pubmed
Wu	Nerve repair using acidic fibroblast growth factor in human cervical spinal cord injury: a preliminary Phase I clinical study	2008	Pubmed
Fox	Nerve Transfers in Tetraplegia.	2016	Pubmed
Guay	Neuraxial blockade for the prevention of postoperative mortality and major morbidity: an overview of Cochrane systematic reviews	2014	Cochrane
Strobl	Neurogenic spinal deformities. II. Sitting and seating devices: principles and indications	2002	Pubmed
Beckung	Neuroimpairments, activity limitations, and participation restrictions in children with cerebral palsy	2002	Pubmed
Schenker	Neuroimpairments, activity performance, and participation in children with cerebral palsy mainstreamed in elementary schools	2005	Pubmed
Riaz	Neurologic compression by thoracic disc in a case of scheuermann kyphosis - an infrequent combination	2005	Pubmed
Manghi	Neurologic diseases, mental retardation and reduction in work capacity	1985	Pubmed
Munin	Neurologic recovery and functional improvement after vecuronium-induced quadriparesis	1995	Pubmed
Aito	Neurological and functional outcome in traumatic central cord syndrome	2007	Pubmed
Bracken	Neurological and functional status 1 year after acute spinal cord injury: estimates of functional recovery in National Acute Spinal Cord Injury Study II from results modeled in National Acute Spinal Cord Injury Study III	2002	Pubmed
Hundsberger	Neurological complications in cancer patients	2014	Pubmed
Fujimura	Neurological evaluation after radical resection of sacral neoplasms	1994	Pubmed
Middleton	Neurological level effect on the discharge functional status of spinal cord injured persons after rehabilitation	1998	Pubmed
Neva	Neurological outcome, working capacity and prognostic factors of patients with SCIWORA.	2012	Ebsco
Hillman	Neurological worsening due to infection from renal stones in a multiple sclerosis patient	2000	Pubmed
Doucet	Neuromuscular electrical stimulation for skeletal muscle function	2012	Pubmed
Hajibandeh	Neuromuscular electrical stimulation for the prevention of venous thromboembolism	2017	Cochrane
Allam	Neuromuscular scoliosis	2013	Pubmed
Popovic	Neuroprostheses for grasping	2002	Pubmed
Keith	Neuroprostheses for the upper extremity	2001	Pubmed
Rupp	Neuroprosthetics of the upper extremity—clinical application in spinal cord injury and future perspectives	2004	Pubmed
Xiong	Neuroprotection of erythropoietin and methylprednisolone against spinal cord ischemia-reperfusion injury	2011	Pubmed
Gear	New assistive technology for passive standing	1999	Pubmed
Lobo-Prat	New biomechanical model for clinical evaluation of the upper extremity motion in subjects with neurological disorders: an application case	2014	Pubmed
Stepanov	New conceptions in complex management of spine trauma patients including reconstructive microsurgery and succeeding rehabilitation	2008	Pubmed
Beekhuizen	New perspectives on improving upper extremity function after spinal cord injury	2005	Pubmed
Jorge	New rehabilitation models for neurologic inpatients in Brazil	2015	Pubmed
Raithatha	Non-invasive brain stimulation and robot-assisted gait training after incomplete spinal cord injury: A randomized pilot study	2016	Pubmed
Aidinoff	Non-linear formulas for the spinal cord injury ability realization measurement index	2012	Pubmed
Boldt	Non-pharmacological interventions for chronic pain in people with spinal cord injury	2014	Cochrane
Parry	Non-traumatic paraplegia [correction of paraplegis] in a Zimbabwean population--a retrospective survey	1999	Pubmed
McKinley	Nontraumatic vs. traumatic spinal cord injury: a rehabilitation outcome comparison	2001	Pubmed
Augoustides	Novel approaches to spinal cord protection during thoracoabdominal aortic interventions	2014	Pubmed
De los Reyes-Guzmán	Novel kinematic indices for quantifying movement agility and smoothness after cervical Spinal Cord Injury	2016	Pubmed
McCullumsmith	Novel risk factors associated with current suicidal ideation and lifetime suicide attempts in individuals with spinal cord injury	2015	Pubmed
Brogioli	Novel Sensor Technology To Assess Independence and Limb-Use Laterality in Cervical Spinal Cord Injury	2016	Pubmed
Schoening	Numerical scoring of self-care status: a study of the Kenny self-care evaluation	1968	Pubmed
Yagihashi	Nurse questionnaire survey about the urethral catheterization and clinical analysis of iatrogenic urethral injury	2014	Pubmed
Yagihashi	Nurse questionnaire survey about the urethral catheterization and clinical analysis of iatrogenic urethral injury	2014	Pubmed
Peters	Nursing care study - living with paraplegia: day by day	1982	Pubmed
Drake	Nursing Education Interventions for Managing Acute Pain in Hospital Settings: A Systematic Review of Clinical Outcomes and Teaching Methods	2017	EMBASE (elsevier)
Kristel	Nursing in quadriplegia. 1. Rehabilitation is a basic task of care	1998	Pubmed
Kida	Nursing of a patient with a central cervical cord injury	1983	Pubmed
Tanaka	Nursing of patients with cervical and other spinal cord injuries for independent urination actions: description of the nursing processes	1985	Pubmed
Yoshida	Nursing of patients with cervical cord injuries in a rehabilitation ward	1983	Pubmed
Yoon	Nursing study on rehabilitation of spinal cord injury client at home	1992	Pubmed
Stenson	Obesity and Inpatient Rehabilitation Outcomes for Patients With a Traumatic Spinal Cord Injury	2011	Cinahl
Vincent	Obesity and Weight Loss in the Treatment and Prevention of Osteoarthritis	2012	EMBASE (elsevier)
Wilson	Objective assessment of mobility of the spinal cord injured in a free-living environment	2008	Pubmed
Liang	Objective measures of neighborhood environment and self-reported physical activity in spinal cord injured men	2008	Pubmed
Okada	Observations in the diagnosis of cervical myelopathy in patients suffering from diabetes mellitus	2012	Pubmed
Gorzkowski	Obstacles to community participation among youth with spinal cord injury	2011	Pubmed
Mingaila	Occupational therapy for patients with spinal cord injury in early rehabilitation	2005	Pubmed
Mingaila	Occupational therapy in spinal cord injury	2004	Pubmed
Sargant	Occupational therapy management of the acute spinal cord-injured patient.	1986	Pubmed
Sosner	Odontoid fracture and C1-C2 subluxation in psoriatic cervical spondyloarthropathy. A case report	1996	Pubmed
Kadefors	On the feasibility of myo-electric control of multifunctional orthoses	1973	Pubmed
Scivoletto	One year follow up of spinal cord injury patients using a reciprocating gait orthosis: preliminary report	2000	Pubmed
House	One-stage key pinch and release with thumb carpal-metacarpal fusion in tetraplegia	1992	Pubmed
Kikuike	One-staged combined cervical and lumbar decompression for patients with tandem spinal stenosis on cervical and lumbar spine: analyses of clinical outcomes with minimum 3 years follow-up	2009	Pubmed
Chan	One-year follow-up of Chinese people with spinal cord injury: a preliminary study	2013	Pubmed
Mathiowetz	One-year follow-up to a randomized controlled trial of an energy conservation course for persons with multiple sclerosis.	2007	Cochrane
Shimada	Open heart surgery in a paraplegic patient	2004	Pubmed
McCunniff	Operative Versus Nonoperative Management of Civilian Gunshot Wounds to the Spinal Cord: Novel Use of the Functional Independence Measure for Validated Outcomes	2017	Pubmed
Zrubecky	Orthoses for restoration of prehensile function in tetraplegics	1972	Pubmed
DiPasquale-Lehnerz	Orthotic intervention for development of hand function with C-6 quadriplegia	1994	Pubmed
Wirz	Outcome after incomplete spinal cord injury: central cord versus Brown-Sequard syndrome.	2010	Pubmed
Ardolino	Outcome measurements in major trauma--results of a consensus meeting	2012	Pubmed
Ditunno	Outcome measures: evolution in clinical trials of neurological/functional recovery in spinal cord injury	2010	Pubmed
Davis	Outcome of functional electrical stimulation in the rehabilitation of a child with C-5 tetraplegia	1999	Pubmed
Spooren	Outcome of motor training programmes on arm and hand functioning in patients with cervical spinal cord injury according to different levels of the ICF: a systematic review	2009	Pubmed
Sampath	Outcome of patients treated for cervical myelopathy. A prospective, multicenter study with independent clinical review	2000	Pubmed
Mautner	Outcomes After Ultrasound-Guided Platelet-Rich Plasma Injections for Chronic Tendinopathy: A Multicenter, Retrospective Review	2013	EMBASE (elsevier)
Luksanapruksa	Outcomes and effectiveness of posterior occipitocervical fusion for suboccipital spinal metastases	2017	Pubmed
Consortium for Spinal Cord Medicine	Outcomes following traumatic spinal cord injury: clinical practice guidelines for health-care professionals.	2000	Pubmed
McKinley	Outcomes of early surgical management versus late or no surgical intervention after acute spinal cord injury	2004	Pubmed
Lucke	Outcomes of nurse caring as perceived by individuals with spinal cord injury during rehabilitation	1999	Pubmed
Hammond	Outcomes of social work and case management services during inpatient spinal cord injury rehabilitation: the SCIRehab project	2012	Pubmed
Matsuda	Outcomes of surgical treatment for cervical myelopathy in patients more than 75 years of age	1999	Pubmed
Mulcahey	Outcomes of tendon transfer surgery and occupational therapy in a child with tetraplegia secondary to spinal cord injury	1995	Pubmed
Davis	Outcomes of upper-extremity tendon transfers and functional electrical stimulation in an adolescent with C-5 tetraplegia.	1997	Pubmed
Shirado	Outdoor winter activities of spinal cord-injured patients. With special reference to outdoor mobility	1995	Pubmed
Lugo	Out-patient rehabilitation programme for spinal cord injured patients: evaluation of the results on motor FIM score	2007	Pubmed
Anderson	Overview of adult outcomes in pediatric-onset spinal cord injuries: implications for transition to adulthood	2004	Pubmed
Kratz	Pain Acceptance Decouples the Momentary Associations Between Pain, Pain Interference, and Physical Activity in the Daily Lives of People With Chronic Pain and Spinal Cord Injury	2017	Pubmed
Barrett	Pain characteristics in patients admitted to hospital with complications after spinal cord injury	2003	Pubmed
Donnelly	Pain following spinal cord injury: the impact on community reintegration	2005	Pubmed
Nepomuceno	Pain in patients with spinal cord injury	1979	Pubmed
Ullrich	Pain intensity, pain interference and characteristics of spinal cord injury.	2008	Pubmed
Hanley	Pain interference in persons with spinal cord injury: classification of mild, moderate, and severe pain	2006	Pubmed
Miró	Pain location and functioning in persons with spinal cord injury	2014	Pubmed
Marcondes	Pain severity and mobility one year after spinal cord injury: a multicenter, cross-sectional study	2016	Pubmed
Kunju	palmar pressure sensor for measurement of upper limb weight bearing by the hands during transfers by paraplegics	2013	Pubmed
Sakaura	Paraparesis due to exacerbation of preexisting spinal pseudoarthrosis following infliximab therapy for advanced ankylosing spondylitis	2006	Pubmed
Hancock	Paraplegia	1998	Pubmed
Huitt	Paraplegia ambulatory training using Craig-Scott orthoses	1978	Pubmed
Rodríguez Luna	Paraplegia due to adhesive arachnoiditis. A case report	2009	Pubmed
Lamid	Paraplegia due to adrenomyeloneuropathy	1984	Pubmed
Rosman	Paraplegic use of walking braces: a survey	1974	Pubmed
Mechanick	Parathyroid hormone suppression in spinal cord injury patients is associated with the degree of neurologic impairment and not the level of injury	1997	Pubmed
Sullivan	Part I: preventing injury and promoting rehabilitation. Specialized care of the spinal cord injured patient	1976	Pubmed
Noreau	Participation after spinal cord injury: the evolution of conceptualization and measurement	2005	Pubmed
Majnemer	Participation and enjoyment of leisure activities in school-aged children with cerebral palsy	2008	Pubmed
Ruoranen	Participation and integration from the perspective of persons with spinal cord injury from five European countries	2015	Pubmed
Kelly	Participation and quality of life among youth with spinal cord injury	2012	Pubmed
Magasi	Participation following traumatic spinal cord injury: an evidence-based review for research	2008	Pubmed
Lundström	Participation in activities and secondary health complications among persons aging with traumatic spinal cord injury	2017	Pubmed
Gray	Participation survey/mobility: psychometric properties of a measure of participation for people with mobility impairments and limitations	2006	Pubmed
Kreuter	Partner relationships, functioning, mood and global quality of life in persons with spinal cord injury and traumatic brain injury	1998	Pubmed
Kreuter	Partner relationships, functioning, mood and global quality of life in persons with spinal cord injury and traumatic braininjury .	1998	Cochrane
Prabhu	Passive movements for the treatment and prevention of contractures	2013	Cochrane
Norris-Baker	Patient behavior as a predictor of outcomes in spinal cord injury	1981	Pubmed
Nelson	Patient evaluation of prone carts used in spinal cord injury	1996	Pubmed
Gunnarsson	Patient experiences with intrathecal baclofen as a treatment for spasticity - a pilot study	2015	Pubmed
Iwakura	Patient monitoring in the hospital rehabilitation department	1984	Pubmed
Carter	Patient planning in a spinal cord centre using a computer	1972	Pubmed
Byrnes	Patient-focused goal planning process and outcome after spinal cord injury rehabilitation: quantitative and qualitative audit	2012	Pubmed
Adelved	Patient-reported health minimum 8 years after operatively treated displaced sacral fractures: a prospective cohort study	2014	Pubmed
Eva	Patients' constructions of disability in metastatic spinal cord compression	2009	Pubmed
Arshad	Patients with chronic dizziness following traumatic head injury typically have multiple diagnoses involving combined peripheral and central vestibular dysfunction	2017	EMBASE (elsevier)
Zaoui	Patients with complicated Pott's disease: management in a rehabilitation department and functional prognosis	2012	Pubmed
Bartz	Patients with severe disabilities: assistence is the key to independent living	2003	Pubmed
Taylor	Pattern of use and user satisfaction of Neuro Control Freehand system	2001	Pubmed
Taylor	Patterns in Wheeled Mobility Skills Training, Equipment Evaluation, and Utilization: Findings from the SCIRehab Project. Assist Technol	2015	Pubmed
Norweg	Patterns, predictors, and associated benefits of driving a modified vehicle after spinal cord injury: findings from the National Spinal Cord Injury Model Systems	2011	Pubmed
Ameringer	Pediatric Pain Management Knowledge Test	2012	PsychInfo
Murphy	Pediatric rehabilitation: 2. Environmental factors affecting participation	2010	Pubmed
Kim	Pediatric rehabilitation: 5. Transitioning teens with disabilities into adulthood.	2010	Pubmed
Paleg	Pediatric seating and support	2006	Pubmed
Cheng	Pedicle screw fixation for traumatic fractures of the thoracic and lumbar spine	2013	Cochrane
Crawford	People with mobility impairments: Physical activity and quality of participation	2008	Pubmed
Borges	People with spinal cord injury and the different perceptions about their condition	2012	Pubmed
Price	Perceived causes of change in function and quality of life for people with long duration spinal cord injury	2004	Pubmed
Reinhardt	Perceived impact of environmental barriers on participation among people living with spinal cord injury in Switzerland	2016	Pubmed
Gontkovsky	Perceived information needs of community-dwelling persons with chronic spinal cord injury: findings of a survey and impact of race	2007	Pubmed
Bertschy	Perceived needs and experiences with healthcare services of women with spinal cord injury during pregnancy and childbirth - a qualitative content analysis of focus groups and individual interviews.	2015	Ebsco
Bryden	Perceived outcomes and utilization of upper extremity surgical reconstruction in individuals with tetraplegia at model spinal cord injury systems.	2004	Pubmed
Van de Velde	Perceived participation, experiences from persons with spinal cord injury in their transition period from hospital to home	2010	Cinahl
Fleuren	Perception of lower limb spasticity in patients with spinal cord injury	2009	Pubmed
Bell	Perception of the impact of assistive devices on daily life of three individuals with quadriplegia.	1995	Pubmed
Larsson Lund	Perceptions of participation and predictors of perceived problems with participation in persons with spinal cord injury	2005	Pubmed
de FranÃ§a	Perceptions of adults with spinal cord injury on the skills for daily activities and health indicators in the light of noc: descriptive research	2011	Cinahl
Cesar	Perceptions of environmental safety among individuals with spinal cord injury	2002	Pubmed
Lannem	Perceptions of exercise mastery in persons with complete and incomplete spinal cord injury	2010	Pubmed
Buchbinder	Percutaneous vertebroplasty for osteoporotic vertebral compression fracture	2015	Cochrane
Kushchayev	Percutaneous vertebroplasty for thyroid cancer metastases to the spine	2010	Pubmed
Andresen	Performance of health-related quality-of-life instruments in a spinal cord injured population	1999	Pubmed
Wangdell	Performance of prioritized activities is not correlated with functional factors after grip reconstruction in tetraplegia	2011	Pubmed
Rowell	Personal assistance, income and employment: the spinal injuries survey instrument (SISI) and its application in a sample of people with quadriplegia.	2008	Pubmed
Rowell	Personal assistance, income and employment: the spinal injuries survey instrument (SISI) and its application in a sample of people with quadriplegia.	2008	Pubmed
Nosek	Personal assistance: its effect on the long-term health of a rehabilitation hospital population	1993	Pubmed
Alon	Persons with C5 or C6 tetraplegia achieve selected functional gains using a neuroprosthesis.	2003	Pubmed
Taricco	Pharmacological interventions for spasticity following spinal cord injury	2000	Pubmed
Taricco	Pharmacological interventions for spasticity following spinal cord injury: results of a Cochrane systematic review	2006	Pubmed
Taricco	Pharmacological interventions for spasticity following spinal cord injury	2000	Cochrane
Awad	Phenol block for control of hip flexor and adductor spasticity	1972	Pubmed
Burns	Phenomenological study of neurogenic bowel from the perspective of individuals living with spinal cord injury	2015	Pubmed
Burns	Phenomenological study of neurogenic bowel from the perspective of individualsliving with spinal cord injury	2015	Pubmed
Geneen	Physical activity and exercise for chronic pain in adults: an overview of Cochrane Reviews	2017	Cochrane
Martin Ginis	Physical activity and subjective well-being among people with spinal cord injury: a meta-analysis	2010	Pubmed
Tawashy	Physical activity is related to lower levels of pain, fatigue and depression in individuals with spinal-cord injury: a correlational study	2009	Pubmed
Buchholz	Physical activity levels are low in free-living adults with chronic paraplegia	2003	Pubmed
Morris	Physical activity recommendations for children and adolescents with chronic disease	2008	Pubmed
Kawanishi	Physical activity, quality of life, and functional autonomy of adults with spinal cord injuries	2013	Pubmed
Nakajima	Physical and social condition of rehabilitated spinal cord injury patients in Japan: a long-term review	1988	Pubmed
Dallmeijer	Physical capacity and physical strain in persons with tetraplegia; the role of sport activity	1996	Pubmed
Murphy	Physical disability and social liminality: a study in the rituals of adversity.	1988	Pubmed
Dudgeon	Physical disability and the experience of chronic pain	2002	Pubmed
Hjeltnes	Physical endurance capacity, functional status and medical complications in spinal cord injured subjects with long-standing lesions	1990	Pubmed
Davis	Physical fitness training for people with spinal cord injury	2017	Cochrane
Marin	Physical medicine and rehabilitation in the military: the Bosnian mass casualty experience	2001	Pubmed
Dallmeijer	Physical performance during rehabilitation in persons with spinal cord injuries	1999	Pubmed
Dallmeijer	Physical performance in persons with spinal cord injuries after discharge from rehabilitation.	1999	Pubmed
Dallmeijer	Physical performance in persons with spinal cord injuries after discharge from rehabilitation	1999	Cinahl
Yoshihara	Physical rehabilitation and nursing of patients with cervical cord injuries and severe paralysis of the shoulder and arms	1983	Pubmed
Trigiano	Physical rehabilitation of quadriplegic patients	1970	Pubmed
Janssen	Physical strain in daily life of wheelchair users with spinal cord injuries.	1994	Pubmed
Chu	Physical therapists' ability to predict future mobility after spinal cord injury.	2012	Pubmed
Gutiérrez	Physical therapy interventions for the prevention of fractures after spinal cord injury	2017	Cochrane
Gilgoff	Planning an outing from hospital for ventilator-dependent children	1992	Pubmed
Wu	Plasma Tumor Necrosis Factor-alpha (TNF-α) Levels Correlate with Disease Severity in Spastic Diplegia, Triplegia, and Quadriplegia in Children with Cerebral Palsy	2015	Pubmed
Silber	Pneumatic orthosis PILOT STUDY	1975	Pubmed
Miller	Pneumobelt use among high quadriplegic population	1988	Pubmed
Schellinger	Poliomyelitic-like illness in central European encephalitis	2000	Pubmed
Schmidt	Polyneuropathy as a sole syndrome in malignant thymoma	2003	Pubmed
Rogers	Portrait of an active tetraplegic	1983	Pubmed
Yoshimura	Possibility of independence in ADL (Activities of Daily Living) for patients with cervical spinal cord injuries--an evaluation based on the Zancolli Classification of Residual Arm Functions	1998	Pubmed
Cizmar	Possible restorations of the upper extremity motion in tetraplegic patients - 5-year clinical experience	2006	Pubmed
Sapountzi-Krepia	Post traumatic paraplegics living in Athens: the impact of pressure sores and UTIs on everyday life activities.	1998	Pubmed
Bloemen-Vrencken	Post-discharge nursing problems of spinal cord injured patients: on which fields can nurses contribute to rehabilitation?	2003	Pubmed
Bonds	Posterior deltoid-to-triceps tendon transfer to restore active elbow extension in patients with tetraplegia	2009	Pubmed
Nielsen	Post-traumatic syringomyelia	2003	Pubmed
Goldstein	Posttraumatic syringomyelia: profound neuronal loss, yet preserved function.	1998	Pubmed
Anton	Posttraumatic syringomyelia: the British Columbia experience	1986	Pubmed
Middleton	Postural control during stance in paraplegia: effects of medially linked versus unlinked knee-ankle-foot orthoses	1999	Pubmed
Schüssler-Fiorenza Rose	Potentially Avoidable Hospitalizations among People at Different Activity of Daily Living Limitation Stages	2017	Pubmed
Bottos	Powered wheelchairs and independence in young children with tetraplegia	2001	Pubmed
Atanasov	Practical guidelines for the management of closed spinal cord injuries	1997	Pubmed
Nunn	Practical issues affecting the measurement and analysis of physiological data recorded remotely from individuals with spinal cord injury (SCI) during normal daily activities	2006	Pubmed
Aass	Pre- and post-treatment daily life function in patients with hormone resistant prostate carcinoma treated with radiotherapy for spinal cord compression	2005	Pubmed
Whiteneck	Predicting community reintegration after spinal cord injury from demographic and injury characteristics	1999	Pubmed
Whiteneck	Predicting community reintegration after spinal cord injury from demographic and injury characteristics.	1999	Pubmed
Tate	Predicting depression and psychological distress in persons with spinal cord injury based on indicators of handicap	1994	Pubmed
Murphy	Predicting employment status at 2 years' postdischarge from spinal cord injury rehabilitation	2011	Pubmed
Murphy	Predicting employment status at 2 years' postdischarge from spinal cordinjury rehabilitation.	2011	PsychInfo
Tonack	Predicting life satisfaction after spinal cord injury in a Canadian sample	2008	Pubmed
MacKenzie	Predicting posttrauma functional disability for individuals without severe brain injury	1986	Pubmed
Erosa	Predicting quality of life 5 years after medical discharge for traumatic spinal cord injury	2014	Pubmed
DeVivo	Predicting unplanned hospitalizations in persons with spinal cord injury	1994	Pubmed
Ivie	Predicting unplanned hospitalizations in persons with spinal cord injury.	1994	Pubmed
Velstra	Prediction and stratification of upper limb function and self-care in acute cervical spinal cord injury with the graded redefined assessment of strength, sensibility, and prehension (GRASSP)	2014	Pubmed
Murphy	Prediction of employment status one year post-discharge from rehabilitation following traumatic spinal cord injury: an exploratory analysis of participation and environmental variables	2009	Pubmed
Schönherr	Prediction of functional outcome after spinal cord injury: a task for the rehabilitation team and the patient.	2000	Pubmed
Lazar	Prediction of functional outcome by motor capability after spinal cord injury	1989	Pubmed
Liu	Prediction of severe neurogenic bowel dysfunction in persons with spinal cord injury.	2010	Ebsco
Velstra	Predictive Value of Upper Limb Muscles and Grasp Patterns on Functional Outcome in Cervical Spinal Cord Injury	2016	Pubmed
Abdul-Sattar	Predictors of functional outcome in patients with traumatic spinal cord injury after inpatient rehabilitation: in Saudi Arabia.	2014	Pubmed
Meyers	Predictors of medical care utilization by independently living adults with spinal cord injuries	1989	Pubmed
Meyers	Predictors of medical care utilization by independently living adults with spinal cord injuries.	1989	Pubmed
Aarabi	Predictors of outcome in acute traumatic central cord syndrome due to spinal stenosis	2011	Pubmed
Weitzenkamp	Predictors of personal care assistance for people with spinal cord injury	2002	Pubmed
Epstein	Predictors of rehabilitation outcome among patients with SCI	1989	Pubmed
Letts	Preferred methods and messengers for delivering physical activity information to people with spinal cord injury: A focus group study.	2011	PsychInfo
Creighton	Pregnancy and quadriplegia: an occupational therapy home program	1989	Pubmed
Fisher	Preliminary evaluation of a neural prosthesis for standing after spinal cord injury with four contact nerve-cuff electrodes for quadriceps stimulation	2006	Pubmed
Kalpakjian	Preliminary reliability and validity of a Spinal Cord Injury Secondary Conditions Scale	2007	Pubmed
Nyland	Preserving transfer independence among individuals with spinal cord injury	2000	Pubmed
Finnegan	Pressure sores. 1. Positive living or negative existence?	1983	Pubmed
Garber	Pressure ulcer risk in spinal cord injury: predictors of ulcer status over 3 years	2000	Pubmed
Fuhrer	Pressure ulcers in community-resident persons with spinal cord injury: prevalence and risk factors	1993	Pubmed
Holtz	Prevalence and Effect of Problematic Spasticity After Traumatic Spinal Cord Injury.	2017	Pubmed
Subbarao	Prevalence and impact of wrist and shoulder pain in patients with spinal cord injury.	1995	Pubmed
Prysak	Prevalence of secondary conditions in veterans with spinal cord injury and their interference with life activities.	2000	Cinahl
Pellegrini	Prevalence of shoulder discomfort in paraplegic subjects	2012	Pubmed
Breitung	Preventive psychology - theory and practical application on the example of paraplegic patients (author's transl)	1982	Pubmed
Lee	Primary intradural extramedullary melanoma of the cervical spinal cord: case report	2010	Pubmed
Döderlein	Principles of orthopedic treatment of flaccid paralysis	2014	Pubmed
Toh	Probiotics for preventing urinary tract infection in people with neuropathic bladder	2017	Cochrane
Piatt	Problematic secondary health conditions among adults with spinal cord injury and its impact on social participation and daily life	2016	Pubmed
Hicks	Problems in writing injury assessment reports. Part III: Spinal injury and paraplegia: the third of a series.	1988	Pubmed
Hooker	Problems of veterans spinal cord injured after age 55: nursing implications	1986	Pubmed
Curt	Prognosis of traumatic spinal cord lesions. Significance of clinical and electrophysiological findings	1997	Pubmed
Rades	Prognostic factors and a survival score for patients with metastatic spinal cord compression from colorectal cancer	2012	Pubmed
Rades	Prognostic factors in a series of 504 breast cancer patients with metastatic spinal cord compression	2012	Pubmed
Tang	Prognostic indicators in metastatic spinal cord compression: using functional independence measure and Tokuhashi scale to optimize rehabilitation planning	2007	Pubmed
Thometz	Progression of scoliosis after skeletal maturity in institutionalized adults who have cerebral palsy	1988	Pubmed
Merenda	Progressive treatment options for children with spinal cord injury	2000	Pubmed
Lancioni	Promoting ambulation and object manipulation in persons with multiple handicaps through the use of a robot	1994	Pubmed
Bodzioch	Promoting independence in adolescent paraplegics: a 2-week "camping" experience	1986	Pubmed
Coulet	Pronating osteotomy of the radius for forearm supination contracture in high-level tetraplegic patients: technique and results		Pubmed
Mulcahey	Prospective evaluation of biceps to triceps and deltoid to triceps for elbow extension in tetraplegia	2003	Pubmed
Kishi	Prospective longitudinal study of depression following spinal cord injury	1994	Pubmed
Dudgeon	Prospective measurement of functional changes after selective dorsal rhizotomy	1994	Pubmed
Duffill	Prospective study of omental transposition in patients with chronic spinal injury	2001	Pubmed
Herman	Prosthetic fitting and ambulation in a paraplegic patient with an above-knee amputation	1995	Pubmed
Ackerly	Proximal femoral resection for subluxation or dislocation of the hip in spastic quadriplegia	2003	Pubmed
Andresen	Proxy reliability: health-related quality of life (HRQoL) measures for people with disability	2001	Pubmed
Judd	Psychiatric consultation in a spinal injuries unit	1992	Pubmed
Howard	Psychological aftereffects of halo traction	1982	Pubmed
Kennedy	Psychological contributions to functional independence: a longitudinal investigation of spinal cord injury rehabilitation	2011	Pubmed
Shaw	Psychological coping with intermittent self-catheterisation (ISC) in people with spinal injury: A qualitative study	2013	Cinahl
Gajraj-Singh	Psychological impact and the burden of caregiving for persons with spinal cord injury (SCI) living in the community in Fiji	2011	Pubmed
Kennedy	Psychological impact of the management of methicillin-resistant Staphylococcus aureus (MRSA) in patients with spinal cord injury	1997	Pubmed
Eccleston	Psychological therapies for the management of chronic neuropathic pain in adults	2015	Cochrane
deRoon-Cassini	Psychological well-being after spinal cord injury: perception of loss and meaning making	2009	Pubmed
deRoon-Cassini	Psychological well-being after spinal cord injury: Perception of loss and meaning making.	2009	PsychInfo
Soler	Psychometric evaluation of the Spanish version of the MPI-SCI	2013	Pubmed
Morales	Psychometric properties of the Child Health Assessment Questionnaire (CHAQ) applied to children and adolescents with cerebral palsy	2008	Pubmed
Hirsh	Psychometric properties of the community integration questionnaire in a heterogeneous sample of adults with physical disability	2011	Pubmed
Ballert	Psychometric properties of the Nottwil Environmental Factors Inventory Short Form	2015	Pubmed
Chase	Psychosocial adjustment of persons with spinal cord injury	1990	Pubmed
Richards	Psycho-social aspects of chronic pain in spinal cord injury	1980	Pubmed
Tran	Psychosocial aspects of spinal cord injury pain: a meta-analysis	2016	Pubmed
Jensen	Psychosocial factors and adjustment to chronic pain in persons with physical disabilities: a systematic review	2011	Pubmed
Anderson	Psychosocial factors associated with pressure sores	1979	Pubmed
Morgan	Psychosocial rehabilitation in VA Spinal Cord Injury Centers.	1974	PsychInfo
Widerström-Noga	Psychosocial subgroups in persons with spinal cord injuries and chronic pain	2007	Pubmed
Appleton	'Pure' and 'complicated' forms of hereditary spastic paraplegia presenting in childhood	1991	Pubmed
McMeekin	Quadriplegia: focus on rehabilitation	1993	Pubmed
Delargy	Quadriplegic care: an assessment of the impact of the carer	1988	Pubmed
Jackson	Qualitative study of principles pertaining to lifestyle and pressure ulcer risk in adults with spinal cord injury	2010	Pubmed
Myaskovsky	Quality and Equity in Wheelchairs Used by Veterans	2017	EMBASE (elsevier)
Post	Quality of life after spinal cord injury	2005	Pubmed
Putzke	Quality of life after spinal cord injury caused by gunshot	2001	Pubmed
Hammell	Quality of life among people with high spinal cord injury living in the community	2004	Pubmed
Winthrop	Quality of life and functional outcome after pediatric trauma	2005	Pubmed
Westgren	Quality of life and traumatic spinal cord injury	1998	Pubmed
King	Quality of life assessment with the medical outcomes study short form-36 among patients with cervical spondylotic myelopathy	2003	Pubmed
Gerhart	Quality of life following spinal cord injury: knowledge and attitudes of emergency care providers	1994	Pubmed
Matsunaga	Quality of life in elderly patients with ossification of the posterior longitudinal ligament	2001	Pubmed
Pannek	Quality of life in German-speaking patients with spinal cord injuries and bladder dysfunctions. Validation of the German version of the Qualiveen questionnaire	2007	Pubmed
Gurcay	Quality of life in patients with spinal cord injury	2010	Pubmed
Bach	Quality of life in quadriplegic adults: a focus group study	1993	Pubmed
Rognoni	Quality of life of patients with spinal cord injury in Italy: preliminary evaluation	2014	Pubmed
Hu	Quality of life of traumatic spinal cord injured patients in Hong Kong.	2008	Pubmed
Norrbrink Budh	Quality of sleep in individuals with spinal cord injury: a comparison between patients with and without pain	2005	Pubmed
Yerxa	Quality of time use by adults with spinal cord injuries	1990	Pubmed
Cooper	Quality-of-life technology for people with spinal cord injuries	2010	Pubmed
Whiteneck	Quantifying environmental factors: a measure of physical, attitudinal, service, productivity, and policy barriers	2004	Pubmed
Whiteneck	Quantifying environmental factors: a measure of physical, attitudinal, service, productivity, and policy barriers.	2004	Pubmed
Whiteneck	Quantifying handicap: a new measure of long-term rehabilitation outcomes	1992	Pubmed
Harvey	Quantifying the magnitude of torque physiotherapists apply when stretching the hamstring muscles of people with spinal cord injury	2003	Pubmed
Harvey	Quantifying the magnitude of torque physiotherapists apply when stretching the hamstring muscles of people with spinal cord injury.	2003	Pubmed
Smith	Quantitative comparison of grasp and release abilities with and without functional neuromuscular stimulation in adolescents with tetraplegia	1996	Pubmed
Shirado	Quantitative evaluation of long sitting in paraplegic patients with spinal cord injury.	2004	Pubmed
Putzke	Race: predictor versus proxy variable? Outcomes after spinal cord injury	2002	Pubmed
Fyffe	Racial and ethnic disparities in functioning at discharge and follow-up among patients with motor complete spinal cord injury	2014	Pubmed
Walker	Racial-ethnic variations in paid and unpaid caregiving: Findings among persons with traumatic spinal cord injury	2015	Pubmed
Kida	Radiation therapy for metastatic spinal tumors	2000	Pubmed
Chen	Raffinee in the treatment of spinal cord injury: an open-labeled clinical trial	2005	Pubmed
Houlihan	Randomized Trial of a Peer-Led, Telephone-Based Empowerment Intervention for Persons With Chronic Spinal Cord Injury Improves Health Self-Management	2017	Cinahl
Nakajima	Rapidly progressive neuropathic arthropathy of the knee in possible association with a huge extruded cervical intervertebral disc herniation	2010	Pubmed
Itzkovich	Rasch analysis of the Catz-Itzkovich spinal cord independence measure	2002	Pubmed
Dumont	Rasch modeling and the measurement of social participation.	2003	Pubmed
Hills	Read my lips	2000	Pubmed
Moore	Real-world applications for brain-computer interface technology	2003	Pubmed
Creighton	Reasoning and the art of therapy for spinal cord injury	1995	Pubmed
Stanback	Rebuilding lives after injury	2014	Pubmed
Giuffrida	Reciprocal EMG control of elbow extension by FES	2001	Pubmed
Mayer	Reciprocal strength ratio in shoulder abduction/adduction in sports and daily living	2001	Pubmed
Vanden Berghe	Reconstruction of the upper extremity in tetraplegia: functional assessment, surgical procedures and rehabilitation	1991	Pubmed
Ainsley	Reconstructive hand surgery for quadriplegic persons	1985	Pubmed
Lim	Recovery and regeneration after spinal cord injury: a review and summary of recent literature	2007	Pubmed
Curt	Recovery from a spinal cord injury: significance of compensation, neural plasticity, and repair	2008	Pubmed
Rao	Recovery in non-vascular locked-in syndrome during treatment with Sinemet	1989	Pubmed
Ditunno	Recovery patterns are observable, predictable and reflect therapist-measured assessments of how well a person is able to perform specific tasks	2009	Pubmed
Middleton	Reexamining the Validity and Dimensionality of the Moorong Self-Efficacy Scale: Improving Its Clinical Utility.	2016	Pubmed
Estwick	Rehabilitating the patient with central cervical cord compression	1973	Pubmed
De Vivo	Rehabilitation adds life to years	1991	Pubmed
Koch-Borner	Rehabilitation After Posterior Deltoid to Triceps Transfer in Tetraplegia.	2016	Pubmed
Johanson	Rehabilitation After Surgical Reconstruction to Restore Function to the Upper Limb in Tetraplegia: A Changing Landscape	2016	Pubmed
House	Rehabilitation and future participation of youth following spinal cord injury: caregiver perspectives	2009	Pubmed
Kurihara	Rehabilitation approach to children with sequelae of hypoxic encephalopathy	1998	Pubmed
Nam	Rehabilitation challenges in craniospinal injury: two case reports	1996	Pubmed
Dollfus	Rehabilitation following injury to the spinal cord.	1993	Pubmed
Sato	Rehabilitation for paraplegia caused by neuromyelitis optica: a case report.	2014	Pubmed
Saur	Rehabilitation for paraplegics	2015	Pubmed
Haas	Rehabilitation goals of people with spinal cord injuries can be classified against the International Classification of Functioning, Disability and Health Core Set for spinal cord injuries	2016	Pubmed
Lewis	Rehabilitation in a rural setting of a young quadriplegic accident victim. Integrative clinicopathological conference: medical, psychosocial, economic, preventive, and ethical dimensions of a case study	1985	Pubmed
Formica	Rehabilitation in neuro-oncology: a meta-analysis of published data and a mono-institutional experience	2011	Pubmed
Keppler	Rehabilitation in spinal cord injury	1987	Pubmed
Rauch	Rehabilitation needs assessment in persons with spinal cord injury following the 2010 earthquake in Haiti: a pilot study using an ICF-based tool	2011	Pubmed
Ford	Rehabilitation of a quadriplegic	1971	Pubmed
Miake	Rehabilitation of adult spinal cord injuries	1986	Pubmed
Mathé	Rehabilitation of paraplegic patients	1988	Pubmed
Apte-Kakade	Rehabilitation of patients with quadriparesis after treatment of status asthmaticus with neuromuscular blocking agents and high-dose corticosteroids	1991	Pubmed
James	Rehabilitation of patients with traumatic cord lesions	1981	Pubmed
Kirshblum	Rehabilitation of persons with central nervous system tumors	2001	Pubmed
Tuel	Rehabilitation of quadriparesis secondary to spinal cord sarcoidosis.	1991	Pubmed
Suyama	Rehabilitation of spinal cord injury in the national rehabilitation center for the disabled of Japan: profile of a spinal service	1997	Pubmed
King	Rehabilitation of the patient with a spinal cord injury	1980	Pubmed
Panchal	Rehabilitation of the patient with spinal cord injury	1980	Pubmed
Woolsey	Rehabilitation outcome following spinal cord injury	1985	Pubmed
[truncated: 634 more rows]

## Sheet: Titles reviewed
Author	Title	Year of publication	Database	Relevant/Irrelevant	Abstracts Searched/Not found	Abstracts Reviewed/Excluded	Cause of exclusion
[truncated: 2,062 more rows]

[truncated: 4 more sheets: Abstracts searched, Abstracts reviewed, Full texts reviewed, Articles included]
